# Supplementary material for: Transcriptome-Guided Insights Into Plastic Degradation by the Marine Bacterium
Source: Front Microbiol. 2021 Sep 27;12:751571. doi: 10.3389/fmicb.2021.751571 (PMC8503683; doi:10.3389/fmicb.2021.751571)
Supplement: Supplementary Table 2 — Description of high-quality read. ∗ C1_R1, C1_R2; C2_R1, C2_R2; C3_R1, C3_R2—paired reads of control samples in triplicates. ∗ T1 R1, T1 R2; T2 R1, T2 R2, T3 R1, T3 R2—paired reads of PET treated samples in triplicates. [file Table_2.XLSX]

## Sheet: Sheet1
Characteristics	C1_R1	C1_R2	avg c1	C2_R1	C2_R2	avg c2	C3_R1	C3_R2
Total number of reads	7768971	7768971	7768971	5728500	5728500	5728500	7566453	7566453
Total number of HQ reads	7753244	6268281	7.01076e+06	5715799	4586937	5151368	7551683	6088490
Percentage of HQ reads	0.998	0.8068	0.9024	0.9978	0.8007	0.89925	0.998	0.8047
Total number of bases	784666071	784666071	784666071	578578500	578578500	578578500	764211753	764211753
Total number of bases in HQ reads	783077644	633096381	7.08087e+08	577295699	463280637	520288168	762719983	614937490
Total number of HQ bases in HQ reads	773603125	613126050	6.93365e+08	570142437	448333328	5.09238e+08	753702604	595671217
Percentage of HQ bases in HQ reads	0.9879	0.9685	0.9782	0.9876	0.9677	0.97765	0.9882	0.9687
Total number of HQ filtered reads	7750791	6268270	7.00953e+06	5713868	4586928	5150398	7548716	6088480
Percentage of HQ filtered reads	0.9977	0.8068	0.90225	0.9974	0.8007	0.89905	0.9977	0.8047
Characteristics	C 1	C2	C3	Avg	T1	T2	T3	Avg
Total number of reads	7768971	5728500	7566453	7021308	4776099	7359068	6246049	6127072
Total number of HQ reads	7.01076e+06	5151368	6.82009e+06	6.32741e+06	4699311	6681586	5.63134e+06	5.67074e+06
Percentage of HQ reads	0.9024	0.89925	0.90135	0.901	0.9839	0.90795	0.9016	0.93115
Total number of bases	784666071	578578500	764211753	709152108	477609900	743265868	630850949	617242239
Total number of bases in HQ reads	7.08087e+08	520288168	6.88829e+08	6.39068e+08	469931100	674840186	5.68765e+08	5.71179e+08
Total number of HQ bases in HQ reads	6.93365e+08	5.09238e+08	6.74687e+08	6.25763e+08	4.63786e+08	6.61268e+08	5.56917e+08	5.60657e+08
Percentage of HQ bases in HQ reads	0.9782	0.97765	0.97845	0.9781	0.98685	0.979	0.9781	0.981317
Total number of HQ filtered reads	7.00953e+06	5150398	6818598	6.32618e+06	4698897	6680926	5629979	5669934
Percentage of HQ filtered reads	90.23	89.91	90.1	90.08	98.38	90.78	90.13	93.0967
Characteristics	Control	Treatment
Total number of reads	7021308	6127072
Total number of HQ reads	6.32741e+06	5.67074e+06
Percentage of HQ reads	0.901	0.93115
Total number of bases	709152108	617242239
Total number of bases in HQ reads	6.39068e+08	5.71179e+08
Total number of HQ bases in HQ reads	6.25763e+08	5.60657e+08
Percentage of HQ bases in HQ reads	0.9781	0.981317
Total number of HQ filtered reads	6.32618e+06	5669934
Percentage of HQ filtered reads	90.08	93.0967
