# Supplementary material for: Transcriptome-Guided Insights Into Plastic Degradation by the Marine Bacterium
Source: Front Microbiol. 2021 Sep 27;12:751571. doi: 10.3389/fmicb.2021.751571 (PMC8503683; doi:10.3389/fmicb.2021.751571)
Supplement: Supplementary Table 3 — A detailed description of filtered reads for mRNA-seq. [file Table_3.XLSX]

## Sheet: annotations
test_id	gene_id	locus	sample_1	sample_2	status	value_1	value_2	log2(fold_change)	test_stat	Annotations
XLOC_000272	XLOC_000272	Scaffold_1:410445-411736	C	T	OK	1081.02	1065.28	-0.0211618	-0.0872839	putative membrane protein
XLOC_000593	XLOC_000593	Scaffold_1:878859-879249	C	T	OK	149.593	143.87	-0.0562764	-0.171606	4-oxalocrotonate tautomerase
XLOC_003778	XLOC_003778	Scaffold_1:4000459-4006452	C	T	OK	872.04	721.96	-0.272475	-0.954072	P-hydroxybenzoate hydroxylase (EC 1.14.13.2);Ontology_term
XLOC_000001	XLOC_000001	Scaffold_1:3071-4538	C	T	OK	370.309	347.58	-0.0913847	-0.422763	Inosine-5'-monophosphate dehydrogenase (EC 1.1.1.205) / CBS domain;Ontology_term
XLOC_000002	XLOC_000002	Scaffold_1:4692-6018	C	T	OK	190.719	198.007	0.0541087	0.222371	D-alanyl-D-alanine carboxypeptidase (EC 3.4.16.4);Ontology_term
XLOC_000003	XLOC_000003	Scaffold_1:6204-7089	C	T	OK	232.132	236.296	0.0256466	0.102111	Pyridoxine biosynthesis glutamine amidotransferase%2C synthase subunit (EC 2.4.2.-);Ontology_term
XLOC_000004	XLOC_000004	Scaffold_1:7110-7701	C	T	OK	530.882	483.605	-0.134562	-0.56992	Pyridoxine biosynthesis glutamine amidotransferase%2C glutaminase subunit (EC 2.4.2.-);Ontology_term
XLOC_000005	XLOC_000005	Scaffold_1:8029-9307	C	T	OK	355.8	354.696	-0.00448312	-0.0205793	Seryl-tRNA synthetase (EC 6.1.1.11);Ontology_term
XLOC_000006	XLOC_000006	Scaffold_1:16475-17589	C	T	OK	415.296	440.754	0.0858344	0.309573	tRNA-specific adenosine-34 deaminase (EC 3.5.4.-);Ontology_term
XLOC_000007	XLOC_000007	Scaffold_1:18074-19775	C	T	OK	436.052	419.277	-0.0565964	-0.267884	DNA polymerase III subunits gamma and tau (EC 2.7.7.7);Ontology_term
XLOC_000008	XLOC_000008	Scaffold_1:19822-20125	C	T	OK	331.427	306.384	-0.113349	-0.371569	FIG000557: hypothetical protein co-occurring with RecR
XLOC_000009	XLOC_000009	Scaffold_1:20138-20735	C	T	OK	84.296	74.0024	-0.187892	-0.60477	Recombination protein RecR
XLOC_000010	XLOC_000010	Scaffold_1:20755-20980	C	T	OK	124.029	73.1585	-0.761581	-1.21815	FIG015094: hypothetical protein
XLOC_000011	XLOC_000011	Scaffold_1:21044-21311	C	T	OK	386.686	365.629	-0.0807799	-0.247609	Inhibitor of pro-sigmaK processing BofA
XLOC_000012	XLOC_000012	Scaffold_1:22228-22846	C	T	OK	300.537	305.549	0.0238629	0.0905366	5-bromo-4-chloroindolyl phosphate hydrolysis protein
XLOC_000013	XLOC_000013	Scaffold_1:22862-24056	C	T	OK	350.893	342.28	-0.0358555	-0.157906	Tellurite resistance protein
XLOC_000014	XLOC_000014	Scaffold_1:24195-26273	C	T	OK	652.519	677.842	0.0549278	0.218684	Arginine decarboxylase (EC 4.1.1.19) / Lysine decarboxylase (EC 4.1.1.18);Ontology_term
XLOC_000015	XLOC_000015	Scaffold_1:26347-26677	C	T	OK	287.24	304.153	0.082538	0.263211	protein from nitrogen regulatory protein P-II (GLNB) family%2C ortholog YAAQ B. subtilis
XLOC_000016	XLOC_000016	Scaffold_1:26715-27129	C	T	OK	125.418	95.6102	-0.391513	-1.19165	DUF327 domain-containing protein
XLOC_000017	XLOC_000017	Scaffold_1:27185-28130	C	T	OK	480.55	441.076	-0.12366	-0.554483	DNA polymerase III delta prime subunit (EC 2.7.7.7);Ontology_term
XLOC_000018	XLOC_000018	Scaffold_1:28132-28960	C	T	OK	245.272	264.13	0.106864	0.427717	Signal peptidase-like protein / Stage 0 sporulation protein YaaT
XLOC_000019	XLOC_000019	Scaffold_1:28974-29337	C	T	OK	77.4938	79.2071	0.031549	0.0840284	DNA replication intiation control protein YabA
XLOC_000020	XLOC_000020	Scaffold_1:29401-30145	C	T	OK	452.311	505.464	0.160293	0.706063	tRNA (adenine37-N(6))-methyltransferase TrmN6 (EC 2.1.1.223);Ontology_term
XLOC_000021	XLOC_000021	Scaffold_1:30182-31275	C	T	OK	591.545	605.55	0.0337576	0.0646088	COG2827: putative endonuclease containing a URI domain
XLOC_000022	XLOC_000022	Scaffold_1:32122-34111	C	T	OK	509.682	478.007	-0.0925645	-0.441511	Methionyl-tRNA synthetase (EC 6.1.1.10);Ontology_term
XLOC_000023	XLOC_000023	Scaffold_1:34194-34962	C	T	OK	557.476	508.616	-0.132333	-0.591416	Putative deoxyribonuclease YcfH
XLOC_000024	XLOC_000024	Scaffold_1:35206-36403	C	T	OK	317.778	314.444	-0.0152166	-0.0665164	Cell wall-binding protein
XLOC_000025	XLOC_000025	Scaffold_1:36570-38002	C	T	OK	810.372	880.308	0.119425	0.507992	Ribonuclease M5 (EC 3.1.26.8);Ontology_term
XLOC_000026	XLOC_000026	Scaffold_1:38143-39043	C	T	OK	327.433	325.03	-0.010626	-0.0462585	Sporulation-specific protease YabG
XLOC_000027	XLOC_000027	Scaffold_1:39267-39528	C	T	OK	213.736	187.907	-0.185813	-0.490113	Veg protein
XLOC_000028	XLOC_000028	Scaffold_1:39684-39870	C	T	OK	827.184	870.147	0.0730496	0.192363	small%2C acid-soluble spore protein
XLOC_000029	XLOC_000029	Scaffold_1:40156-41035	C	T	OK	303.423	277.326	-0.129751	-0.546562	4-diphosphocytidyl-2-C-methyl-D-erythritol kinase (EC 2.7.1.148);Ontology_term
XLOC_000030	XLOC_000030	Scaffold_1:41091-41925	C	T	OK	757.718	685.373	-0.14477	-0.671009	PurR: transcription regulator associated with purine metabolism
XLOC_000031	XLOC_000031	Scaffold_1:41942-42320	C	T	OK	733.017	791.487	0.110718	0.416243	YabJ%2C a purine regulatory protein and member of the highly conserved YjgF family
XLOC_000032	XLOC_000032	Scaffold_1:42638-42794	C	T	OK	78.2571	0	#NAME?	#NAME?	Protein of unknown function identified by role in sporulation (SpoVG)
XLOC_000033	XLOC_000033	Scaffold_1:43095-44466	C	T	OK	284.049	272.722	-0.058707	-0.266012	N-acetylglucosamine-1-phosphate uridyltransferase (EC 2.7.7.23) / Glucosamine-1-phosphate N-acetyltransferase (EC 2.3.1.157);Ontology_term
XLOC_000034	XLOC_000034	Scaffold_1:44486-45437	C	T	OK	289.681	258.223	-0.165844	-0.697189	Ribose-phosphate pyrophosphokinase (EC 2.7.6.1);Ontology_term
XLOC_000035	XLOC_000035	Scaffold_1:45517-46144	C	T	OK	182.424	163.174	-0.160884	-0.572783	LSU ribosomal protein L25p
XLOC_000036	XLOC_000036	Scaffold_1:46260-46827	C	T	OK	371.74	351.084	-0.0824799	-0.316808	Peptidyl-tRNA hydrolase (EC 3.1.1.29);Ontology_term
XLOC_000037	XLOC_000037	Scaffold_1:46883-47114	C	T	OK	128.404	153.659	0.25905	0.537669	Fin: required for the switch from sigmaF to sigmaG during sporulation
XLOC_000038	XLOC_000038	Scaffold_1:47178-50712	C	T	OK	467.303	451.44	-0.0498227	-0.242166	Transcription-repair coupling factor
XLOC_000039	XLOC_000039	Scaffold_1:50948-51386	C	T	OK	303.985	309.877	0.0276958	0.100957	Stage V sporulation protein T%2C AbrB family transcriptional regulator (SpoVT)
XLOC_000040	XLOC_000040	Scaffold_1:51610-54662	C	T	OK	1120.26	1109.65	-0.0137258	-0.0659481	FIG006789: Stage V sporulation protein%3B Low temperature requirement B protein
XLOC_000041	XLOC_000041	Scaffold_1:54668-54932	C	T	OK	60.8035	46.2761	-0.393885	-0.701973	Ribosome-associated heat shock protein implicated in the recycling of the 50S subunit (S4 paralog)
XLOC_000042	XLOC_000042	Scaffold_1:54993-55940	C	T	OK	1087.89	965.252	-0.172554	-0.619186	FIG007421: forespore shell protein
XLOC_000043	XLOC_000043	Scaffold_1:55956-56334	C	T	OK	155.99	157.349	0.0125129	0.0388405	Cell division protein DivIC (FtsB)%2C stabilizes FtsL against RasP cleavage
XLOC_000044	XLOC_000044	Scaffold_1:56413-56912	C	T	OK	498.207	348.193	-0.516859	-0.381683	RNA binding protein%2C contains ribosomal protein S1 domain
XLOC_000045	XLOC_000045	Scaffold_1:57328-59818	C	T	OK	362.479	363.5	0.00405515	0.0193414	Stage II sporulation serine phosphatase for sigma-F activation (SpoIIE)
XLOC_000046	XLOC_000046	Scaffold_1:59894-61635	C	T	OK	950.124	948.539	-0.00240754	-0.0110408	FIG124152: hypothetical protein
XLOC_000047	XLOC_000047	Scaffold_1:61737-63691	C	T	OK	755.942	748.264	-0.0147286	-0.0544893	tRNA(Ile)-lysidine synthetase (EC 6.3.4.19);Ontology_term
XLOC_000048	XLOC_000048	Scaffold_1:63787-65707	C	T	OK	423.124	429.188	0.0205277	0.0975061	Cell division protein FtsH (EC 3.4.24.-);Ontology_term
XLOC_000049	XLOC_000049	Scaffold_1:65907-66684	C	T	OK	542.487	478.679	-0.180529	-0.813567	Pantothenate kinase type III%2C CoaX-like (EC 2.7.1.33);Ontology_term
XLOC_000050	XLOC_000050	Scaffold_1:66695-67565	C	T	OK	250.933	269.767	0.104411	0.439279	Chaperonin (heat shock protein 33)
XLOC_000051	XLOC_000051	Scaffold_1:67617-68508	C	T	OK	274.539	248.094	-0.146121	-0.569551	Foldase protein PrsA precursor (EC 5.2.1.8);Ontology_term
XLOC_000052	XLOC_000052	Scaffold_1:68583-69507	C	T	OK	163.557	179.285	0.132458	0.51964	Cysteine synthase (EC 2.5.1.47);Ontology_term
XLOC_000053	XLOC_000053	Scaffold_1:69701-72582	C	T	OK	1535.11	1461.07	-0.0713189	-0.306884	Para-aminobenzoate synthase%2C aminase component (EC 2.6.1.85);Ontology_term
XLOC_000054	XLOC_000054	Scaffold_1:72587-74297	C	T	OK	924.582	893.787	-0.0488712	-0.184566	Dihydropteroate synthase (EC 2.5.1.15);Ontology_term
XLOC_000055	XLOC_000055	Scaffold_1:74474-75476	C	T	OK	417.624	434.645	0.0576307	0.257771	tRNA dihydrouridine synthase B (EC 1.-.-.-);Ontology_term
XLOC_000056	XLOC_000056	Scaffold_1:75557-77060	C	T	OK	380.832	354.022	-0.105315	-0.487061	Lysyl-tRNA synthetase (class II) (EC 6.1.1.6);Ontology_term
XLOC_000057	XLOC_000057	Scaffold_1:78573-79038	C	T	OK	402.269	353.465	-0.186593	-0.67197	Transcriptional regulator CtsR
XLOC_000058	XLOC_000058	Scaffold_1:79175-83127	C	T	OK	1169.94	1028.2	-0.186312	-0.580551	Nucleotide excision repair protein%2C with UvrB/UvrC motif
XLOC_000059	XLOC_000059	Scaffold_1:83302-84586	C	T	OK	574.076	519.423	-0.144332	-0.680255	DNA repair protein RadA
XLOC_000060	XLOC_000060	Scaffold_1:84589-85666	C	T	OK	375.905	358.621	-0.067911	-0.304735	DNA integrity scanning protein DisA
XLOC_000061	XLOC_000061	Scaffold_1:85681-86886	C	T	OK	446.166	390.079	-0.193815	-0.877554	hypothetical protein
XLOC_000062	XLOC_000062	Scaffold_1:86902-88067	C	T	OK	711.767	595.536	-0.257216	-1.08822	2-C-methyl-D-erythritol 4-phosphate cytidylyltransferase (EC 2.7.7.60);Ontology_term
XLOC_000063	XLOC_000063	Scaffold_1:88148-89606	C	T	OK	429.27	382.876	-0.16501	-0.766037	Glutamyl-tRNA synthetase (EC 6.1.1.17) @ Glutamyl-tRNA(Gln) synthetase (EC 6.1.1.24);Ontology_term
XLOC_000064	XLOC_000064	Scaffold_1:89766-90562	C	T	OK	648.963	523.983	-0.308614	-0.338636	hypothetical protein
XLOC_000065	XLOC_000065	Scaffold_1:90606-91962	C	T	OK	361.6	328.981	-0.136389	-0.626525	Cysteinyl-tRNA synthetase (EC 6.1.1.16);Ontology_term
XLOC_000066	XLOC_000066	Scaffold_1:91964-93127	C	T	OK	522.529	527.664	0.0141064	0.0581185	COG1939: Ribonuclease III family protein
XLOC_000067	XLOC_000067	Scaffold_1:93132-93645	C	T	OK	310.652	319.515	0.0405828	0.149022	Hypothetical protein DUF901%2C similar to C-terminal domain of ribosome protection-type Tc-resistance proteins
XLOC_000068	XLOC_000068	Scaffold_1:93708-94380	C	T	OK	723.421	579.421	-0.320223	-1.43927	RNA polymerase sporulation specific sigma factor SigH
XLOC_000069	XLOC_000069	Scaffold_1:94463-94613	C	T	NOTEST	0	0	0	0	LSU ribosomal protein L33p @ LSU ribosomal protein L33p%2C zinc-dependent
XLOC_000070	XLOC_000070	Scaffold_1:94648-94828	C	T	OK	116.601	159.486	0.451847	0.554665	Preprotein translocase subunit SecE (TC 3.A.5.1.1)
XLOC_000071	XLOC_000071	Scaffold_1:94998-95538	C	T	OK	220.049	243.547	0.146375	0.526419	Transcription antitermination protein NusG
XLOC_000072	XLOC_000072	Scaffold_1:95707-96133	C	T	OK	328.474	324.454	-0.0177638	-0.0613126	LSU ribosomal protein L11p (L12e)
XLOC_000073	XLOC_000073	Scaffold_1:96234-96933	C	T	OK	147.416	153.929	0.0623752	0.215206	LSU ribosomal protein L1p (L10Ae)
XLOC_000074	XLOC_000074	Scaffold_1:97194-97695	C	T	OK	188.021	161.235	-0.22173	-0.727851	LSU ribosomal protein L10p (P0)
XLOC_000075	XLOC_000075	Scaffold_1:97739-98111	C	T	OK	34.9093	37.6964	0.110815	0.241706	LSU ribosomal protein L7/L12 (P1/P2)
XLOC_000076	XLOC_000076	Scaffold_1:98250-98856	C	T	OK	494.8	500.057	0.0152466	0.0618484	Ribosomal RNA small subunit methyltransferase C (EC 2.1.1.52);Ontology_term
XLOC_000077	XLOC_000077	Scaffold_1:99247-102688	C	T	OK	351.574	314.837	-0.159219	-0.768662	DNA-directed RNA polymerase beta subunit (EC 2.7.7.6);Ontology_term
XLOC_000078	XLOC_000078	Scaffold_1:102747-106347	C	T	OK	290.896	278.699	-0.0617966	-0.296959	DNA-directed RNA polymerase beta' subunit (EC 2.7.7.6);Ontology_term
XLOC_000079	XLOC_000079	Scaffold_1:106464-106716	C	T	OK	316.884	211.122	-0.585879	-1.49259	Firmicutes ribosomal L7Ae family protein
XLOC_000080	XLOC_000080	Scaffold_1:106976-107237	C	T	OK	142.089	125.622	-0.177702	-0.423173	SSU ribosomal protein S12p (S23e)
XLOC_000081	XLOC_000081	Scaffold_1:107402-107873	C	T	OK	176.842	156.541	-0.17592	-0.573546	SSU ribosomal protein S7p (S5e)
XLOC_000082	XLOC_000082	Scaffold_1:107922-110001	C	T	OK	313.207	293.118	-0.0956348	-0.44766	Translation elongation factor G
XLOC_000083	XLOC_000083	Scaffold_1:110120-111311	C	T	OK	360.227	327.551	-0.137187	-0.604743	Translation elongation factor Tu
XLOC_000084	XLOC_000084	Scaffold_1:111948-112578	C	T	OK	539.011	505.434	-0.092791	-0.382038	LSU ribosomal protein L3p (L3e)
XLOC_000085	XLOC_000085	Scaffold_1:112926-113516	C	T	OK	396.55	397.03	0.00174549	0.00543	LSU ribosomal protein L4p (L1e)
XLOC_000086	XLOC_000086	Scaffold_1:113547-114381	C	T	OK	368.201	337.714	-0.124691	-0.514901	LSU ribosomal protein L2p (L8e)
XLOC_000087	XLOC_000087	Scaffold_1:114438-114717	C	T	OK	876.274	633.401	-0.468263	-1.55065	SSU ribosomal protein S19p (S15e)
XLOC_000088	XLOC_000088	Scaffold_1:115082-115739	C	T	OK	373.851	340.153	-0.136278	-0.519928	SSU ribosomal protein S3p (S3e)
XLOC_000089	XLOC_000089	Scaffold_1:115740-116365	C	T	OK	491.878	377.554	-0.381616	-0.589423	LSU ribosomal protein L16p (L10e)
XLOC_000090	XLOC_000090	Scaffold_1:116389-116653	C	T	OK	25.0194	37.4631	0.582423	0.792283	SSU ribosomal protein S17p (S11e)
XLOC_000091	XLOC_000091	Scaffold_1:117097-117409	C	T	OK	559.182	471.619	-0.245697	-0.826168	LSU ribosomal protein L24p (L26e)
XLOC_000092	XLOC_000092	Scaffold_1:117434-117974	C	T	OK	217.436	246.462	0.180774	0.62229	LSU ribosomal protein L5p (L11e)
XLOC_000093	XLOC_000093	Scaffold_1:117996-118182	C	T	OK	650.109	568.948	-0.192385	-0.41236	SSU ribosomal protein S14p (S29e) @ SSU ribosomal protein S14p (S29e)%2C zinc-dependent
XLOC_000094	XLOC_000094	Scaffold_1:118213-118612	C	T	OK	249.459	248.66	-0.00462646	-0.0152398	SSU ribosomal protein S8p (S15Ae)
XLOC_000095	XLOC_000095	Scaffold_1:118641-119178	C	T	OK	219.468	184.783	-0.24818	-0.854613	LSU ribosomal protein L6p (L9e)
XLOC_000096	XLOC_000096	Scaffold_1:119209-119572	C	T	OK	317.842	283.037	-0.167322	-0.547346	LSU ribosomal protein L18p (L5e)
XLOC_000097	XLOC_000097	Scaffold_1:119590-120097	C	T	OK	199.439	180.888	-0.140855	-0.483807	SSU ribosomal protein S5p (S2e)
XLOC_000098	XLOC_000098	Scaffold_1:120110-120290	C	T	OK	205.689	243.451	0.243165	0.364764	LSU ribosomal protein L30p (L7e)
XLOC_000099	XLOC_000099	Scaffold_1:120482-120761	C	T	OK	152.135	98.0506	-0.633752	-1.45585	LSU ribosomal protein L15p (L27Ae)
XLOC_000100	XLOC_000100	Scaffold_1:120762-122058	C	T	OK	442.544	410.641	-0.107943	-0.498585	Preprotein translocase secY subunit (TC 3.A.5.1.1)
XLOC_000101	XLOC_000101	Scaffold_1:122126-123508	C	T	OK	849.373	839.994	-0.0160197	-0.0721433	Adenylate kinase (EC 2.7.4.3);Ontology_term
XLOC_000102	XLOC_000102	Scaffold_1:123575-123848	C	T	OK	23.9772	40.7957	0.766757	1.12817	C-125 initiation factor IF-I%2C RNA polymerase alpha subunit and ribosomal proteins%2C partial and complete cds
XLOC_000103	XLOC_000103	Scaffold_1:124077-124191	C	T	OK	2448.38	1258.51	-0.960114	-0.445785	LSU ribosomal protein L36p
XLOC_000104	XLOC_000104	Scaffold_1:124599-124995	C	T	OK	360.528	366.873	0.0251686	0.0858442	SSU ribosomal protein S11p (S14e)
XLOC_000105	XLOC_000105	Scaffold_1:125169-126114	C	T	OK	256.153	226.655	-0.176506	-0.713259	DNA-directed RNA polymerase alpha subunit (EC 2.7.7.6);Ontology_term
XLOC_000106	XLOC_000106	Scaffold_1:126191-126554	C	T	OK	229.276	246.726	0.105828	0.339353	LSU ribosomal protein L17p
XLOC_000107	XLOC_000107	Scaffold_1:126695-127541	C	T	OK	195.459	221.493	0.180392	0.721165	ATPase component of general energizing module of ECF transporters
XLOC_000108	XLOC_000108	Scaffold_1:127555-129180	C	T	OK	429.442	512.98	0.256442	1.14505	ATPase component of general energizing module of ECF transporters
XLOC_000109	XLOC_000109	Scaffold_1:129190-129934	C	T	OK	289.331	280.749	-0.0434398	-0.170524	tRNA pseudouridine synthase A (EC 4.2.1.70);Ontology_term
XLOC_000110	XLOC_000110	Scaffold_1:130257-130533	C	T	OK	106.662	145.888	0.45182	0.996162	LSU ribosomal protein L13p (L13Ae)
XLOC_000111	XLOC_000111	Scaffold_1:130640-130946	C	T	OK	241.363	210.768	-0.19555	-0.587527	SSU ribosomal protein S9p (S16e)
XLOC_000112	XLOC_000112	Scaffold_1:131567-133106	C	T	OK	292.24	304.498	0.0592789	0.267843	internalin%2C putative
XLOC_000113	XLOC_000113	Scaffold_1:133220-133664	C	T	OK	181.874	197.308	0.117508	0.390915	FIG01226937: hypothetical protein
XLOC_000114	XLOC_000114	Scaffold_1:133748-134462	C	T	OK	329.862	345.421	0.0664932	0.275716	Germination-specific N-acetylmuramoyl-L-alanine amidase (EC 3.5.1.28)%2C cell wall hydrolase CwlD;Ontology_term
XLOC_000115	XLOC_000115	Scaffold_1:134547-135609	C	T	OK	362.845	369.631	0.0267314	0.120191	Scaffold protein for [4Fe-4S] cluster assembly ApbC%2C MRP-like
XLOC_000116	XLOC_000116	Scaffold_1:136357-136957	C	T	OK	553.735	577.75	0.0612505	0.261533	KinB signaling pathway activation protein
XLOC_000117	XLOC_000117	Scaffold_1:138210-138378	C	T	NOTEST	0	0	0	0	hypothetical protein
XLOC_000118	XLOC_000118	Scaffold_1:138829-139747	C	T	OK	328.309	331.232	0.0127864	0.0556608	Vancomycin B-type resistance protein VanW
XLOC_000119	XLOC_000119	Scaffold_1:139863-140313	C	T	OK	153.112	168.633	0.139299	0.455597	Holin associated hypothetical protein
XLOC_000120	XLOC_000120	Scaffold_1:140702-141164	C	T	OK	225.784	222.482	-0.0212576	-0.072477	FIG01249237: hypothetical protein
XLOC_000121	XLOC_000121	Scaffold_1:142340-142955	C	T	OK	45.0554	53.922	0.259174	0.775536	Transcriptional regulator%2C TetR family
XLOC_000122	XLOC_000122	Scaffold_1:142970-145595	C	T	OK	239.792	295.708	0.302391	1.43171	Phosphoenolpyruvate synthase (EC 2.7.9.2);Ontology_term
XLOC_000123	XLOC_000123	Scaffold_1:147335-148811	C	T	OK	139.597	182.622	0.3876	1.65064	para-nitrobenzyl esterase (intracellular esterase B)
XLOC_000124	XLOC_000124	Scaffold_1:150478-151159	C	T	OK	142.426	229.174	0.686234	2.47223	Phage shock protein A
XLOC_000125	XLOC_000125	Scaffold_1:151194-152987	C	T	OK	356.881	450.115	0.334852	1.40653	Primosomal protein N' (replication factor Y) - superfamily II helicase
XLOC_000126	XLOC_000126	Scaffold_1:153007-153982	C	T	OK	184.092	199.376	0.115068	0.455178	hypothetical protein
XLOC_000127	XLOC_000127	Scaffold_1:154218-155274	C	T	OK	201.969	227.671	0.172814	0.747723	putative oxidoreductase protein
XLOC_000128	XLOC_000128	Scaffold_1:156284-156917	C	T	OK	303.311	359.185	0.243926	0.937375	L-lysine permease
XLOC_000129	XLOC_000129	Scaffold_1:157110-157755	C	T	OK	278.3	282.29	0.0205386	0.0769793	conserved membrane protein YkvA
XLOC_000130	XLOC_000130	Scaffold_1:157770-160067	C	T	OK	635.79	745.634	0.229917	1.08181	Cell division protein FtsW
XLOC_000131	XLOC_000131	Scaffold_1:161252-162302	C	T	OK	365.341	413.864	0.179912	0.80567	Transcriptional regulator%2C DeoR family
XLOC_000132	XLOC_000132	Scaffold_1:162491-163169	C	T	OK	289.376	330.044	0.189712	0.720835	FIG01246197: hypothetical protein
XLOC_000133	XLOC_000133	Scaffold_1:163240-164620	C	T	OK	189.276	209.738	0.148099	0.636139	Peptidoglycan N-acetylglucosamine deacetylase (EC 3.5.1.-);Ontology_term
XLOC_000134	XLOC_000134	Scaffold_1:164624-166289	C	T	OK	503.689	510.299	0.0188102	0.0895897	Cytoplasmic alpha-amylase (EC 3.2.1.1);Ontology_term
XLOC_000135	XLOC_000135	Scaffold_1:166456-167407	C	T	OK	245.634	252.901	0.0420619	0.17166	Maltose operon transcriptional repressor MalR%2C LacI family
XLOC_000136	XLOC_000136	Scaffold_1:167522-169286	C	T	OK	335.059	359.94	0.103341	0.484563	Neopullulanase (EC 3.2.1.135);Ontology_term
XLOC_000137	XLOC_000137	Scaffold_1:169380-170634	C	T	OK	354.85	381.691	0.105196	0.487579	Maltose/maltodextrin ABC transporter%2C substrate binding periplasmic protein MalE
XLOC_000138	XLOC_000138	Scaffold_1:170675-171983	C	T	OK	618.925	612.401	-0.0152866	-0.0726166	Maltose/maltodextrin ABC transporter%2C permease protein MalF
XLOC_000139	XLOC_000139	Scaffold_1:171983-172835	C	T	OK	309.19	361.017	0.22357	0.952862	Maltose/maltodextrin ABC transporter%2C permease protein MalG
XLOC_000140	XLOC_000140	Scaffold_1:172839-178363	C	T	OK	1483.24	1426	-0.0567773	-0.23349	Maltodextrose utilization protein MalA
XLOC_000141	XLOC_000141	Scaffold_1:181848-182268	C	T	OK	167.967	196.924	0.229463	0.752322	YdjM
XLOC_000142	XLOC_000142	Scaffold_1:182324-183344	C	T	OK	350.72	363.524	0.0517329	0.224763	YdjN
XLOC_000143	XLOC_000143	Scaffold_1:185448-185997	C	T	OK	197.742	168.78	-0.228482	-0.792183	Signal peptidase I (EC 3.4.21.89);Ontology_term
XLOC_000144	XLOC_000144	Scaffold_1:186133-186778	C	T	OK	382.174	450.966	0.238786	1.00244	Conserved protein YhfK
XLOC_000145	XLOC_000145	Scaffold_1:189618-190626	C	T	OK	512.931	506.184	-0.0191015	-0.0885108	FIG01253573: hypothetical protein
XLOC_000146	XLOC_000146	Scaffold_1:192033-192906	C	T	OK	557.711	548.597	-0.0237702	-0.108228	YeaB (Cation efflux protein)
XLOC_000147	XLOC_000147	Scaffold_1:193061-195235	C	T	OK	866.88	810.26	-0.0974466	-0.450436	FIG022979: MoxR-like ATPases
XLOC_000148	XLOC_000148	Scaffold_1:195239-197465	C	T	OK	364.601	396.046	0.119349	0.569655	FIG001454: Transglutaminase-like enzymes%2C putative cysteine proteases
XLOC_000149	XLOC_000149	Scaffold_1:197653-199195	C	T	OK	368.755	390.252	0.0817429	0.379634	GMP synthase [glutamine-hydrolyzing] (EC 6.3.5.2);Ontology_term
XLOC_000150	XLOC_000150	Scaffold_1:199214-199430	C	T	OK	76.3208	72.4252	-0.0755843	-0.135536	hypothetical protein
XLOC_000151	XLOC_000151	Scaffold_1:199486-199624	C	T	OK	1061.29	813.249	-0.384046	-0.454588	hypothetical protein
XLOC_000152	XLOC_000152	Scaffold_1:199627-199786	C	T	OK	486.031	639.401	0.395674	0.645446	hypothetical protein
XLOC_000153	XLOC_000153	Scaffold_1:200028-201459	C	T	OK	392.558	371.858	-0.0781557	-0.363505	Hypoxanthine/guanine permease PbuG
XLOC_000154	XLOC_000154	Scaffold_1:201462-201597	C	T	OK	0	138.95	inf	#NAME?	hypothetical protein
XLOC_000155	XLOC_000155	Scaffold_1:201676-202432	C	T	OK	345.083	336.84	-0.0348797	-0.144801	YebC
XLOC_000156	XLOC_000156	Scaffold_1:202540-202729	C	T	OK	262.961	640.631	1.28464	2.55891	FIG01235682: hypothetical protein
XLOC_000157	XLOC_000157	Scaffold_1:202915-203667	C	T	OK	201.885	188.055	-0.102385	-0.147433	FIG00774849: hypothetical protein
XLOC_000158	XLOC_000158	Scaffold_1:203984-206900	C	T	OK	633.746	620.556	-0.0303422	-0.121683	Phosphoribosylaminoimidazole carboxylase catalytic subunit (EC 4.1.1.21);Ontology_term
XLOC_000159	XLOC_000159	Scaffold_1:206974-207691	C	T	OK	187.076	213.26	0.188991	0.699898	Phosphoribosylaminoimidazole-succinocarboxamide synthase (EC 6.3.2.6);Ontology_term
XLOC_000160	XLOC_000160	Scaffold_1:207692-212245	C	T	OK	1462.31	1506.95	0.0433752	0.0942029	Phosphoribosylformylglycinamidine synthase%2C PurS subunit (EC 6.3.5.3);Ontology_term
XLOC_000161	XLOC_000161	Scaffold_1:212366-215529	C	T	OK	1282.91	1304.32	0.023872	0.102797	Phosphoribosylformylglycinamidine cyclo-ligase (EC 6.3.3.1);Ontology_term
XLOC_000162	XLOC_000162	Scaffold_1:215542-216811	C	T	OK	299.827	296.754	-0.0148602	-0.0673611	Phosphoribosylamine--glycine ligase (EC 6.3.4.13);Ontology_term
XLOC_000163	XLOC_000163	Scaffold_1:217576-218800	C	T	OK	368.859	386.985	0.0692069	0.314681	putative cytochrome P450 hydroxylase
XLOC_000164	XLOC_000164	Scaffold_1:218894-219065	C	T	OK	20.6432	74.919	1.85967	0.961	hypothetical protein
XLOC_000165	XLOC_000165	Scaffold_1:219578-220025	C	T	OK	475.614	474.514	-0.00334175	-0.0128236	YybP
XLOC_000166	XLOC_000166	Scaffold_1:220141-220267	C	T	NOTEST	0	0	0	0	Mobile element protein
XLOC_000167	XLOC_000167	Scaffold_1:220393-220528	C	T	NOTEST	0	0	0	0	hypothetical protein
XLOC_000168	XLOC_000168	Scaffold_1:220963-222703	C	T	OK	266.566	261.653	-0.0268364	-0.123451	Adenine deaminase (EC 3.5.4.2);Ontology_term
XLOC_000169	XLOC_000169	Scaffold_1:222728-223718	C	T	OK	284.575	258.06	-0.141102	-0.601034	FIG00895120: hypothetical protein
XLOC_000170	XLOC_000170	Scaffold_1:223720-224032	C	T	OK	146.135	158.925	0.121047	0.343959	His repressor
XLOC_000171	XLOC_000171	Scaffold_1:224182-224869	C	T	OK	362.381	340.838	-0.088422	-0.365378	Geranylgeranylglyceryl phosphate synthase-like protein YerE
XLOC_000172	XLOC_000172	Scaffold_1:224928-227148	C	T	OK	262.138	274.915	0.0686575	0.323246	ATP-dependent DNA helicase UvrD/PcrA
XLOC_000173	XLOC_000173	Scaffold_1:227182-229186	C	T	OK	292.387	280.892	-0.0578626	-0.271852	DNA ligase (EC 6.5.1.2);Ontology_term
XLOC_000174	XLOC_000174	Scaffold_1:229201-230392	C	T	OK	416.631	402.554	-0.0495891	-0.229675	Putative pheromone cAM373 precursor lipoprotein CamS
XLOC_000175	XLOC_000175	Scaffold_1:230583-231510	C	T	OK	323.702	318.36	-0.0240098	-0.0988649	Hypothetical protein YhfZ
XLOC_000176	XLOC_000176	Scaffold_1:231656-231971	C	T	OK	127.939	146.194	0.192433	0.52831	Protein containing PTS-regulatory domain
XLOC_000177	XLOC_000177	Scaffold_1:231983-232343	C	T	OK	180.255	209.687	0.218196	0.706876	FIG128630: Hypothetical protein
XLOC_000178	XLOC_000178	Scaffold_1:232343-232463	C	T	NOTEST	0	0	0	0	hypothetical protein
XLOC_000179	XLOC_000179	Scaffold_1:232596-233790	C	T	OK	324.912	325.94	0.00455716	0.0200723	FIG006427: Putative transport system permease protein
XLOC_000180	XLOC_000180	Scaffold_1:233816-234701	C	T	OK	295.575	291.74	-0.0188419	-0.076656	Phosphotriesterase like protein
XLOC_000181	XLOC_000181	Scaffold_1:234802-235846	C	T	OK	228.656	253.36	0.14801	0.602604	Aspartate aminotransferase family
XLOC_000182	XLOC_000182	Scaffold_1:235889-238216	C	T	OK	662.796	652.101	-0.0234689	-0.109617	Phosphopentomutase like (EC 5.4.2.7);Ontology_term
XLOC_000183	XLOC_000183	Scaffold_1:238358-239087	C	T	OK	206.939	206.341	-0.00417283	-0.0150792	Glucosamine-6-phosphate deaminase (EC 3.5.99.6);Ontology_term
XLOC_000184	XLOC_000184	Scaffold_1:242184-242475	C	T	OK	119.332	162.615	0.446482	1.17246	Aspartyl-tRNA(Asn) amidotransferase subunit C (EC 6.3.5.6) @ Glutamyl-tRNA(Gln) amidotransferase subunit C (EC 6.3.5.7);Ontology_term
XLOC_000185	XLOC_000185	Scaffold_1:242497-243955	C	T	OK	175.467	204.068	0.217843	0.956781	Aspartyl-tRNA(Asn) amidotransferase subunit A (EC 6.3.5.6) @ Glutamyl-tRNA(Gln) amidotransferase subunit A (EC 6.3.5.7);Ontology_term
XLOC_000186	XLOC_000186	Scaffold_1:243968-245399	C	T	OK	200.293	223.405	0.157549	0.691554	Aspartyl-tRNA(Asn) amidotransferase subunit B (EC 6.3.5.6) @ Glutamyl-tRNA(Gln) amidotransferase subunit B (EC 6.3.5.7);Ontology_term
XLOC_000187	XLOC_000187	Scaffold_1:245566-246147	C	T	OK	169.853	212.76	0.324944	0.898534	FIG01230714: hypothetical protein
XLOC_000188	XLOC_000188	Scaffold_1:248419-251578	C	T	OK	97.9952	113.582	0.212956	0.949276	Swarming motility protein SwrC
XLOC_000189	XLOC_000189	Scaffold_1:251709-251910	C	T	OK	213.013	147.832	-0.526983	-0.918931	hypothetical protein
XLOC_000190	XLOC_000190	Scaffold_1:253706-254621	C	T	OK	261.144	293.54	0.168711	0.714017	Transcription regulator [contains diacylglycerol kinase catalytic domain]
XLOC_000191	XLOC_000191	Scaffold_1:254669-256052	C	T	OK	259.487	305.193	0.23406	1.06355	RNA methyltransferase%2C TrmA family
XLOC_000192	XLOC_000192	Scaffold_1:256203-256665	C	T	OK	70.3954	70.9072	0.0104522	0.0309284	hypothetical protein( EC:3.1.21.- );Ontology_term
XLOC_000193	XLOC_000193	Scaffold_1:261362-262040	C	T	OK	405.25	403.99	-0.00449342	-0.0183708	Phage protein
XLOC_000194	XLOC_000194	Scaffold_1:262176-262383	C	T	OK	57.1261	81.5958	0.514346	0.666438	Phage-like element PBSX protein xtrA
XLOC_000195	XLOC_000195	Scaffold_1:263862-264246	C	T	OK	917.917	921.287	0.00528688	0.021327	FIG01246885: hypothetical protein
XLOC_000196	XLOC_000196	Scaffold_1:266684-266813	C	T	OK	2319.51	932.453	-1.31472	-1.18316	hypothetical protein
XLOC_000197	XLOC_000197	Scaffold_1:269469-269991	C	T	OK	942.075	881.14	-0.0964697	-0.428951	DNA methylase
XLOC_000198	XLOC_000198	Scaffold_1:270705-272571	C	T	OK	310.445	287.559	-0.110483	-0.513861	PTS system%2C beta-glucoside-specific IIB component (EC 2.7.1.69) / PTS system%2C beta-glucoside-specific IIC component (EC 2.7.1.69) / PTS system%2C beta-glucoside-specific IIA component (EC 2.7.1.69);Ontology_term
XLOC_000199	XLOC_000199	Scaffold_1:272573-274043	C	T	OK	440.54	402.397	-0.130651	-0.607517	6-phospho-beta-glucosidase (EC 3.2.1.86);Ontology_term
XLOC_000200	XLOC_000200	Scaffold_1:274072-274921	C	T	OK	278.3	271.858	-0.033789	-0.133667	Beta-glucoside bgl operon antiterminator%2C BglG family
XLOC_000201	XLOC_000201	Scaffold_1:275169-276401	C	T	OK	876.636	388.028	-1.17582	-0.216042	response regulator aspartate phosphatase
XLOC_000202	XLOC_000202	Scaffold_1:276561-277320	C	T	OK	418.528	429.033	0.0357656	0.153109	Methyltransferase (EC 2.1.1.-);Ontology_term
XLOC_000203	XLOC_000203	Scaffold_1:277498-280372	C	T	OK	279.308	266.836	-0.0659083	-0.31067	Putative superfamily I DNA helicases
XLOC_000204	XLOC_000204	Scaffold_1:280392-281443	C	T	OK	238.617	227.575	-0.0683572	-0.263523	Transporter
XLOC_000205	XLOC_000205	Scaffold_1:282536-283958	C	T	OK	588.056	565.171	-0.0572654	-0.271658	Transcriptional regulator%2C GntR family domain / Aspartate aminotransferase (EC 2.6.1.1);Ontology_term
XLOC_000206	XLOC_000206	Scaffold_1:284059-284977	C	T	OK	504.325	572.654	0.183309	0.837852	FIG01243460: hypothetical protein
XLOC_000207	XLOC_000207	Scaffold_1:285096-285816	C	T	OK	381.792	412.67	0.112204	0.467799	FIG007491: hypothetical protein YeeN
XLOC_000208	XLOC_000208	Scaffold_1:285960-286477	C	T	OK	303.346	435.781	0.52264	1.13812	Predicted transcriptional regulator
XLOC_000209	XLOC_000209	Scaffold_1:286635-288093	C	T	OK	221.809	246.104	0.149951	0.677313	Aldehyde dehydrogenase (EC 1.2.1.3);Ontology_term
XLOC_000210	XLOC_000210	Scaffold_1:288109-288961	C	T	OK	147.618	164.019	0.151993	0.579685	Methyl-accepting chemotaxis protein
XLOC_000211	XLOC_000211	Scaffold_1:290168-290774	C	T	OK	78.8299	99.8107	0.340451	1.08993	Transcriptional regulator%2C TetR family
XLOC_000212	XLOC_000212	Scaffold_1:290815-292346	C	T	OK	263.356	301.198	0.193698	0.862943	hypothetical protein
XLOC_000213	XLOC_000213	Scaffold_1:292430-294320	C	T	OK	200.698	258.375	0.36444	1.68058	COG0488: ATPase components of ABC transporters with duplicated ATPase domains
XLOC_000214	XLOC_000214	Scaffold_1:295387-296165	C	T	OK	281.328	385.238	0.453498	0.162802	ThiJ/PfpI domain protein
XLOC_000215	XLOC_000215	Scaffold_1:297517-300297	C	T	OK	470.615	548.033	0.219717	1.0051	probable monooxygenase
XLOC_000216	XLOC_000216	Scaffold_1:300362-301565	C	T	OK	409.596	438.048	0.0968878	0.449427	Putative metal chaperone%2C involved in Zn homeostasis%2C GTPase of COG0523 family
XLOC_000217	XLOC_000217	Scaffold_1:301746-306703	C	T	OK	1524.87	1656.96	0.119853	0.550721	Pimeloyl-CoA synthase (EC 6.2.1.14);Ontology_term
XLOC_000218	XLOC_000218	Scaffold_1:306720-307917	C	T	OK	421.775	467.244	0.147703	0.684501	putative cytochrome P450 hydroxylase
XLOC_000219	XLOC_000219	Scaffold_1:308948-309371	C	T	OK	139.042	147.278	0.0830231	0.270279	HTH-type transcriptional regulator yfmP
XLOC_000220	XLOC_000220	Scaffold_1:309460-310615	C	T	OK	688.098	665.394	-0.0484061	-0.229333	L-Proline/Glycine betaine transporter ProP
XLOC_000221	XLOC_000221	Scaffold_1:312596-313727	C	T	OK	187.442	207.997	0.150121	0.625393	ATP-dependent RNA helicase YfmL
XLOC_000222	XLOC_000222	Scaffold_1:315428-315776	C	T	OK	262.359	253.718	-0.0483197	-0.158508	FIG01226121: hypothetical protein
XLOC_000223	XLOC_000223	Scaffold_1:315884-315998	C	T	NOTEST	0	0	0	0	hypothetical protein
XLOC_000224	XLOC_000224	Scaffold_1:316054-317491	C	T	OK	377.727	374.83	-0.0111091	-0.0517782	2-oxoglutarate/malate translocator
XLOC_000225	XLOC_000225	Scaffold_1:317638-318217	C	T	OK	213.135	254.158	0.253958	0.887403	putative permease
XLOC_000226	XLOC_000226	Scaffold_1:319164-319944	C	T	OK	355.818	372.067	0.0644233	0.278566	YflN
XLOC_000227	XLOC_000227	Scaffold_1:320151-321795	C	T	OK	262.622	282.213	0.103796	0.478357	FIG01246635: hypothetical protein
XLOC_000228	XLOC_000228	Scaffold_1:321923-323021	C	T	OK	396.807	428.653	0.111371	0.514036	Nitric oxide synthase oxygenase (EC 1.-.-.-);Ontology_term
XLOC_000229	XLOC_000229	Scaffold_1:323036-324071	C	T	OK	249.276	265.039	0.088456	0.367656	Putative peptidoglycan hydrolase YvbX%2C NOT involved in spore germination
XLOC_000230	XLOC_000230	Scaffold_1:325495-326173	C	T	OK	306.521	377.617	0.300939	1.26254	Uncharacterized protein conserved in bacteria
XLOC_000231	XLOC_000231	Scaffold_1:329815-330193	C	T	OK	59.842	90.4707	0.596294	1.71841	FIG01230294: hypothetical protein
XLOC_000232	XLOC_000232	Scaffold_1:330263-331676	C	T	OK	75.4911	134.888	0.837387	3.33441	Na(+)-linked D-alanine glycine permease
XLOC_000233	XLOC_000233	Scaffold_1:331863-333276	C	T	OK	109.315	143.726	0.394826	1.57689	PTS system%2C trehalose-specific IIB component (EC 2.7.1.69) / PTS system%2C trehalose-specific IIC component (EC 2.7.1.69);Ontology_term
XLOC_000234	XLOC_000234	Scaffold_1:333336-335037	C	T	OK	116.668	179.986	0.625477	2.69773	Trehalose-6-phosphate hydrolase (EC 3.2.1.93);Ontology_term
XLOC_000235	XLOC_000235	Scaffold_1:335058-335775	C	T	OK	81.4401	121.288	0.574629	1.95002	Trehalose operon transcriptional repressor
XLOC_000236	XLOC_000236	Scaffold_1:335881-336574	C	T	OK	92.5234	131.376	0.505814	1.7425	UDP-3-O-[3-hydroxymyristoyl] glucosamine N-acyltransferase (EC 2.3.1.191);Ontology_term
XLOC_000237	XLOC_000237	Scaffold_1:336700-338044	C	T	OK	59.2664	79.8074	0.429307	1.594	Flagellar hook-length control protein FliK
XLOC_000238	XLOC_000238	Scaffold_1:342844-344431	C	T	OK	42.7833	58.0912	0.441271	1.59089	Flagellar hook-length control protein FliK
XLOC_000239	XLOC_000239	Scaffold_1:353518-354580	C	T	OK	309.473	342.971	0.148273	0.658864	Glycosyl transferase%2C group 2 family protein
XLOC_000240	XLOC_000240	Scaffold_1:354701-356872	C	T	OK	520.466	618.013	0.247831	1.15992	DegT/DnrJ/EryC1/StrS family protein
XLOC_000241	XLOC_000241	Scaffold_1:356957-358253	C	T	OK	311.044	358.046	0.203028	0.935996	UDP-glucose dehydrogenase (EC 1.1.1.22);Ontology_term
XLOC_000242	XLOC_000242	Scaffold_1:358354-359634	C	T	OK	186.139	214.855	0.206978	0.791446	Predicted hydrolase from alpha/beta family%2C YQKD B.subtilis ortholog
XLOC_000243	XLOC_000243	Scaffold_1:359764-360448	C	T	OK	72.4819	113.433	0.646146	2.16389	Oxygen-insensitive NAD(P)H nitroreductase (EC 1.-.-.-) / Dihydropteridine reductase (EC 1.5.1.34);Ontology_term
XLOC_000244	XLOC_000244	Scaffold_1:365056-365572	C	T	OK	110.201	185.338	0.750026	2.49839	ThiJ/PfpI family protein
XLOC_000245	XLOC_000245	Scaffold_1:367459-367930	C	T	OK	60.6879	70.6371	0.219018	0.679332	Low molecular weight protein tyrosine phosphatase (EC 3.1.3.48);Ontology_term
XLOC_000246	XLOC_000246	Scaffold_1:367953-369116	C	T	OK	203.411	234.343	0.204224	0.639975	Hypothetical protein YfkI
XLOC_000247	XLOC_000247	Scaffold_1:370606-370987	C	T	OK	304.851	328.213	0.106525	0.368296	OsmC/Ohr family protein
XLOC_000248	XLOC_000248	Scaffold_1:371091-372147	C	T	OK	396.883	424.311	0.0964103	0.444649	Calcium/proton antiporter
XLOC_000249	XLOC_000249	Scaffold_1:372213-373005	C	T	OK	280.494	302.148	0.107285	0.434973	FIG01226204: hypothetical protein
XLOC_000250	XLOC_000250	Scaffold_1:374545-374731	C	T	OK	95.8526	53.8793	-0.831088	-0.851402	FIG01226681: hypothetical protein
XLOC_000251	XLOC_000251	Scaffold_1:374837-375632	C	T	OK	370.116	380.826	0.0411549	0.172157	Polysaccharide deacetylase
XLOC_000252	XLOC_000252	Scaffold_1:375806-376910	C	T	OK	318.141	345.287	0.118128	0.526443	Glycerol dehydrogenase (EC 1.1.1.6);Ontology_term
XLOC_000253	XLOC_000253	Scaffold_1:378737-379704	C	T	OK	570.866	648.481	0.183914	0.0949448	hypothetical protein
XLOC_000254	XLOC_000254	Scaffold_1:379721-381113	C	T	OK	272.61	272.016	-0.00315062	-0.0142476	RNA methyltransferase%2C TrmA family
XLOC_000255	XLOC_000255	Scaffold_1:381160-381634	C	T	OK	405.299	479.748	0.243291	0.942132	FIG01253432: hypothetical protein
XLOC_000256	XLOC_000256	Scaffold_1:381705-382898	C	T	OK	911.834	823.362	-0.147244	-0.290929	hypothetical protein
XLOC_000257	XLOC_000257	Scaffold_1:382899-383625	C	T	OK	551.537	479.895	-0.200737	-0.851744	alternate gene name: yztA
XLOC_000258	XLOC_000258	Scaffold_1:384337-385531	C	T	OK	632.465	570.528	-0.148687	-0.698169	glycosyl transferase%2C putative
XLOC_000259	XLOC_000259	Scaffold_1:385828-386152	C	T	OK	167.496	152.588	-0.134484	-0.389667	YckD
XLOC_000260	XLOC_000260	Scaffold_1:386255-387461	C	T	OK	551.792	517.484	-0.0926084	-0.437245	Niacin transporter NiaP
XLOC_000261	XLOC_000261	Scaffold_1:387510-388194	C	T	OK	184.314	166.183	-0.149398	-0.52659	alternate gene name: yztA
XLOC_000262	XLOC_000262	Scaffold_1:388508-389885	C	T	OK	566.283	513.93	-0.139952	-0.662702	PTS system%2C sucrose-specific IIB component (EC 2.7.1.69) / PTS system%2C sucrose-specific IIC component (EC 2.7.1.69);Ontology_term
XLOC_000263	XLOC_000263	Scaffold_1:389927-390770	C	T	OK	228.071	261.688	0.198366	0.796951	Beta-glucoside bgl operon antiterminator%2C BglG family
XLOC_000264	XLOC_000264	Scaffold_1:397053-398028	C	T	OK	586.524	548.131	-0.0976691	-0.458622	Acetoin dehydrogenase E1 component alpha-subunit (EC 1.2.4.-);Ontology_term
XLOC_000265	XLOC_000265	Scaffold_1:398049-399084	C	T	OK	384.345	377.852	-0.0245816	-0.113013	Acetoin dehydrogenase E1 component beta-subunit (EC 1.2.4.-);Ontology_term
XLOC_000266	XLOC_000266	Scaffold_1:399106-400234	C	T	OK	545.96	527.598	-0.0493571	-0.230592	Dihydrolipoamide acetyltransferase component (E2) of acetoin dehydrogenase complex (EC 2.3.1.-);Ontology_term
XLOC_000267	XLOC_000267	Scaffold_1:400252-401629	C	T	OK	496.037	481.247	-0.0436702	-0.207174	Dihydrolipoamide dehydrogenase of acetoin dehydrogenase (EC 1.8.1.4);Ontology_term
XLOC_000268	XLOC_000268	Scaffold_1:401731-403890	C	T	OK	386.537	365.822	-0.0794636	-0.34875	Transcriptional activator of acetoin dehydrogenase operon AcoR
XLOC_000269	XLOC_000269	Scaffold_1:404075-405425	C	T	OK	360.533	409.673	0.184343	0.856099	Maltose-6'-phosphate glucosidase (EC 3.2.1.122);Ontology_term
XLOC_000270	XLOC_000270	Scaffold_1:405529-406303	C	T	OK	496.207	477.974	-0.0540111	-0.236698	Transcriptional regulator%2C RpiR family
XLOC_000271	XLOC_000271	Scaffold_1:406321-407911	C	T	OK	320.846	308.288	-0.0576016	-0.266853	PTS system%2C maltose and glucose-specific IIC component (EC 2.7.1.69) / PTS system%2C maltose and glucose-specific IIB component (EC 2.7.1.69);Ontology_term
XLOC_000273	XLOC_000273	Scaffold_1:411896-415874	C	T	OK	1163.58	1029.73	-0.176313	-0.811598	Beta-xylosidase (EC 3.2.1.37);Ontology_term
XLOC_000274	XLOC_000274	Scaffold_1:415924-417397	C	T	OK	292.949	276.095	-0.0854855	-0.391667	lipoprotein
XLOC_000275	XLOC_000275	Scaffold_1:417525-418727	C	T	OK	478.539	532.897	0.15522	0.637554	NAD(P)H dehydrogenase%2C quinone family( EC:1.6.99.2 );Ontology_term
XLOC_000276	XLOC_000276	Scaffold_1:418741-419272	C	T	OK	455.599	418.721	-0.121773	-0.487448	FIG01231644: hypothetical protein
XLOC_000277	XLOC_000277	Scaffold_1:419452-422005	C	T	OK	553.141	529.713	-0.0624353	-0.302566	L-O-lysylphosphatidylglycerol synthase (EC 2.3.2.3);Ontology_term
XLOC_000278	XLOC_000278	Scaffold_1:422117-423014	C	T	OK	338.365	327.427	-0.0474065	-0.208947	Phenazine biosynthesis protein PhzF like
XLOC_000279	XLOC_000279	Scaffold_1:423116-423695	C	T	OK	335.156	358.653	0.0977589	0.378961	Putative nitroreductase family protein SACOL0874
XLOC_000280	XLOC_000280	Scaffold_1:425886-426729	C	T	OK	219.273	218.702	-0.00376603	-0.0145222	regulatory protein RecX
XLOC_000281	XLOC_000281	Scaffold_1:426733-427048	C	T	OK	357.541	288.156	-0.311259	-1.00657	Transcription regulator CDS_ID OB0894
XLOC_000282	XLOC_000282	Scaffold_1:427554-427824	C	T	OK	988.454	814.437	-0.279371	-0.964033	Conserved protein YfhJ
XLOC_000283	XLOC_000283	Scaffold_1:428215-428347	C	T	OK	90.1163	0	#NAME?	#NAME?	hypothetical protein
XLOC_000284	XLOC_000284	Scaffold_1:428566-433458	C	T	OK	732.471	733.981	0.00296987	0.00848199	stress response protein
XLOC_000285	XLOC_000285	Scaffold_1:433667-434750	C	T	OK	389.646	337.232	-0.208423	-0.951291	A/G-specific adenine glycosylase (EC 3.2.2.-);Ontology_term
XLOC_000286	XLOC_000286	Scaffold_1:435082-435835	C	T	OK	700.01	687.753	-0.0254846	-0.11621	Enoyl-[acyl-carrier-protein] reductase [NADPH] (EC 1.3.1.10);Ontology_term
XLOC_000287	XLOC_000287	Scaffold_1:435903-436068	C	T	OK	63.0691	150.83	1.25792	0.88582	Small acid-soluble spore protein%2C gamma-type SASP
XLOC_000288	XLOC_000288	Scaffold_1:436243-436489	C	T	OK	157.153	110.982	-0.50184	-1.25342	FIG01225283: hypothetical protein
XLOC_000289	XLOC_000289	Scaffold_1:436652-437183	C	T	OK	290.375	274.683	-0.0801497	-0.288468	Cysteinyl-tRNA synthetase related protein
XLOC_000290	XLOC_000290	Scaffold_1:437279-439001	C	T	OK	323.834	313.14	-0.0484468	-0.224709	Lipid A export ATP-binding/permease protein MsbA
XLOC_000291	XLOC_000291	Scaffold_1:439131-442660	C	T	OK	1245.15	1198.61	-0.054949	-0.251983	Oligopeptide transport system permease protein OppB (TC 3.A.1.5.1)
XLOC_000292	XLOC_000292	Scaffold_1:442673-443675	C	T	OK	384.913	337.834	-0.188217	-0.852521	Dipeptide transport system permease protein DppB (TC 3.A.1.5.2)
XLOC_000293	XLOC_000293	Scaffold_1:443687-444578	C	T	OK	941.61	892.836	-0.0767341	-0.365544	Dipeptide transport system permease protein DppC (TC 3.A.1.5.2)
XLOC_000294	XLOC_000294	Scaffold_1:447315-447858	C	T	OK	202.34	205.207	0.0202975	0.0726901	Thiol peroxidase%2C Bcp-type (EC 1.11.1.15);Ontology_term
XLOC_000295	XLOC_000295	Scaffold_1:448064-448508	C	T	OK	692.362	779.528	0.171074	0.694378	Peroxide stress regulator PerR%2C FUR family
XLOC_000296	XLOC_000296	Scaffold_1:449123-450008	C	T	OK	301.211	327.296	0.119821	0.488455	CDS_ID OB0907
XLOC_000297	XLOC_000297	Scaffold_1:453362-456382	C	T	OK	778.071	772.572	-0.0102328	-0.0462437	1%2C4-alpha-glucan (glycogen) branching enzyme%2C GH-13-type (EC 2.4.1.18);Ontology_term
XLOC_000298	XLOC_000298	Scaffold_1:456408-461281	C	T	OK	1243.05	1161.04	-0.0984629	-0.435441	Glycogen biosynthesis protein GlgD%2C glucose-1-phosphate adenylyltransferase family
XLOC_000299	XLOC_000299	Scaffold_1:463369-467342	C	T	OK	1011.44	1024.59	0.0186404	0.0825509	Menaquinone-specific isochorismate synthase (EC 5.4.4.2);Ontology_term
XLOC_000300	XLOC_000300	Scaffold_1:467355-468174	C	T	OK	328.003	344.233	0.0696772	0.29634	Naphthoate synthase (EC 4.1.3.36);Ontology_term
XLOC_000301	XLOC_000301	Scaffold_1:468251-469688	C	T	OK	492.42	476.38	-0.0477766	-0.226124	O-succinylbenzoic acid--CoA ligase (EC 6.2.1.26);Ontology_term
XLOC_000302	XLOC_000302	Scaffold_1:469700-470810	C	T	OK	361.713	385.381	0.0914426	0.416134	O-succinylbenzoate synthase (EC 4.2.1.113);Ontology_term
XLOC_000303	XLOC_000303	Scaffold_1:473994-474240	C	T	OK	106.52	83.1976	-0.35651	-0.661321	LSU ribosomal protein L31p @ LSU ribosomal protein L31p%2C zinc-independent
XLOC_000304	XLOC_000304	Scaffold_1:476759-477553	C	T	OK	235.932	249.381	0.0799798	0.285592	Carbonic anhydrase (EC 4.2.1.1);Ontology_term
XLOC_000305	XLOC_000305	Scaffold_1:477690-478164	C	T	OK	239.078	222.002	-0.106906	-0.365604	S-ribosylhomocysteine lyase (EC 4.4.1.21) / Autoinducer-2 production protein LuxS;Ontology_term
XLOC_000306	XLOC_000306	Scaffold_1:478295-478876	C	T	OK	180.336	158.406	-0.187063	-0.627324	FIG01243046: hypothetical protein
XLOC_000307	XLOC_000307	Scaffold_1:479009-479447	C	T	OK	98.8034	115.379	0.223743	0.69663	Non-specific DNA-binding protein Dps / Iron-binding ferritin-like antioxidant protein / Ferroxidase (EC 1.16.3.1);Ontology_term
XLOC_000308	XLOC_000308	Scaffold_1:479596-480001	C	T	OK	120.264	116.789	-0.0422966	-0.128669	FIG01229566: hypothetical protein
XLOC_000309	XLOC_000309	Scaffold_1:480048-480372	C	T	OK	529.542	401.242	-0.400273	-1.34035	FIG01225551: hypothetical protein
XLOC_000310	XLOC_000310	Scaffold_1:480552-481029	C	T	OK	266.515	258.049	-0.0465677	-0.161362	Low G+C gram positive nudix hydrolase YtkD (EC 3.6.-.-);Ontology_term
XLOC_000311	XLOC_000311	Scaffold_1:483749-484574	C	T	OK	406.567	428.966	0.0773713	0.340129	Dipeptidyl aminopeptidases/acylaminoacyl-peptidases
XLOC_000312	XLOC_000312	Scaffold_1:484574-484817	C	T	OK	735.651	782.463	0.0890012	0.291517	FIG00774067: hypothetical protein
XLOC_000313	XLOC_000313	Scaffold_1:488598-489801	C	T	OK	353.465	363.656	0.0410063	0.185777	S-adenosylmethionine synthetase (EC 2.5.1.6);Ontology_term
XLOC_000314	XLOC_000314	Scaffold_1:489945-491844	C	T	OK	268.927	287.36	0.0956419	0.441364	Asparagine synthetase [glutamine-hydrolyzing] (EC 6.3.5.4) AsnB;Ontology_term
XLOC_000315	XLOC_000315	Scaffold_1:494342-495122	C	T	OK	402.759	410.934	0.0289913	0.126856	Lysophospholipase (EC 3.1.1.5)%3B Monoglyceride lipase (EC 3.1.1.23)%3B putative;Ontology_term
XLOC_000316	XLOC_000316	Scaffold_1:495136-496216	C	T	OK	293.786	325.041	0.145855	0.650844	Tetraprenyl-beta-curcumene synthase (EC 4.2.3.130);Ontology_term
XLOC_000317	XLOC_000317	Scaffold_1:499375-499648	C	T	OK	101.418	78.3365	-0.372553	-0.820994	FIG01225931: hypothetical protein
XLOC_000318	XLOC_000318	Scaffold_1:499773-499902	C	T	OK	0	326.286	inf	#NAME?	hypothetical protein
XLOC_000319	XLOC_000319	Scaffold_1:499943-502181	C	T	OK	813.154	825.926	0.0224834	0.0891116	Transcriptional regulator%2C GntR family
XLOC_000320	XLOC_000320	Scaffold_1:502206-504226	C	T	OK	710.84	715.389	0.00920255	0.0403908	Methionine ABC transporter ATP-binding protein
XLOC_000321	XLOC_000321	Scaffold_1:505461-506286	C	T	OK	312.308	320.038	0.035275	0.146642	Methionine ABC transporter substrate-binding protein
XLOC_000322	XLOC_000322	Scaffold_1:506406-507588	C	T	OK	316.517	320.733	0.0190911	0.0861499	Multidrug resistance protein B
XLOC_000323	XLOC_000323	Scaffold_1:507670-507787	C	T	NOTEST	0	0	0	0	hypothetical protein
XLOC_000324	XLOC_000324	Scaffold_1:507856-508138	C	T	OK	1130.71	861.102	-0.392968	-1.38836	unknown
XLOC_000325	XLOC_000325	Scaffold_1:508559-510974	C	T	OK	351.957	361.091	0.0369614	0.177011	Leucyl-tRNA synthetase (EC 6.1.1.4);Ontology_term
XLOC_000326	XLOC_000326	Scaffold_1:511326-511731	C	T	OK	348.005	365.972	0.072627	0.251487	Glyoxylase family protein
XLOC_000327	XLOC_000327	Scaffold_1:512762-514933	C	T	OK	973.785	967.643	-0.00912856	-0.0416471	FIG01243605: hypothetical protein
XLOC_000328	XLOC_000328	Scaffold_1:514951-515716	C	T	OK	264.942	322.868	0.285269	1.19786	UDP-glucose 4-epimerase (EC 5.1.3.2);Ontology_term
XLOC_000329	XLOC_000329	Scaffold_1:515857-516736	C	T	OK	604.821	512.809	-0.238086	-1.08698	Probable ABC transporter permease protein ytcP
XLOC_000330	XLOC_000330	Scaffold_1:516752-518258	C	T	OK	422.305	420.498	-0.00618497	-0.0289934	lipoprotein
XLOC_000331	XLOC_000331	Scaffold_1:520814-521780	C	T	OK	278.13	288.496	0.0527943	0.228639	ABC-type polysaccharide transport system%2C permease component
XLOC_000332	XLOC_000332	Scaffold_1:521808-523415	C	T	OK	708.807	693.329	-0.0318513	-0.12726	Rhamnogalacturonides degradation protein RhiN
XLOC_000333	XLOC_000333	Scaffold_1:523436-524714	C	T	OK	534.036	501.739	-0.0899983	-0.422146	Myo-inositol 2-dehydrogenase 1 (EC 1.1.1.18);Ontology_term
XLOC_000334	XLOC_000334	Scaffold_1:524727-525375	C	T	OK	415.004	365.432	-0.183523	-0.751649	YTEU
XLOC_000335	XLOC_000335	Scaffold_1:525412-525772	C	T	OK	268.888	284.356	0.0806964	0.262286	hypothetical protein
XLOC_000336	XLOC_000336	Scaffold_1:525876-527126	C	T	OK	1126.6	1201.86	0.0932895	0.0226523	response regulator aspartate phosphatase
XLOC_000337	XLOC_000337	Scaffold_1:527208-527523	C	T	OK	116.029	130.874	0.173685	0.502108	Rhodanese-like domain protein
XLOC_000338	XLOC_000338	Scaffold_1:527688-527871	C	T	OK	63.536	92.3377	0.539346	0.558927	Protein cse60
XLOC_000339	XLOC_000339	Scaffold_1:531180-532809	C	T	OK	410.529	400.753	-0.034772	-0.163192	Membrane protein involved in the export of O-antigen%2C teichoic acid lipoteichoic acids
XLOC_000340	XLOC_000340	Scaffold_1:532849-533572	C	T	OK	247.271	275.824	0.157656	0.610149	Ribosomal small subunit pseudouridine synthase A (EC 4.2.1.70);Ontology_term
XLOC_000341	XLOC_000341	Scaffold_1:534187-536052	C	T	OK	996.015	1030.22	0.0487107	0.220538	ABC transporter%2C ATP-binding protein
XLOC_000342	XLOC_000342	Scaffold_1:537487-538879	C	T	OK	466.174	456.983	-0.0287268	-0.135947	Acetylornithine deacetylase/Succinyl-diaminopimelate desuccinylase and related deacylases
XLOC_000343	XLOC_000343	Scaffold_1:538895-539369	C	T	OK	122.349	124.917	0.0299682	0.0968515	hypothetical protein
XLOC_000344	XLOC_000344	Scaffold_1:539442-539709	C	T	OK	626.994	512.87	-0.289858	-0.957843	hypothetical protein
XLOC_000345	XLOC_000345	Scaffold_1:540872-542403	C	T	OK	565.286	576.465	0.0282499	0.118816	2'-5' RNA ligase
XLOC_000346	XLOC_000346	Scaffold_1:542455-543376	C	T	OK	426.95	422.922	-0.0136765	-0.061122	Transcription regulator [contains diacylglycerol kinase catalytic domain]
XLOC_000347	XLOC_000347	Scaffold_1:543402-545535	C	T	OK	316.877	309.636	-0.0333515	-0.158091	Glycogen debranching enzyme (EC 3.2.1.-) / Pullulanase (EC 3.2.1.41);Ontology_term
XLOC_000348	XLOC_000348	Scaffold_1:545711-546800	C	T	OK	685.44	678.598	-0.0144743	-0.0658951	aminoglycoside phosphotransferase family protein
XLOC_000349	XLOC_000349	Scaffold_1:546985-547621	C	T	OK	98.7882	101.956	0.0455333	0.150643	tRNA (guanine46-N7-)-methyltransferase (EC 2.1.1.33);Ontology_term
XLOC_000350	XLOC_000350	Scaffold_1:547712-548558	C	T	OK	392.615	392.909	0.00107788	0.00468328	metallo-beta-lactamase family protein
XLOC_000351	XLOC_000351	Scaffold_1:548631-550329	C	T	OK	434.09	421.425	-0.042719	-0.20324	NAD-dependent malic enzyme (EC 1.1.1.38);Ontology_term
XLOC_000352	XLOC_000352	Scaffold_1:550815-551889	C	T	OK	523.162	561.332	0.101598	0.474752	Glutamyl aminopeptidase (EC 3.4.11.7)%3B Deblocking aminopeptidase;Ontology_term
XLOC_000353	XLOC_000353	Scaffold_1:552678-552999	C	T	OK	424.551	387.16	-0.133007	-0.443272	FIG009688: Thioredoxin
XLOC_000354	XLOC_000354	Scaffold_1:553018-553828	C	T	OK	591.881	552.313	-0.0998224	-0.457832	FIG002434: Uncharacterized protein YtpQ
XLOC_000355	XLOC_000355	Scaffold_1:553846-554452	C	T	OK	271.215	238.883	-0.183135	-0.671526	Phenylalanyl-tRNA synthetase domain protein (Bsu YtpR)
XLOC_000356	XLOC_000356	Scaffold_1:554636-557540	C	T	OK	493.716	466.384	-0.0821627	-0.39923	Cell division protein FtsK
XLOC_000357	XLOC_000357	Scaffold_1:557805-559104	C	T	OK	443.019	381.696	-0.214947	-0.994861	UDP-N-acetylmuramate--alanine ligase (EC 6.3.2.8);Ontology_term
XLOC_000358	XLOC_000358	Scaffold_1:559271-559694	C	T	OK	527.034	384.668	-0.454283	-1.61096	Pyridoxamine 5'-phosphate oxidase (EC 1.4.3.5);Ontology_term
XLOC_000359	XLOC_000359	Scaffold_1:559697-560567	C	T	OK	909.621	891.802	-0.0285419	-0.107731	Pyridoxamine 5'-phosphate oxidase (EC 1.4.3.5);Ontology_term
XLOC_000360	XLOC_000360	Scaffold_1:560610-561126	C	T	OK	405.249	355.595	-0.188571	-0.679235	hypothetical protein
XLOC_000361	XLOC_000361	Scaffold_1:561126-561246	C	T	OK	603.971	0	#NAME?	#NAME?	hypothetical protein
XLOC_000362	XLOC_000362	Scaffold_1:561396-562473	C	T	OK	266.082	256.847	-0.0509595	-0.216866	Chorismate mutase I (EC 5.4.99.5) / 2-keto-3-deoxy-D-arabino-heptulosonate-7-phosphate synthase I beta (EC 2.5.1.54);Ontology_term
XLOC_000363	XLOC_000363	Scaffold_1:562788-563790	C	T	OK	542.583	482.217	-0.170159	-0.782301	Catabolite control protein A
XLOC_000364	XLOC_000364	Scaffold_1:563843-565386	C	T	OK	723.211	802.627	0.150313	0.685679	Flagellar motor rotation protein MotA
XLOC_000365	XLOC_000365	Scaffold_1:568060-569779	C	T	OK	612.336	561.087	-0.1261	-0.605872	Acetyl-coenzyme A synthetase (EC 6.2.1.1);Ontology_term
XLOC_000366	XLOC_000366	Scaffold_1:570118-571387	C	T	OK	314.657	308.33	-0.0293054	-0.130647	Tyrosyl-tRNA synthetase (EC 6.1.1.1);Ontology_term
XLOC_000367	XLOC_000367	Scaffold_1:571518-571665	C	T	OK	197.064	147.252	-0.420372	-0.291057	hypothetical protein
XLOC_000368	XLOC_000368	Scaffold_1:574372-576073	C	T	OK	207.993	219.781	0.0795311	0.354043	GGDEF family protein
XLOC_000369	XLOC_000369	Scaffold_1:576710-578154	C	T	OK	243.197	217.959	-0.15807	-0.369206	Transcriptional regulator%2C TetR family
XLOC_000370	XLOC_000370	Scaffold_1:578340-580035	C	T	OK	323.851	324.882	0.00458884	0.0212862	Septation ring formation regulator EzrA
XLOC_000371	XLOC_000371	Scaffold_1:581674-582820	C	T	OK	310.312	317.406	0.0326131	0.143201	Cysteine desulfurase (EC 2.8.1.7);Ontology_term
XLOC_000372	XLOC_000372	Scaffold_1:582827-584033	C	T	OK	288.537	295.006	0.0319874	0.143854	tRNA S(4)U 4-thiouridine synthase (former ThiI)
XLOC_000373	XLOC_000373	Scaffold_1:584144-584357	C	T	OK	26.3043	25.936	-0.0203414	-0.0163166	Small acid-soluble spore protein%2C alpha/beta family%2C SASP_1
XLOC_000374	XLOC_000374	Scaffold_1:584499-586089	C	T	OK	506.54	483.967	-0.065769	-0.312331	Acyl-coenzyme A synthetases/AMP-(fatty) acid ligases%2C YtcI homolog
XLOC_000375	XLOC_000375	Scaffold_1:586114-586543	C	T	OK	246.241	269.114	0.128144	0.43013	YxaD
XLOC_000376	XLOC_000376	Scaffold_1:587806-588814	C	T	OK	308.557	326.606	0.0820109	0.350531	Protease IV (EC 3.4.21.-);Ontology_term
XLOC_000377	XLOC_000377	Scaffold_1:588829-589348	C	T	OK	292.574	291.613	-0.00474769	-0.0171883	BH3197 unknown conserved protein
XLOC_000378	XLOC_000378	Scaffold_1:589468-590152	C	T	OK	245.789	220.69	-0.155399	-0.58828	putative secreted protein
XLOC_000379	XLOC_000379	Scaffold_1:590164-590623	C	T	OK	468.517	403.686	-0.214868	-0.820239	Sporulation protein%2C YTFJ Bacillus subtilis ortholog
XLOC_000380	XLOC_000380	Scaffold_1:590757-591264	C	T	OK	519.599	512.836	-0.0189005	-0.0746661	Thiol peroxidase%2C Tpx-type (EC 1.11.1.15);Ontology_term
XLOC_000381	XLOC_000381	Scaffold_1:591349-592336	C	T	OK	333.719	329.697	-0.0174971	-0.0763119	Adenine-specific methyltransferase (EC 2.1.1.72);Ontology_term
XLOC_000382	XLOC_000382	Scaffold_1:592565-594370	C	T	OK	277.848	262.645	-0.081182	-0.356681	Acetate kinase (EC 2.7.2.1);Ontology_term
XLOC_000383	XLOC_000383	Scaffold_1:594564-597152	C	T	OK	385.316	392.408	0.0263121	0.120447	Argininosuccinate synthase (EC 6.3.4.5);Ontology_term
XLOC_000384	XLOC_000384	Scaffold_1:597226-597370	C	T	OK	90.2551	0	#NAME?	#NAME?	hypothetical protein
XLOC_000385	XLOC_000385	Scaffold_1:597535-598297	C	T	OK	359.528	399.383	0.151668	0.64125	3-oxoacyl-[acyl-carrier protein] reductase (EC 1.1.1.100);Ontology_term
XLOC_000386	XLOC_000386	Scaffold_1:598329-599016	C	T	OK	425.628	412.662	-0.0446314	-0.192633	FIG002379: metal-dependent hydrolase
XLOC_000387	XLOC_000387	Scaffold_1:599133-599691	C	T	OK	211.781	210.801	-0.0066917	-0.0239209	Negative regulator of phenolic acid metabolism PadR
XLOC_000388	XLOC_000388	Scaffold_1:599768-601106	C	T	OK	322.766	324.335	0.00699634	0.0319189	FIG009439: Cytosolic protein containing multiple CBS domains
XLOC_000389	XLOC_000389	Scaffold_1:601550-602528	C	T	OK	405.444	391.003	-0.0523242	-0.234229	FIG146085: 3'-to-5' oligoribonuclease A%2C Bacillus type
XLOC_000390	XLOC_000390	Scaffold_1:603874-607258	C	T	OK	317.046	321.689	0.0209779	0.101224	DNA polymerase III alpha subunit (EC 2.7.7.7);Ontology_term
XLOC_000391	XLOC_000391	Scaffold_1:607400-608636	C	T	OK	271.089	239.734	-0.177334	-0.777976	NADP-dependent malic enzyme (EC 1.1.1.40);Ontology_term
XLOC_000392	XLOC_000392	Scaffold_1:608998-610836	C	T	OK	458.339	469.578	0.0349491	0.15291	Acetyl-coenzyme A carboxyl transferase beta chain (EC 6.4.1.2);Ontology_term
XLOC_000393	XLOC_000393	Scaffold_1:611078-612038	C	T	OK	305.719	352.059	0.203613	0.906174	6-phosphofructokinase (EC 2.7.1.11);Ontology_term
XLOC_000394	XLOC_000394	Scaffold_1:612062-613820	C	T	OK	315.856	302.69	-0.0614267	-0.284511	Pyruvate kinase (EC 2.7.1.40);Ontology_term
XLOC_000395	XLOC_000395	Scaffold_1:613914-614301	C	T	OK	396.823	354.2	-0.163932	-0.563846	FxsA protein
XLOC_000396	XLOC_000396	Scaffold_1:615560-616025	C	T	OK	211.007	215.147	0.0280357	0.0950376	putative membrane protein
XLOC_000397	XLOC_000397	Scaffold_1:616284-616404	C	T	OK	3534.6	739.472	-2.25698	-1.14591	hypothetical protein
XLOC_000398	XLOC_000398	Scaffold_1:616414-616552	C	T	OK	88.0982	0	#NAME?	#NAME?	hypothetical protein
XLOC_000399	XLOC_000399	Scaffold_1:618052-619171	C	T	OK	245.579	224.677	-0.128335	-0.533903	Citrate synthase (si) (EC 2.3.3.1);Ontology_term
XLOC_000400	XLOC_000400	Scaffold_1:619292-620609	C	T	OK	656.223	593.495	-0.144951	-0.686801	Isocitrate dehydrogenase [NADP] (EC 1.1.1.42);Ontology_term
XLOC_000401	XLOC_000401	Scaffold_1:620656-621754	C	T	OK	345.161	344.788	-0.00156026	-0.00698862	Malate dehydrogenase (EC 1.1.1.37);Ontology_term
XLOC_000402	XLOC_000402	Scaffold_1:621924-624385	C	T	OK	687.478	695.643	0.0170337	0.0702873	Alkaline phosphatase synthesis transcriptional regulatory protein PhoP
XLOC_000403	XLOC_000403	Scaffold_1:624640-627280	C	T	OK	274.896	270.224	-0.0247292	-0.11735	DNA polymerase I (EC 2.7.7.7);Ontology_term
XLOC_000404	XLOC_000404	Scaffold_1:627298-628126	C	T	OK	278.45	258.444	-0.107566	-0.447024	Formamidopyrimidine-DNA glycosylase (EC 3.2.2.23);Ontology_term
XLOC_000405	XLOC_000405	Scaffold_1:628346-628979	C	T	OK	476.397	509.447	0.0967665	0.397699	membrane protein%2C putative
XLOC_000406	XLOC_000406	Scaffold_1:628996-629602	C	T	OK	355.429	389.198	0.130943	0.517575	Dephospho-CoA kinase (EC 2.7.1.24);Ontology_term
XLOC_000407	XLOC_000407	Scaffold_1:631365-632388	C	T	OK	371.317	384.599	0.0507028	0.223879	NADPH-dependent glyceraldehyde-3-phosphate dehydrogenase (EC 1.2.1.13);Ontology_term
XLOC_000408	XLOC_000408	Scaffold_1:632623-633010	C	T	OK	302.304	347.03	0.199057	0.693892	S-adenosylmethionine decarboxylase proenzyme (EC 4.1.1.50)%2C prokaryotic class 1B;Ontology_term
XLOC_000409	XLOC_000409	Scaffold_1:633195-633588	C	T	OK	194.801	242.575	0.316431	1.03822	FIG01239047: hypothetical protein
XLOC_000410	XLOC_000410	Scaffold_1:633643-634063	C	T	OK	64.9553	79.9429	0.299523	0.84811	Ribonucleotide reductase transcriptional regulator NrdR
XLOC_000411	XLOC_000411	Scaffold_1:634179-635604	C	T	OK	373.336	385.051	0.0445748	0.207466	Helicase loader DnaB
XLOC_000412	XLOC_000412	Scaffold_1:635619-636552	C	T	OK	436.862	399.926	-0.127444	-0.575741	Helicase loader DnaI
XLOC_000413	XLOC_000413	Scaffold_1:636590-637223	C	T	OK	496.389	459.183	-0.112402	-0.467054	CONSERVED MEMBRANE PROTEIN
XLOC_000414	XLOC_000414	Scaffold_1:637300-638143	C	T	OK	562.974	475.697	-0.243025	-1.09968	FIG01227197: hypothetical protein
XLOC_000415	XLOC_000415	Scaffold_1:638323-638482	C	T	OK	44.1646	0	#NAME?	#NAME?	hypothetical protein
XLOC_000416	XLOC_000416	Scaffold_1:638487-640419	C	T	OK	348.315	353.85	0.0227448	0.107428	Threonyl-tRNA synthetase (EC 6.1.1.3);Ontology_term
XLOC_000417	XLOC_000417	Scaffold_1:641567-641750	C	T	OK	240.955	268.308	0.155126	0.310058	FIG01245696: hypothetical protein
XLOC_000418	XLOC_000418	Scaffold_1:641962-642076	C	T	NOTEST	0	0	0	0	hypothetical protein
XLOC_000419	XLOC_000419	Scaffold_1:642135-644617	C	T	OK	723.613	677.457	-0.0950901	-0.378724	Autolysis histidine kinase LytS
XLOC_000420	XLOC_000420	Scaffold_1:646458-646872	C	T	OK	504.705	419.981	-0.265118	-0.951329	Antiholin-like protein LrgA
XLOC_000421	XLOC_000421	Scaffold_1:646895-647579	C	T	OK	415.516	406.289	-0.0323983	-0.131877	LrgA-associated membrane protein LrgB
XLOC_000422	XLOC_000422	Scaffold_1:647968-648433	C	T	OK	293.294	282.84	-0.0523595	-0.184195	Translation initiation factor 3
XLOC_000423	XLOC_000423	Scaffold_1:648450-648651	C	T	OK	101.957	66.7912	-0.61023	-0.807495	LSU ribosomal protein L35p
XLOC_000424	XLOC_000424	Scaffold_1:648683-649043	C	T	OK	34.4627	38.4936	0.15958	0.345699	LSU ribosomal protein L20p
XLOC_000425	XLOC_000425	Scaffold_1:649167-649431	C	T	OK	279.718	253.289	-0.143189	-0.402571	FIG01226888: hypothetical protein
XLOC_000426	XLOC_000426	Scaffold_1:650021-651107	C	T	OK	389.827	405.712	0.0576222	0.264513	Peptidase%2C M42 family
XLOC_000427	XLOC_000427	Scaffold_1:651259-652222	C	T	OK	582.149	529.184	-0.137619	-0.641284	Arabinan endo-1%2C5-alpha-L-arabinosidase (EC 3.2.1.99);Ontology_term
XLOC_000428	XLOC_000428	Scaffold_1:652482-653964	C	T	OK	443.53	474.484	0.0973264	0.461944	L-arabinose isomerase (EC 5.3.1.4);Ontology_term
XLOC_000429	XLOC_000429	Scaffold_1:654011-655670	C	T	OK	326.292	342.324	0.0691996	0.322904	Ribulokinase (EC 2.7.1.16);Ontology_term
XLOC_000430	XLOC_000430	Scaffold_1:655685-656372	C	T	OK	623.384	613.41	-0.0232693	-0.107065	L-ribulose-5-phosphate 4-epimerase (EC 5.1.3.4);Ontology_term
XLOC_000431	XLOC_000431	Scaffold_1:656388-658895	C	T	OK	624.672	664.235	0.0885966	0.414222	Glycerol-1-phosphate dehydrogenase [NAD(P)] (EC 1.1.1.261);Ontology_term
XLOC_000432	XLOC_000432	Scaffold_1:658925-660712	C	T	OK	780.065	785.714	0.0104117	0.0483166	Alpha-arabinosides ABC transport system%2C permease protein 1
XLOC_000433	XLOC_000433	Scaffold_1:660747-662256	C	T	OK	278.67	286.781	0.0413909	0.190302	Alpha-N-arabinofuranosidase (EC 3.2.1.55);Ontology_term
XLOC_000434	XLOC_000434	Scaffold_1:662348-662627	C	T	OK	871.297	991.343	0.18622	0.639056	FIG01235209: hypothetical protein
XLOC_000435	XLOC_000435	Scaffold_1:665471-667268	C	T	OK	249.53	279.252	0.162353	0.756662	Carbon starvation protein A
XLOC_000436	XLOC_000436	Scaffold_1:667628-668375	C	T	OK	273.141	274.457	0.00693514	0.0278019	FIG011178: rRNA methylase
XLOC_000437	XLOC_000437	Scaffold_1:668560-668677	C	T	NOTEST	0	0	0	0	hypothetical protein
XLOC_000438	XLOC_000438	Scaffold_1:668737-669772	C	T	OK	355.248	373.761	0.073291	0.330612	Phenylalanyl-tRNA synthetase alpha chain (EC 6.1.1.20);Ontology_term
XLOC_000439	XLOC_000439	Scaffold_1:669787-672202	C	T	OK	300.604	340.695	0.180617	0.859694	Phenylalanyl-tRNA synthetase beta chain (EC 6.1.1.20);Ontology_term
XLOC_000440	XLOC_000440	Scaffold_1:675441-675699	C	T	OK	128.932	173.414	0.427604	0.994725	Z-ring-associated protein
XLOC_000441	XLOC_000441	Scaffold_1:675707-676244	C	T	OK	222.525	207.96	-0.097658	-0.337031	Possible colicin V production protein
XLOC_000442	XLOC_000442	Scaffold_1:676387-678103	C	T	OK	346.221	341.761	-0.0187064	-0.0876776	DNA polymerase X family
XLOC_000443	XLOC_000443	Scaffold_1:678119-680477	C	T	OK	469.18	491.794	0.0679119	0.326961	Recombination inhibitory protein MutS2
XLOC_000444	XLOC_000444	Scaffold_1:680522-680900	C	T	OK	131.716	131.624	-0.00100442	-0.00310725	DUF350 domain-containing protein
XLOC_000445	XLOC_000445	Scaffold_1:681108-682788	C	T	OK	420.464	454.575	0.112536	0.537163	Long-chain-fatty-acid--CoA ligase (EC 6.2.1.3);Ontology_term
XLOC_000446	XLOC_000446	Scaffold_1:682953-683532	C	T	OK	242.968	244.067	0.0065099	0.023576	Fatty acid degradation regulator YsiA%2C TetR family
XLOC_000447	XLOC_000447	Scaffold_1:683533-684310	C	T	OK	190.49	200.195	0.0716911	0.276023	Enoyl-CoA hydratase (EC 4.2.1.17);Ontology_term
XLOC_000448	XLOC_000448	Scaffold_1:684341-685115	C	T	OK	272.132	285.008	0.0666949	0.276738	Electron transfer flavoprotein%2C beta subunit
XLOC_000449	XLOC_000449	Scaffold_1:685164-686142	C	T	OK	400.978	421.138	0.0707724	0.321476	Electron transfer flavoprotein%2C alpha subunit
XLOC_000450	XLOC_000450	Scaffold_1:686354-686669	C	T	OK	251.555	291.19	0.211084	0.652938	Thioredoxin
XLOC_000451	XLOC_000451	Scaffold_1:686778-688587	C	T	OK	356.645	389.233	0.126143	0.594726	Excinuclease ABC subunit C
XLOC_000452	XLOC_000452	Scaffold_1:688829-690209	C	T	OK	382.948	368.238	-0.0565101	-0.261639	Aspartokinase (EC 2.7.2.4);Ontology_term
XLOC_000453	XLOC_000453	Scaffold_1:690999-691608	C	T	OK	530.431	577.195	0.121891	0.505878	Succinate dehydrogenase cytochrome b558 subunit
XLOC_000454	XLOC_000454	Scaffold_1:691641-694166	C	T	OK	815.312	783.502	-0.0574152	-0.230134	Succinate dehydrogenase flavoprotein subunit (EC 1.3.99.1);Ontology_term
XLOC_000455	XLOC_000455	Scaffold_1:694229-694700	C	T	OK	408.603	453.8	0.151359	0.570731	4-hydroxybenzoyl-CoA thioesterase family active site
XLOC_000456	XLOC_000456	Scaffold_1:694717-695529	C	T	OK	231.449	190.433	-0.281409	-1.04432	short-chain dehydrogenase
XLOC_000457	XLOC_000457	Scaffold_1:695591-695816	C	T	OK	168.755	290.703	0.784616	1.79999	Major transcriptional regulator of spore coat formation GerE
XLOC_000458	XLOC_000458	Scaffold_1:695977-696421	C	T	OK	179.037	187.571	0.0671827	0.223364	Transcriptional regulator%2C MarR family
XLOC_000459	XLOC_000459	Scaffold_1:696428-697247	C	T	OK	232.635	220.721	-0.0758441	-0.302079	Glutamate racemase (EC 5.1.1.3);Ontology_term
XLOC_000460	XLOC_000460	Scaffold_1:697399-698509	C	T	OK	402.917	406.239	0.0118466	0.0537391	Germination (Cortex hydrolysis) and sporulation protein GerM
XLOC_000461	XLOC_000461	Scaffold_1:698519-699375	C	T	OK	349.49	518.715	0.569692	0.219058	hypothetical protein
XLOC_000462	XLOC_000462	Scaffold_1:699397-699988	C	T	OK	421.233	382.168	-0.140409	-0.570038	Nucleoside 5-triphosphatase RdgB (dHAPTP%2C dITP%2C XTP-specific) (EC 3.6.1.15);Ontology_term
XLOC_000463	XLOC_000463	Scaffold_1:700004-700526	C	T	OK	281.955	315.864	0.163841	0.598707	FIG009886: phosphoesterase
XLOC_000464	XLOC_000464	Scaffold_1:701088-701580	C	T	OK	962.755	827.937	-0.217648	-0.917191	hypothetical protein
XLOC_000465	XLOC_000465	Scaffold_1:701911-702118	C	T	OK	526.087	340.196	-0.628938	-1.57427	hypothetical protein
XLOC_000466	XLOC_000466	Scaffold_1:702277-703660	C	T	OK	285.258	333.701	0.226289	1.04558	NADP-specific glutamate dehydrogenase (EC 1.4.1.4);Ontology_term
XLOC_000467	XLOC_000467	Scaffold_1:704303-705302	C	T	OK	516.227	462.659	-0.158057	-0.730116	Branched-chain amino acid aminotransferase (EC 2.6.1.42);Ontology_term
XLOC_000468	XLOC_000468	Scaffold_1:705725-707965	C	T	OK	983.098	913.563	-0.10583	-0.356564	Acetolactate synthase large subunit (EC 2.2.1.6);Ontology_term
XLOC_000469	XLOC_000469	Scaffold_1:707988-710560	C	T	OK	800.902	779.391	-0.039278	-0.183115	Ketol-acid reductoisomerase (EC 1.1.1.86);Ontology_term
XLOC_000470	XLOC_000470	Scaffold_1:710587-711700	C	T	OK	608.017	644.925	0.0850207	0.399556	3-isopropylmalate dehydrogenase (EC 1.1.1.85);Ontology_term
XLOC_000471	XLOC_000471	Scaffold_1:711733-713152	C	T	OK	388.942	376.459	-0.0470624	-0.219116	3-isopropylmalate dehydratase large subunit (EC 4.2.1.33);Ontology_term
XLOC_000472	XLOC_000472	Scaffold_1:713164-713764	C	T	OK	297.861	296.181	-0.00815978	-0.030676	3-isopropylmalate dehydratase small subunit (EC 4.2.1.33);Ontology_term
XLOC_000473	XLOC_000473	Scaffold_1:713893-714901	C	T	OK	340.84	336.393	-0.0189465	-0.0837546	TPR repeat protein
XLOC_000474	XLOC_000474	Scaffold_1:715127-716402	C	T	OK	213.842	214.228	0.00260658	0.0108733	Cell division trigger factor (EC 5.2.1.8);Ontology_term
XLOC_000475	XLOC_000475	Scaffold_1:716556-717936	C	T	OK	191.581	206.414	0.10759	0.442169	ATP-dependent Clp protease ATP-binding subunit ClpX
XLOC_000476	XLOC_000476	Scaffold_1:718117-722898	C	T	OK	292.637	306.617	0.067326	0.249048	ATP-dependent protease La (EC 3.4.21.53) LonB Type I;Ontology_term
XLOC_000477	XLOC_000477	Scaffold_1:722946-723548	C	T	OK	87.3681	0	#NAME?	#NAME?	hypothetical protein
XLOC_000478	XLOC_000478	Scaffold_1:723620-724982	C	T	OK	199.371	213.174	0.0965784	0.413216	Glutamyl-tRNA reductase (EC 1.2.1.70);Ontology_term
XLOC_000479	XLOC_000479	Scaffold_1:724987-725818	C	T	OK	143.633	157.009	0.128469	0.473884	HemX protein%2C negative effector of steady-state concentration of glutamyl-tRNA reductase
XLOC_000480	XLOC_000480	Scaffold_1:725857-727580	C	T	OK	356.16	417.865	0.230511	1.01001	Porphobilinogen deaminase (EC 2.5.1.61);Ontology_term
XLOC_000481	XLOC_000481	Scaffold_1:727583-728558	C	T	OK	209.83	225.355	0.10298	0.414945	Porphobilinogen synthase (EC 4.2.1.24);Ontology_term
XLOC_000482	XLOC_000482	Scaffold_1:728583-729879	C	T	OK	352.445	381.682	0.114975	0.533466	Glutamate-1-semialdehyde aminotransferase (EC 5.4.3.8);Ontology_term
XLOC_000483	XLOC_000483	Scaffold_1:730027-731617	C	T	OK	456.695	469.382	0.0395318	0.18706	Stage VI sporulation protein D
XLOC_000484	XLOC_000484	Scaffold_1:731644-732667	C	T	OK	564.72	572.22	0.0190345	0.0888138	CotS-related protein
XLOC_000485	XLOC_000485	Scaffold_1:733336-735979	C	T	OK	278.62	279.466	0.0043775	0.0207682	Valyl-tRNA synthetase (EC 6.1.1.9);Ontology_term
XLOC_000486	XLOC_000486	Scaffold_1:736060-737359	C	T	OK	272.482	265.818	-0.0357212	-0.159325	Dihydrofolate synthase (EC 6.3.2.12) / Folylpolyglutamate synthase (EC 6.3.2.17);Ontology_term
XLOC_000487	XLOC_000487	Scaffold_1:737511-738261	C	T	OK	780.607	738.659	-0.0796878	-0.372919	Late competence protein ComC%2C processing protease%3B Leader peptidase (Prepilin peptidase) (EC 3.4.23.43) / N-methyltransferase (EC 2.1.1.-);Ontology_term
XLOC_000488	XLOC_000488	Scaffold_1:738466-739501	C	T	OK	306.239	353.956	0.208911	0.924108	Stage II sporulation protein B
XLOC_000489	XLOC_000489	Scaffold_1:739651-740224	C	T	OK	134.811	129.078	-0.0626869	-0.209344	Septum formation protein Maf
XLOC_000490	XLOC_000490	Scaffold_1:740278-740953	C	T	OK	347.103	349.972	0.0118767	0.0473909	DNA repair protein RadC
XLOC_000491	XLOC_000491	Scaffold_1:741040-742051	C	T	OK	519.902	502.288	-0.0497228	-0.228268	Rod shape-determining protein MreB
XLOC_000492	XLOC_000492	Scaffold_1:742081-743505	C	T	OK	641.368	531.125	-0.272101	-1.04098	Rod shape-determining protein MreC
XLOC_000493	XLOC_000493	Scaffold_1:743516-744239	C	T	OK	419.404	399.931	-0.0685883	-0.28457	Septum site-determining protein MinC
XLOC_000494	XLOC_000494	Scaffold_1:744241-745048	C	T	OK	327.903	323.909	-0.0176825	-0.0743042	Septum site-determining protein MinD
XLOC_000495	XLOC_000495	Scaffold_1:745991-747642	C	T	OK	883.167	876.662	-0.0106656	-0.0494015	Stage IV sporulation protein FA (SpoIVFA)
XLOC_000496	XLOC_000496	Scaffold_1:747802-748111	C	T	OK	176.048	135.635	-0.376242	-1.0651	LSU ribosomal protein L21p
XLOC_000497	XLOC_000497	Scaffold_1:748123-748465	C	T	OK	41.5957	62.0916	0.577964	1.40428	FIG139598: Potential ribosomal protein
XLOC_000498	XLOC_000498	Scaffold_1:748477-748759	C	T	OK	159.337	164.244	0.0437641	0.115871	LSU ribosomal protein L27p
XLOC_000499	XLOC_000499	Scaffold_1:748985-749564	C	T	OK	293.451	289.42	-0.0199544	-0.0727998	Sporulation initiation phosphotransferase B (Spo0B)
XLOC_000500	XLOC_000500	Scaffold_1:749596-750883	C	T	OK	294.929	295.031	0.00049888	0.00227551	GTP-binding protein Obg
XLOC_000501	XLOC_000501	Scaffold_1:751000-751444	C	T	OK	184.812	181.676	-0.0246951	-0.0832876	Chorismate mutase (EC 5.4.99.5);Ontology_term
XLOC_000502	XLOC_000502	Scaffold_1:751588-752323	C	T	OK	265.738	247.366	-0.103356	-0.394222	Prephenate dehydratase (EC 4.2.1.51);Ontology_term
XLOC_000503	XLOC_000503	Scaffold_1:754154-755729	C	T	OK	372.754	367.684	-0.019758	-0.0931481	L-aspartate oxidase (EC 1.4.3.16);Ontology_term
XLOC_000504	XLOC_000504	Scaffold_1:755733-756549	C	T	OK	514.367	477.313	-0.107864	-0.488313	Quinolinate phosphoribosyltransferase [decarboxylating] (EC 2.4.2.19);Ontology_term
XLOC_000505	XLOC_000505	Scaffold_1:756570-757680	C	T	OK	395.333	366.509	-0.109217	-0.503144	Quinolinate synthetase (EC 2.5.1.72);Ontology_term
XLOC_000506	XLOC_000506	Scaffold_1:757795-758848	C	T	OK	405.295	407.789	0.00885161	0.0406857	Gamma-aminobutyrate:alpha-ketoglutarate aminotransferase (EC 2.6.1.19);Ontology_term
XLOC_000507	XLOC_000507	Scaffold_1:759020-759656	C	T	OK	355.457	383.237	0.108565	0.432186	Sporulation cortex protein coxA
XLOC_000508	XLOC_000508	Scaffold_1:759780-760503	C	T	OK	415.498	412.48	-0.0105149	-0.0439398	FIG000859: hypothetical protein YebC
XLOC_000509	XLOC_000509	Scaffold_1:760641-760968	C	T	OK	362.828	323.578	-0.165173	-0.539791	FIG01251821: hypothetical protein
XLOC_000510	XLOC_000510	Scaffold_1:761631-762342	C	T	OK	230.131	221.403	-0.0557802	-0.216604	phage-related protein YmaC
XLOC_000511	XLOC_000511	Scaffold_1:762401-762866	C	T	OK	268.599	213.634	-0.330309	-1.13378	FIG01245428: hypothetical protein
XLOC_000512	XLOC_000512	Scaffold_1:762974-763154	C	T	OK	302.259	182.728	-0.726088	-1.16579	acid-soluble spore protein H
XLOC_000513	XLOC_000513	Scaffold_1:764268-764829	C	T	OK	389.94	350.272	-0.154775	-0.601911	bypass-of-forespore protein C%2C putative
XLOC_000514	XLOC_000514	Scaffold_1:764952-765558	C	T	OK	294.227	312.41	0.0865086	0.33144	Holliday junction DNA helicase RuvA
XLOC_000515	XLOC_000515	Scaffold_1:765567-766765	C	T	OK	545.721	553.12	0.0194307	0.0381496	Holliday junction DNA helicase RuvB
XLOC_000516	XLOC_000516	Scaffold_1:766805-767834	C	T	OK	204.452	203.125	-0.00939113	-0.0387685	S-adenosylmethionine:tRNA ribosyltransferase-isomerase (EC 5.-.-.-);Ontology_term
XLOC_000517	XLOC_000517	Scaffold_1:767862-769008	C	T	OK	318.777	300.26	-0.0863331	-0.389298	tRNA-guanine transglycosylase (EC 2.4.2.29);Ontology_term
XLOC_000518	XLOC_000518	Scaffold_1:769057-769318	C	T	OK	162.253	137.521	-0.23859	-0.559846	Preprotein translocase subunit YajC (TC 3.A.5.1.1)
XLOC_000519	XLOC_000519	Scaffold_1:770032-770683	C	T	OK	188.267	216.108	0.198974	0.722401	Ortholog yrbG%2C yetE%2C ykjA%2C ydfS%2C ydfR B.subtilis
XLOC_000520	XLOC_000520	Scaffold_1:772363-772660	C	T	OK	177.754	158.423	-0.166097	-0.477694	FIG01227478: hypothetical protein
XLOC_000521	XLOC_000521	Scaffold_1:772696-774922	C	T	OK	382.647	366.294	-0.0630112	-0.299571	Protein-export membrane protein SecD (TC 3.A.5.1.1) / Protein-export membrane protein SecF (TC 3.A.5.1.1)
XLOC_000522	XLOC_000522	Scaffold_1:775074-775578	C	T	OK	298.844	315.972	0.0804024	0.292216	trkA domain protein
XLOC_000523	XLOC_000523	Scaffold_1:775601-775898	C	T	OK	951.081	926.265	-0.0381446	-0.133379	unknown
XLOC_000524	XLOC_000524	Scaffold_1:775969-778318	C	T	OK	266.451	253.554	-0.0715783	-0.338333	Single-stranded-DNA-specific exonuclease RecJ (EC 3.1.-.-);Ontology_term
XLOC_000525	XLOC_000525	Scaffold_1:778335-778848	C	T	OK	477.055	453.211	-0.0739734	-0.287299	Adenine phosphoribosyltransferase (EC 2.4.2.7);Ontology_term
XLOC_000526	XLOC_000526	Scaffold_1:779017-781219	C	T	OK	376.171	369.545	-0.0256397	-0.122043	GTP pyrophosphokinase (EC 2.7.6.5)%2C (p)ppGpp synthetase I;Ontology_term
XLOC_000527	XLOC_000527	Scaffold_1:781232-781676	C	T	OK	162.968	141.653	-0.202228	-0.66949	D-tyrosyl-tRNA(Tyr) deacylase (EC 3.6.1.n1)
XLOC_000528	XLOC_000528	Scaffold_1:783417-783582	C	T	OK	1597.65	1316.52	-0.279221	-0.690822	YrzK
XLOC_000529	XLOC_000529	Scaffold_1:783956-785231	C	T	OK	320.816	290.993	-0.14076	-0.63834	Histidyl-tRNA synthetase (EC 6.1.1.21);Ontology_term
XLOC_000530	XLOC_000530	Scaffold_1:785245-787024	C	T	OK	366.8	353.934	-0.051511	-0.242051	Aspartyl-tRNA synthetase (EC 6.1.1.12);Ontology_term
XLOC_000531	XLOC_000531	Scaffold_1:787190-787325	C	T	NOTEST	0	0	0	0	hypothetical protein
XLOC_000532	XLOC_000532	Scaffold_1:787443-788208	C	T	OK	279.398	267.274	-0.0640014	-0.250733	HesA/MoeB/ThiF family protein related to EC-YgdL
XLOC_000533	XLOC_000533	Scaffold_1:790194-790611	C	T	OK	306.92	344.814	0.167955	0.593321	Iron-sulfur cluster regulator IscR
XLOC_000534	XLOC_000534	Scaffold_1:790631-791771	C	T	OK	247.395	278.099	0.168781	0.746919	Cysteine desulfurase (EC 2.8.1.7);Ontology_term
XLOC_000535	XLOC_000535	Scaffold_1:791876-793068	C	T	OK	3072.69	273.094	-3.49203	-0.599267	tRNA-specific 2-thiouridylase MnmA
XLOC_000536	XLOC_000536	Scaffold_1:793089-793740	C	T	OK	276.382	295.807	0.0979956	0.378453	Tetratricopeptide repeat (TPR) family protein
XLOC_000537	XLOC_000537	Scaffold_1:793791-796188	C	T	OK	287.806	299.814	0.0589689	0.279505	RecD-like DNA helicase YrrC
XLOC_000538	XLOC_000538	Scaffold_1:796276-796741	C	T	OK	111.572	116.337	0.0603293	0.196526	BH1264 unknown conserved protein in B. subtilis
XLOC_000539	XLOC_000539	Scaffold_1:796756-796948	C	T	OK	101.822	67.7546	-0.587658	-0.689787	BH1265 unknown
XLOC_000540	XLOC_000540	Scaffold_1:796963-797095	C	T	OK	439.48	0	#NAME?	#NAME?	hypothetical protein
XLOC_000541	XLOC_000541	Scaffold_1:797182-798241	C	T	OK	425.17	429.952	0.0161342	0.0741969	UPF0118 membrane protein YrrI
XLOC_000542	XLOC_000542	Scaffold_1:798588-801225	C	T	OK	216.8	223.31	0.0426799	0.200492	Alanyl-tRNA synthetase (EC 6.1.1.7);Ontology_term
XLOC_000543	XLOC_000543	Scaffold_1:801308-801575	C	T	OK	176.156	129.603	-0.442754	-1.03609	FIG01055109: hypothetical protein
XLOC_000544	XLOC_000544	Scaffold_1:801581-802001	C	T	OK	282.108	333.671	0.242178	0.864172	Putative Holliday junction resolvase YggF
XLOC_000545	XLOC_000545	Scaffold_1:802011-802296	C	T	OK	76.9055	63.1536	-0.284221	-0.606705	Ortholog of S. aureus MRSA252 (BX571856) SAR1694
XLOC_000546	XLOC_000546	Scaffold_1:802490-803603	C	T	OK	284.818	288.694	0.0195001	0.0835366	FIG004453: protein YceG like
XLOC_000547	XLOC_000547	Scaffold_1:803749-805338	C	T	OK	422.704	460.209	0.122641	0.512689	FIG011945: O-methyltransferase family protein
XLOC_000548	XLOC_000548	Scaffold_1:805352-806621	C	T	OK	298.843	312.447	0.0642258	0.289181	peptidase%2C U32 family large subunit [C1]
XLOC_000549	XLOC_000549	Scaffold_1:806625-807261	C	T	OK	420.252	425.304	0.017239	0.068756	Uridine kinase (EC 2.7.1.48) [C1];Ontology_term
XLOC_000550	XLOC_000550	Scaffold_1:807499-807976	C	T	OK	438.806	464.349	0.0816265	0.309069	Transcription elongation factor GreA
XLOC_000551	XLOC_000551	Scaffold_1:808030-809785	C	T	OK	297.035	333.256	0.165999	0.776592	Cell division protein FtsI [Peptidoglycan synthetase] (EC 2.4.1.129);Ontology_term
XLOC_000552	XLOC_000552	Scaffold_1:809843-810536	C	T	OK	262.654	270.007	0.0398347	0.151095	Hypothetical protein perhaps functionally coupled to transcription elongation factor GreA
XLOC_000553	XLOC_000553	Scaffold_1:810968-811610	C	T	OK	375.882	339.503	-0.146858	-0.593534	SAM-dependent methlytransferase YrrT
XLOC_000554	XLOC_000554	Scaffold_1:811631-812327	C	T	OK	206.463	221.071	0.0986263	0.368993	5'-methylthioadenosine nucleosidase (EC 3.2.2.16) / S-adenosylhomocysteine nucleosidase (EC 3.2.2.9);Ontology_term
XLOC_000555	XLOC_000555	Scaffold_1:812378-813302	C	T	OK	421.988	412.233	-0.0337411	-0.153125	Cystathionine beta-synthase (EC 4.2.1.22);Ontology_term
XLOC_000556	XLOC_000556	Scaffold_1:813303-814446	C	T	OK	378.069	380.294	0.00846679	0.0388028	Cystathionine gamma-lyase (EC 4.4.1.1);Ontology_term
XLOC_000557	XLOC_000557	Scaffold_1:814461-814767	C	T	OK	28.5902	49.3169	0.786563	1.36401	FIG01228109: hypothetical protein
XLOC_000558	XLOC_000558	Scaffold_1:815172-815322	C	T	OK	364.914	168.103	-1.11821	-0.830385	unknown
XLOC_000559	XLOC_000559	Scaffold_1:815479-815644	C	T	OK	38.5651	67.3217	0.803775	0.531802	FIG01237872: hypothetical protein
XLOC_000560	XLOC_000560	Scaffold_1:816183-816789	C	T	OK	266.246	215.368	-0.305957	-1.12064	FIG01230763: hypothetical protein
XLOC_000561	XLOC_000561	Scaffold_1:816959-820103	C	T	OK	416.693	399.175	-0.0619619	-0.299867	cell wall-associated protease precursor
XLOC_000562	XLOC_000562	Scaffold_1:820234-820943	C	T	OK	325.306	308.111	-0.0783462	-0.289196	Fatty acid degradation regulator YsiA%2C TetR family
XLOC_000563	XLOC_000563	Scaffold_1:820976-824201	C	T	OK	375.706	356.273	-0.0766181	-0.370941	Probable bifunctional P-450/NADPH-P450 reductase CypD
XLOC_000564	XLOC_000564	Scaffold_1:824508-824685	C	T	OK	287.734	255.959	-0.168822	-0.262164	hypothetical protein
XLOC_000565	XLOC_000565	Scaffold_1:826093-826993	C	T	OK	589.005	557.521	-0.0792527	-0.369769	transcriptional regulator YbbE
XLOC_000566	XLOC_000566	Scaffold_1:827070-828024	C	T	OK	333.079	368.172	0.144516	0.636033	Ferrichrome-binding periplasmic protein precursor (TC 3.A.1.14.3)
XLOC_000567	XLOC_000567	Scaffold_1:829115-829943	C	T	OK	392.019	423.463	0.111311	0.481956	Uroporphyrinogen-III synthase (EC 4.2.1.75);Ontology_term
XLOC_000568	XLOC_000568	Scaffold_1:831415-832684	C	T	OK	613.559	560.169	-0.131339	-0.620592	L-Proline/Glycine betaine transporter ProP
XLOC_000569	XLOC_000569	Scaffold_1:832714-833560	C	T	OK	500.759	499.394	-0.00393827	-0.0178041	oxidoreductase of aldo/keto reductase family%2C subgroup 1
XLOC_000570	XLOC_000570	Scaffold_1:834282-835956	C	T	OK	413.558	378.132	-0.129198	-0.606706	Potassium-transporting ATPase A chain (EC 3.6.3.12) (TC 3.A.3.7.1);Ontology_term
XLOC_000571	XLOC_000571	Scaffold_1:835969-838042	C	T	OK	401.843	391.304	-0.0383402	-0.182868	Potassium-transporting ATPase B chain (EC 3.6.3.12) (TC 3.A.3.7.1);Ontology_term
XLOC_000572	XLOC_000572	Scaffold_1:838054-838615	C	T	OK	520.929	458.888	-0.182945	-0.761609	Potassium-transporting ATPase C chain (EC 3.6.3.12) (TC 3.A.3.7.1);Ontology_term
XLOC_000573	XLOC_000573	Scaffold_1:838684-840375	C	T	OK	249.356	249.058	-0.00172953	-0.00604413	Osmosensitive K+ channel histidine kinase KdpD (EC 2.7.3.-);Ontology_term
XLOC_000574	XLOC_000574	Scaffold_1:840973-841808	C	T	OK	404.886	385.298	-0.0715419	-0.276909	hypothetical protein
XLOC_000575	XLOC_000575	Scaffold_1:842271-842730	C	T	OK	118.957	98.1791	-0.27695	-0.859968	Uncharacterized protein yozF precursor
XLOC_000576	XLOC_000576	Scaffold_1:843134-845921	C	T	OK	272.377	281.171	0.045844	0.217434	NtrC family Transcriptional regulator%2C ATPase domain
XLOC_000577	XLOC_000577	Scaffold_1:846121-847050	C	T	OK	456.037	524.396	0.201506	0.755	PTS system%2C mannose-specific IIA component (EC 2.7.1.69) / PTS system%2C fructose-specific IIA component (EC 2.7.1.69);Ontology_term
XLOC_000578	XLOC_000578	Scaffold_1:847068-847872	C	T	OK	429.663	405.934	-0.0819593	-0.35989	PTS system%2C mannose-specific IIC component (EC 2.7.1.69);Ontology_term
XLOC_000579	XLOC_000579	Scaffold_1:847893-848721	C	T	OK	551.136	567.493	0.0421955	0.191155	PTS system%2C mannose-specific IID component (EC 2.7.1.69);Ontology_term
XLOC_000580	XLOC_000580	Scaffold_1:848850-850884	C	T	OK	440.4	441.557	0.00378525	0.0181818	Sucrose-6-phosphate hydrolase (EC 3.2.1.B3)
XLOC_000581	XLOC_000581	Scaffold_1:852755-854262	C	T	OK	340.428	297.737	-0.193311	-0.883754	Xyloside transporter XynT
XLOC_000582	XLOC_000582	Scaffold_1:854314-855916	C	T	OK	446.155	403.215	-0.145996	-0.694444	Beta-xylosidase (EC 3.2.1.37);Ontology_term
XLOC_000583	XLOC_000583	Scaffold_1:856307-857195	C	T	OK	618.086	535.189	-0.207759	-0.960749	membrane protein%2C putative
XLOC_000584	XLOC_000584	Scaffold_1:857639-858875	C	T	OK	799.322	710.594	-0.169752	-0.812997	putative cytochrome P450 hydroxylase
XLOC_000585	XLOC_000585	Scaffold_1:859268-860108	C	T	OK	332.486	332.355	-0.000570917	-0.00243165	PROBABLE ESTERASE/LIPASE PROTEIN( EC:3.1.1.- );Ontology_term
XLOC_000586	XLOC_000586	Scaffold_1:860544-862155	C	T	OK	467.314	432.435	-0.111907	-0.53237	Uncharacterized protein%2C containing predicted phosphatase domain
XLOC_000587	XLOC_000587	Scaffold_1:866696-866819	C	T	NOTEST	0	0	0	0	hypothetical protein
XLOC_000588	XLOC_000588	Scaffold_1:872051-872210	C	T	OK	18.3578	40.2199	1.13152	0.563429	hypothetical protein
XLOC_000589	XLOC_000589	Scaffold_1:872248-873298	C	T	OK	456.991	431.581	-0.0825329	-0.382383	Thioredoxin reductase (EC 1.8.1.9);Ontology_term
XLOC_000590	XLOC_000590	Scaffold_1:876555-876903	C	T	OK	609.989	589.728	-0.0487324	-0.178665	Transcriptional regulator HxlR%2C formaldehyde assimilation
XLOC_000591	XLOC_000591	Scaffold_1:877087-877714	C	T	OK	431.048	376.018	-0.197047	-0.805908	D-arabino-3-hexulose 6-phosphate formaldehyde lyase
XLOC_000592	XLOC_000592	Scaffold_1:877716-878274	C	T	OK	660.12	560.376	-0.236332	-0.997605	6-phospho-3-hexuloisomerase
XLOC_000594	XLOC_000594	Scaffold_1:880640-880769	C	T	OK	352.575	0	#NAME?	#NAME?	hypothetical protein
XLOC_000595	XLOC_000595	Scaffold_1:880945-881170	C	T	OK	371.218	292.085	-0.345879	-0.849259	hypothetical protein
XLOC_000596	XLOC_000596	Scaffold_1:881451-882291	C	T	OK	482.1	432.503	-0.156623	-0.702612	Porphobilinogen synthase (EC 4.2.1.24);Ontology_term
XLOC_000597	XLOC_000597	Scaffold_1:887681-890601	C	T	OK	864.809	784.195	-0.141168	-0.676652	hydrolase%2C CocE/NonD family
XLOC_000598	XLOC_000598	Scaffold_1:890648-891242	C	T	OK	85.072	106.323	0.321694	1.02981	Global nitrogen regulator
XLOC_000599	XLOC_000599	Scaffold_1:891613-893475	C	T	OK	1147.7	1126.9	-0.0263827	-0.121254	hypothetical protein
XLOC_000600	XLOC_000600	Scaffold_1:893717-894341	C	T	OK	203.638	161.711	-0.332591	-1.16913	D-alanyl-D-alanine carboxypeptidase (EC 3.4.16.4);Ontology_term
XLOC_000601	XLOC_000601	Scaffold_1:894725-895433	C	T	OK	308.812	301.169	-0.0361535	-0.14101	FIG01230389: hypothetical protein
XLOC_000602	XLOC_000602	Scaffold_1:895477-896074	C	T	OK	175.123	184.87	0.0781419	0.27191	Ubiquinone/menaquinone biosynthesis methyltransferase UbiE (EC 2.1.1.-) @ 2-heptaprenyl-1%2C4-naphthoquinone methyltransferase (EC 2.1.1.163);Ontology_term
XLOC_000603	XLOC_000603	Scaffold_1:896384-896513	C	T	OK	196.849	0	#NAME?	#NAME?	hypothetical protein
XLOC_000604	XLOC_000604	Scaffold_1:899451-900006	C	T	OK	261.766	203.584	-0.362651	-1.274	transcriptional regulator
XLOC_000605	XLOC_000605	Scaffold_1:900659-901421	C	T	OK	269.082	258.819	-0.0561019	-0.215959	FIG01252213: hypothetical protein
XLOC_000606	XLOC_000606	Scaffold_1:902163-902406	C	T	OK	73.3998	48.8801	-0.58653	-1.01968	hypothetical protein
XLOC_000607	XLOC_000607	Scaffold_1:902705-902966	C	T	OK	261.339	268.1	0.0368485	0.108106	FIG007303: uncharacterized protein
XLOC_000608	XLOC_000608	Scaffold_1:903132-903615	C	T	OK	438.693	461.128	0.0719554	0.270522	Putative sulfide reductase
XLOC_000609	XLOC_000609	Scaffold_1:903708-904287	C	T	OK	848.416	829.074	-0.0332714	-0.150354	Rhodanese-like domain protein
XLOC_000610	XLOC_000610	Scaffold_1:904357-905488	C	T	OK	562.257	511.753	-0.135784	-0.631047	Zn-dependent hydroxyacylglutathione hydrolase / Polysulfide binding protein
XLOC_000611	XLOC_000611	Scaffold_1:905519-905747	C	T	OK	145.186	124.308	-0.223976	-0.439424	Rhodanese-like domain protein
XLOC_000612	XLOC_000612	Scaffold_1:905801-906584	C	T	OK	398.308	373.176	-0.0940278	-0.394658	FIG003846: hypothetical protein
XLOC_000613	XLOC_000613	Scaffold_1:906620-906956	C	T	OK	319.606	304.882	-0.0680435	-0.218948	Thioredoxin
XLOC_000614	XLOC_000614	Scaffold_1:906974-908677	C	T	OK	587.257	594.26	0.0171009	0.0759698	Two component sensor histidine kinase
XLOC_000615	XLOC_000615	Scaffold_1:908835-910035	C	T	OK	344.738	338.145	-0.0278559	-0.125993	FIG002984: FAD-dependent pyridine nucleotide-disulphide oxidoreductase
XLOC_000616	XLOC_000616	Scaffold_1:910082-911625	C	T	OK	618.67	562.283	-0.137872	-0.658818	Zn-dependent hydroxyacylglutathione hydrolase / Polysulfide binding protein
XLOC_000617	XLOC_000617	Scaffold_1:911854-912313	C	T	OK	520.563	576.017	0.14604	0.557152	hypothetical protein
XLOC_000618	XLOC_000618	Scaffold_1:912662-912812	C	T	OK	0	73.1941	inf	#NAME?	hypothetical protein
XLOC_000619	XLOC_000619	Scaffold_1:914486-915983	C	T	OK	405.39	382.181	-0.0850526	-0.396009	Nitrate/nitrite transporter
XLOC_000620	XLOC_000620	Scaffold_1:916035-921259	C	T	OK	926.482	878.845	-0.0761546	-0.336979	Respiratory nitrate reductase alpha chain (EC 1.7.99.4);Ontology_term
XLOC_000621	XLOC_000621	Scaffold_1:921263-921794	C	T	OK	212.949	202.332	-0.0737859	-0.255287	Respiratory nitrate reductase delta chain (EC 1.7.99.4);Ontology_term
XLOC_000622	XLOC_000622	Scaffold_1:921814-922516	C	T	OK	524.65	529.849	0.0142247	0.0633155	Respiratory nitrate reductase gamma chain (EC 1.7.99.4);Ontology_term
XLOC_000623	XLOC_000623	Scaffold_1:923404-924562	C	T	OK	520.843	460.698	-0.177028	-0.8326	2-methylaconitate cis-trans isomerase
XLOC_000624	XLOC_000624	Scaffold_1:925356-925929	C	T	OK	180.978	175.009	-0.0483796	-0.166095	Cys regulon transcriptional activator CysB
XLOC_000625	XLOC_000625	Scaffold_1:926018-926201	C	T	OK	139.207	154.572	0.151049	0.287517	Cys regulon transcriptional activator CysB
XLOC_000626	XLOC_000626	Scaffold_1:926877-927723	C	T	OK	403.677	373.407	-0.112452	-0.470815	Transcriptional regulator%2C MerR family
XLOC_000627	XLOC_000627	Scaffold_1:927764-927914	C	T	OK	148.938	170.357	0.193851	0.144585	hypothetical protein
XLOC_000628	XLOC_000628	Scaffold_1:927963-928533	C	T	OK	249.973	237.652	-0.0729176	-0.261793	flavin reductase domain protein FMN-binding
XLOC_000629	XLOC_000629	Scaffold_1:929645-930974	C	T	OK	468.131	426.53	-0.134263	-0.626154	6-phospho-beta-glucosidase (EC 3.2.1.86);Ontology_term
XLOC_000630	XLOC_000630	Scaffold_1:931031-931847	C	T	OK	200.891	187.038	-0.103083	-0.386691	HMP-PP hydrolase (pyridoxal phosphatase) Cof%2C detected in genetic screen for thiamin metabolic genes (PMID:15292217)
XLOC_000631	XLOC_000631	Scaffold_1:932263-932383	C	T	NOTEST	0	0	0	0	hypothetical protein
XLOC_000632	XLOC_000632	Scaffold_1:932965-933490	C	T	OK	107.005	106.801	-0.0027515	-0.00893937	GCN5-related N-acetyltransferase
XLOC_000633	XLOC_000633	Scaffold_1:933573-933738	C	T	OK	908.99	948.024	0.060659	0.122131	FIG01107895: hypothetical protein
XLOC_000634	XLOC_000634	Scaffold_1:936404-937745	C	T	OK	0	219.849	inf	#NAME?	hypothetical protein
XLOC_000635	XLOC_000635	Scaffold_1:937886-939867	C	T	OK	582.662	535.788	-0.120998	-0.520163	DNA-binding response regulator
XLOC_000636	XLOC_000636	Scaffold_1:939909-940329	C	T	OK	191.775	186.736	-0.038416	-0.12254	phosphate-starvation-inducible protein PsiE
XLOC_000637	XLOC_000637	Scaffold_1:942010-942181	C	T	OK	367.906	324.659	-0.18041	-0.352131	YolD
XLOC_000638	XLOC_000638	Scaffold_1:945711-945891	C	T	OK	79.5816	113.085	0.506896	0.5253	hypothetical protein
XLOC_000639	XLOC_000639	Scaffold_1:949712-950087	C	T	OK	387.125	488.776	0.336375	1.17989	FIG01225689: hypothetical protein
XLOC_000640	XLOC_000640	Scaffold_1:950115-950880	C	T	OK	153.666	176.209	0.19749	0.724282	Rhodopsin-like GPCR superfamily
XLOC_000641	XLOC_000641	Scaffold_1:951024-951756	C	T	OK	242.509	287.906	0.247559	0.97935	unknown
XLOC_000642	XLOC_000642	Scaffold_1:951833-951989	C	T	OK	627.042	1153.36	0.879202	1.37038	hypothetical protein
XLOC_000643	XLOC_000643	Scaffold_1:952570-953131	C	T	OK	152.726	148.126	-0.0441252	-0.150373	FIG001553: Hydrolase%2C HAD subfamily IIIA
XLOC_000644	XLOC_000644	Scaffold_1:953134-954235	C	T	OK	340.812	386.458	0.181334	0.826764	GTP-binding protein YqeH%2C required for biogenesis of 30S ribosome subunit
XLOC_000645	XLOC_000645	Scaffold_1:954254-955375	C	T	OK	464.137	521.509	0.16814	0.474568	Shikimate 5-dehydrogenase I alpha (EC 1.1.1.25);Ontology_term
XLOC_000646	XLOC_000646	Scaffold_1:955393-956516	C	T	OK	612.156	683.09	0.158175	0.676483	Nicotinate-nucleotide adenylyltransferase (EC 2.7.7.18);Ontology_term
XLOC_000647	XLOC_000647	Scaffold_1:956529-957638	C	T	OK	274.961	306.577	0.157022	0.488614	Iojap protein
XLOC_000648	XLOC_000648	Scaffold_1:958612-959242	C	T	OK	125.532	154.856	0.302876	1.07375	Late competence protein ComEA%2C DNA receptor
XLOC_000649	XLOC_000649	Scaffold_1:959310-959880	C	T	OK	263.65	260.393	-0.0179352	-0.068041	dCMP deaminase (EC 3.5.4.12)%3B Late competence protein ComEB;Ontology_term
XLOC_000650	XLOC_000650	Scaffold_1:959884-962272	C	T	OK	404.459	400.168	-0.0153881	-0.07353	Late competence protein ComEC%2C DNA transport
XLOC_000651	XLOC_000651	Scaffold_1:962636-963683	C	T	OK	245.512	317.961	0.373056	1.60576	DNA polymerase III delta subunit (EC 2.7.7.7);Ontology_term
XLOC_000652	XLOC_000652	Scaffold_1:964566-964923	C	T	OK	431.31	388.073	-0.152398	-0.532301	Transcriptional regulator%2C HxlR family
XLOC_000653	XLOC_000653	Scaffold_1:965181-965577	C	T	OK	115.463	138.16	0.258908	0.797643	FIG01226489: hypothetical protein
XLOC_000654	XLOC_000654	Scaffold_1:965907-966326	C	T	OK	40.5773	20.3364	-0.996607	-0.469747	hypothetical protein
XLOC_000655	XLOC_000655	Scaffold_1:966530-967637	C	T	OK	361.821	348.288	-0.0549961	-0.25082	Endopeptidase spore protease Gpr (EC 3.4.24.78);Ontology_term
XLOC_000656	XLOC_000656	Scaffold_1:967754-968960	C	T	OK	309.175	331.892	0.102289	0.466634	Stage II sporulation protein P
XLOC_000657	XLOC_000657	Scaffold_1:968968-969298	C	T	OK	802.608	731.762	-0.133319	-0.48206	FIG01227686: hypothetical protein
XLOC_000658	XLOC_000658	Scaffold_1:969443-971282	C	T	OK	318.647	323.363	0.0211961	0.0995772	Translation elongation factor LepA
XLOC_000659	XLOC_000659	Scaffold_1:971341-972481	C	T	OK	193.025	222.903	0.207628	0.867935	Hypothetical radical SAM family enzyme in heat shock gene cluster%2C similarity with CPO of BS HemN-type
XLOC_000660	XLOC_000660	Scaffold_1:972561-973593	C	T	OK	165.061	213.377	0.370405	1.46366	Heat-inducible transcription repressor HrcA
XLOC_000661	XLOC_000661	Scaffold_1:973672-974257	C	T	OK	176.973	159.377	-0.15109	-0.519718	Heat shock protein GrpE
XLOC_000662	XLOC_000662	Scaffold_1:974280-976119	C	T	OK	355.741	323.061	-0.139021	-0.650903	Chaperone protein DnaK
XLOC_000663	XLOC_000663	Scaffold_1:976301-977429	C	T	OK	244.143	272.961	0.160972	0.706916	Chaperone protein DnaJ
XLOC_000664	XLOC_000664	Scaffold_1:977452-978388	C	T	OK	433.988	405.536	-0.0978225	-0.441342	Ribosomal protein L11 methyltransferase (EC 2.1.1.-);Ontology_term
XLOC_000665	XLOC_000665	Scaffold_1:978411-979179	C	T	OK	281.799	285.687	0.0197678	0.0803989	Ribosomal RNA small subunit methyltransferase E (EC 2.1.1.-);Ontology_term
XLOC_000666	XLOC_000666	Scaffold_1:979181-980537	C	T	OK	365.343	332.018	-0.13799	-0.637808	tRNA-t(6)A37 methylthiotransferase
XLOC_000667	XLOC_000667	Scaffold_1:980626-981298	C	T	OK	219.377	235.394	0.101663	0.371305	Deoxyribose-phosphate aldolase (EC 4.1.2.4);Ontology_term
XLOC_000668	XLOC_000668	Scaffold_1:981316-982313	C	T	NOTEST	0	0	0	0	hypothetical protein
XLOC_000669	XLOC_000669	Scaffold_1:982437-982611	C	T	OK	152.701	93.6281	-0.705701	-0.717665	SSU ribosomal protein S21p
XLOC_000670	XLOC_000670	Scaffold_1:982625-983072	C	T	OK	232.129	247.333	0.0915297	0.304807	Transamidase GatB domain protein
XLOC_000671	XLOC_000671	Scaffold_1:983215-984535	C	T	OK	325.505	293.339	-0.150107	-0.685411	FIG01226563: hypothetical protein
XLOC_000672	XLOC_000672	Scaffold_1:984558-985551	C	T	OK	294.742	265.156	-0.152608	-0.658476	hypothetical protein
XLOC_000673	XLOC_000673	Scaffold_1:985580-986033	C	T	OK	497.022	470.909	-0.0778618	-0.281526	FIG01232279: hypothetical protein
XLOC_000674	XLOC_000674	Scaffold_1:986088-986370	C	T	OK	242.729	173.013	-0.488464	-1.3798	FIG01225215: hypothetical protein
XLOC_000675	XLOC_000675	Scaffold_1:986387-988540	C	T	OK	914.744	850.778	-0.104585	-0.488631	Stage IV sporulation protein
XLOC_000676	XLOC_000676	Scaffold_1:988605-991590	C	T	OK	834.016	818.737	-0.0266755	-0.0667686	Membrane protein containing HD superfamily hydrolase domain%2C YQFF ortholog
XLOC_000677	XLOC_000677	Scaffold_1:991722-993019	C	T	OK	383.678	379.253	-0.0167326	-0.05796	Cytidine deaminase (EC 3.5.4.5);Ontology_term
XLOC_000678	XLOC_000678	Scaffold_1:993180-993324	C	T	OK	503.284	280.826	-0.841694	-0.71342	hypothetical protein
XLOC_000679	XLOC_000679	Scaffold_1:993361-994132	C	T	OK	247.737	244.397	-0.019583	-0.0767808	DNA recombination and repair protein RecO
XLOC_000680	XLOC_000680	Scaffold_1:994463-997383	C	T	OK	642.912	645.101	0.00490277	0.021222	Glycyl-tRNA synthetase alpha chain (EC 6.1.1.14);Ontology_term
XLOC_000681	XLOC_000681	Scaffold_1:997526-998219	C	T	OK	328.245	293.5	-0.161413	-0.638064	CBS domain protein%2C lmo1865 homolog
XLOC_000682	XLOC_000682	Scaffold_1:998244-999057	C	T	OK	388.954	385.067	-0.0144914	-0.0635833	ATP/GTP-binding protein%2C SA1392 homolog
XLOC_000683	XLOC_000683	Scaffold_1:999321-999813	C	T	OK	339.663	401.428	0.241036	0.908109	FIG01228064: hypothetical protein
XLOC_000684	XLOC_000684	Scaffold_1:999845-1001669	C	T	OK	278.47	268.987	-0.049989	-0.231213	DNA primase (EC 2.7.7.-);Ontology_term
XLOC_000685	XLOC_000685	Scaffold_1:1001701-1001839	C	T	OK	98.5465	0	#NAME?	#NAME?	hypothetical protein
XLOC_000686	XLOC_000686	Scaffold_1:1001875-1002997	C	T	OK	300.519	350.455	0.221769	0.985915	RNA polymerase sigma factor RpoD
XLOC_000687	XLOC_000687	Scaffold_1:1003352-1003712	C	T	OK	371.748	354.609	-0.0680941	-0.227292	Membrane-attached cytochrome c550
XLOC_000688	XLOC_000688	Scaffold_1:1004070-1004768	C	T	OK	278.08	243.914	-0.18913	-0.471917	unknown
XLOC_000689	XLOC_000689	Scaffold_1:1004793-1006806	C	T	OK	282.49	293.593	0.0556144	0.260491	Putative toxin component near putative ESAT-related proteins%2C repetitive / Repetitive hypothetical protein near ESAT cluster%2C SA0282 homolog
XLOC_000690	XLOC_000690	Scaffold_1:1006822-1007338	C	T	OK	72.5886	66.2566	-0.131679	-0.403415	conserved hypothetical protein%2C CF-22 family
XLOC_000691	XLOC_000691	Scaffold_1:1007875-1007992	C	T	NOTEST	0	0	0	0	hypothetical protein
XLOC_000692	XLOC_000692	Scaffold_1:1008287-1008623	C	T	OK	98.0396	106.939	0.125355	0.333272	FIG01237649: hypothetical protein
XLOC_000693	XLOC_000693	Scaffold_1:1009614-1010265	C	T	OK	221.056	291.134	0.397272	1.4512	FIG01235465: hypothetical protein
XLOC_000694	XLOC_000694	Scaffold_1:1010462-1010687	C	T	OK	135.334	65.0619	-1.05664	-1.86461	FIG01235248: hypothetical protein
XLOC_000695	XLOC_000695	Scaffold_1:1010888-1011638	C	T	OK	155.693	207.945	0.417504	1.51299	Endonuclease V (EC 3.1.21.7);Ontology_term
XLOC_000696	XLOC_000696	Scaffold_1:1011763-1013559	C	T	OK	399.988	496.355	0.311415	1.31169	Putative tRNA-m1A22 methylase
XLOC_000697	XLOC_000697	Scaffold_1:1015556-1016876	C	T	OK	81.0822	94.5456	0.221624	0.827374	DEAD-box ATP-dependent RNA helicase CshB (EC 3.6.4.13);Ontology_term
XLOC_000698	XLOC_000698	Scaffold_1:1016887-1017781	C	T	OK	224.99	265.092	0.236631	0.969358	Endonuclease IV (EC 3.1.21.2);Ontology_term
XLOC_000699	XLOC_000699	Scaffold_1:1018191-1019076	C	T	OK	132.717	167.904	0.339281	1.23939	Uncharacterized membrane protein Bsu2508 (YqfU)
XLOC_000700	XLOC_000700	Scaffold_1:1019099-1021265	C	T	OK	301.973	318.014	0.0746749	0.349621	Zinc ABC transporter%2C ATP-binding protein ZnuC
XLOC_000701	XLOC_000701	Scaffold_1:1022057-1022429	C	T	OK	494.081	435.425	-0.182324	-0.639321	FIG01226626: hypothetical protein
XLOC_000702	XLOC_000702	Scaffold_1:1025224-1025707	C	T	OK	552.109	448.22	-0.300747	-1.13674	probable membrane protein NMA1128
XLOC_000703	XLOC_000703	Scaffold_1:1025889-1026498	C	T	OK	207.29	206.729	-0.00391082	-0.0138018	Manganese superoxide dismutase (EC 1.15.1.1);Ontology_term
XLOC_000704	XLOC_000704	Scaffold_1:1026880-1028167	C	T	OK	396.248	419.907	0.0836683	0.386775	membrane protein%2C putative
XLOC_000705	XLOC_000705	Scaffold_1:1028268-1030392	C	T	OK	358.775	356.569	-0.00890012	-0.0421265	Cell division protein FtsI [Peptidoglycan synthetase] (EC 2.4.1.129) / Transpeptidase%2C Penicillin binding protein transpeptidase domain;Ontology_term
XLOC_000706	XLOC_000706	Scaffold_1:1030584-1031502	C	T	OK	254.323	267.552	0.0731592	0.292594	Phosphate ABC transporter%2C periplasmic phosphate-binding protein PstS (TC 3.A.1.7.1)
XLOC_000707	XLOC_000707	Scaffold_1:1031577-1033394	C	T	OK	840.501	831.113	-0.016204	-0.07529	Phosphate transport system permease protein PstC (TC 3.A.1.7.1)
XLOC_000708	XLOC_000708	Scaffold_1:1033413-1034241	C	T	OK	103.857	116.106	0.160849	0.557674	Phosphate transport ATP-binding protein PstB (TC 3.A.1.7.1)
XLOC_000709	XLOC_000709	Scaffold_1:1034253-1035033	C	T	OK	347.68	359.41	0.0478713	0.1983	Phosphate transport ATP-binding protein PstB (TC 3.A.1.7.1)
XLOC_000710	XLOC_000710	Scaffold_1:1035501-1036257	C	T	OK	132.383	151.435	0.19398	0.644947	hypothetical protein
XLOC_000711	XLOC_000711	Scaffold_1:1036485-1036626	C	T	OK	88.6923	98.6484	0.153486	0.0621496	hypothetical protein
XLOC_000712	XLOC_000712	Scaffold_1:1036698-1039097	C	T	OK	314.398	306.813	-0.0352356	-0.137454	hypothetical protein
XLOC_000713	XLOC_000713	Scaffold_1:1039435-1039648	C	T	OK	41.3985	20.2991	-1.02816	-1.18631	hypothetical protein
XLOC_000714	XLOC_000714	Scaffold_1:1041757-1043364	C	T	OK	372.2	386.722	0.0552169	0.184699	unknown
XLOC_000715	XLOC_000715	Scaffold_1:1043666-1044239	C	T	OK	366.12	343.568	-0.0917237	-0.35025	5-formyltetrahydrofolate cyclo-ligase (EC 6.3.3.2);Ontology_term
XLOC_000716	XLOC_000716	Scaffold_1:1044281-1044455	C	T	OK	956.974	847.446	-0.175358	-0.380675	unknown
XLOC_000717	XLOC_000717	Scaffold_1:1044551-1046090	C	T	OK	411.195	426.559	0.0529237	0.250443	FIG056164: rhomboid family serine protease
XLOC_000718	XLOC_000718	Scaffold_1:1046166-1047621	C	T	OK	419.034	396.735	-0.0788911	-0.37119	Stage V sporulation protein AF (SpoVAF)
XLOC_000719	XLOC_000719	Scaffold_1:1047721-1047919	C	T	OK	60.9897	95.5436	0.647593	0.808352	FIG01225596: hypothetical protein
XLOC_000720	XLOC_000720	Scaffold_1:1047943-1048918	C	T	OK	300.765	309.801	0.0427034	0.189347	Glucokinase (EC 2.7.1.2);Ontology_term
XLOC_000721	XLOC_000721	Scaffold_1:1049099-1050998	C	T	OK	362.349	323.072	-0.165522	-0.776196	Lipoteichoic acid synthase LtaS Type IIIa
XLOC_000722	XLOC_000722	Scaffold_1:1051172-1051937	C	T	OK	268.497	296.065	0.141009	0.558131	Ferrichrome-binding periplasmic protein precursor (TC 3.A.1.14.3)
XLOC_000723	XLOC_000723	Scaffold_1:1051969-1052113	C	T	OK	90.9547	100.792	0.148155	0.0599908	Ferrichrome-binding periplasmic protein precursor (TC 3.A.1.14.3)
XLOC_000724	XLOC_000724	Scaffold_1:1052147-1053369	C	T	OK	519.741	439.023	-0.243497	-0.0967717	hypothetical protein
XLOC_000725	XLOC_000725	Scaffold_1:1053423-1054533	C	T	OK	306.642	309.138	0.0116969	0.0523325	unknown
XLOC_000726	XLOC_000726	Scaffold_1:1054548-1054863	C	T	OK	82.6703	97.1294	0.232539	0.601009	hypothetical protein
XLOC_000727	XLOC_000727	Scaffold_1:1055252-1055891	C	T	OK	522.155	436.875	-0.257258	-1.08188	Similar to Hydroxyacylglutathione hydrolase%2C but in an organism lacking glutathione biosynthesis
XLOC_000728	XLOC_000728	Scaffold_1:1056382-1056760	C	T	OK	839.511	759.044	-0.145366	-0.563037	YqgZ
XLOC_000729	XLOC_000729	Scaffold_1:1057001-1057841	C	T	OK	314.833	267.629	-0.234351	-0.95603	RsbR%2C positive regulator of sigma-B
XLOC_000730	XLOC_000730	Scaffold_1:1057846-1061944	C	T	OK	368.913	349.013	-0.0800011	-0.362885	Late competence protein ComGA%2C access of DNA to ComEA
XLOC_000731	XLOC_000731	Scaffold_1:1062032-1062215	C	T	OK	312.387	151.159	-1.04727	-1.74941	FIG01228056: hypothetical protein
XLOC_000732	XLOC_000732	Scaffold_1:1062842-1064152	C	T	OK	740.04	829.854	0.165255	0.72922	YqxM protein%2C required for localization of TasA to extracellular matrix
XLOC_000733	XLOC_000733	Scaffold_1:1064224-1065102	C	T	OK	361.057	345.318	-0.0643003	-0.260107	Stationary phase secreted protein TasA%2C major protein component of biofilm matrix
XLOC_000734	XLOC_000734	Scaffold_1:1068934-1070029	C	T	OK	344.41	393.205	0.191152	0.873173	Aminomethyltransferase (glycine cleavage system T protein) (EC 2.1.2.10);Ontology_term
XLOC_000735	XLOC_000735	Scaffold_1:1070059-1072856	C	T	OK	558.355	574.482	0.0410791	0.193353	Glycine dehydrogenase [decarboxylating] (glycine cleavage system P1 protein) (EC 1.4.4.2);Ontology_term
XLOC_000736	XLOC_000736	Scaffold_1:1073214-1076209	C	T	OK	1081.51	1084.71	0.00425946	0.019856	Glycine betaine ABC transport system%2C ATP-binding protein OpuAA (EC 3.6.3.32);Ontology_term
XLOC_000737	XLOC_000737	Scaffold_1:1076931-1077768	C	T	OK	453.495	441.079	-0.0400475	-0.176395	Lipoate-protein ligase A
XLOC_000738	XLOC_000738	Scaffold_1:1077859-1078288	C	T	OK	332.057	263.096	-0.335841	-1.18422	Mn-dependent transcriptional regulator MntR
XLOC_000739	XLOC_000739	Scaffold_1:1078419-1079678	C	T	OK	232.923	246.553	0.0820436	0.324961	lysophospholipase-like family protein
XLOC_000740	XLOC_000740	Scaffold_1:1080921-1081458	C	T	OK	341.458	323.281	-0.0789176	-0.297908	FIG01225396: hypothetical protein
XLOC_000741	XLOC_000741	Scaffold_1:1081537-1081975	C	T	OK	487.862	490.066	0.00650345	0.0235294	3-dehydroquinate dehydratase II (EC 4.2.1.10);Ontology_term
XLOC_000742	XLOC_000742	Scaffold_1:1081990-1083052	C	T	OK	576.522	509.312	-0.178827	-0.831707	Aminopeptidase YpdF (MP-%2C MA-%2C MS-%2C AP-%2C NP- specific)
XLOC_000743	XLOC_000743	Scaffold_1:1083083-1083726	C	T	OK	1018.37	1758.15	0.787792	0.213138	Translation elongation factor P
XLOC_000744	XLOC_000744	Scaffold_1:1083803-1084085	C	T	OK	72.2134	100.393	0.475319	1.06209	FIG01228228: hypothetical protein
XLOC_000745	XLOC_000745	Scaffold_1:1084176-1085609	C	T	OK	870.069	916.258	0.0746253	0.312966	Stage III sporulation protein AA
XLOC_000746	XLOC_000746	Scaffold_1:1085631-1085838	C	T	OK	197.581	165.501	-0.255603	-0.525369	Stage III sporulation protein AC
XLOC_000747	XLOC_000747	Scaffold_1:1085880-1086246	C	T	OK	171.542	152.318	-0.17147	-0.516089	Stage III sporulation protein AD
XLOC_000748	XLOC_000748	Scaffold_1:1086267-1087473	C	T	OK	371.505	361.2	-0.0405859	-0.185219	Stage III sporulation protein AE
XLOC_000749	XLOC_000749	Scaffold_1:1087484-1088802	C	T	OK	728.191	779.174	0.0976284	0.427465	Stage III sporulation protein AF
XLOC_000750	XLOC_000750	Scaffold_1:1088802-1089441	C	T	OK	341.178	315.396	-0.113363	-0.443363	Stage III sporulation protein AH
XLOC_000751	XLOC_000751	Scaffold_1:1089614-1090094	C	T	OK	141.42	175.288	0.309743	1.01454	Biotin carboxyl carrier protein of acetyl-CoA carboxylase
XLOC_000752	XLOC_000752	Scaffold_1:1090105-1091458	C	T	OK	320.527	339.639	0.083556	0.386729	Biotin carboxylase of acetyl-CoA carboxylase (EC 6.3.4.14);Ontology_term
XLOC_000753	XLOC_000753	Scaffold_1:1091478-1091889	C	T	OK	175.998	187.49	0.0912522	0.298891	Alkaline shock protein
XLOC_000754	XLOC_000754	Scaffold_1:1092180-1092570	C	T	OK	110.032	145.001	0.398137	1.21055	Transcription termination protein NusB
XLOC_000755	XLOC_000755	Scaffold_1:1092586-1093435	C	T	OK	524.981	491.058	-0.0963712	-0.436786	Methylenetetrahydrofolate dehydrogenase (NADP+) (EC 1.5.1.5) / Methenyltetrahydrofolate cyclohydrolase (EC 3.5.4.9);Ontology_term
XLOC_000756	XLOC_000756	Scaffold_1:1093517-1096000	C	T	OK	1097.05	1037.14	-0.0810194	-0.200122	Exodeoxyribonuclease VII large subunit (EC 3.1.11.6);Ontology_term
XLOC_000757	XLOC_000757	Scaffold_1:1096232-1098976	C	T	OK	929.679	874.722	-0.0879086	-0.379977	1-deoxy-D-xylulose 5-phosphate synthase (EC 2.2.1.7);Ontology_term
XLOC_000758	XLOC_000758	Scaffold_1:1099139-1099589	C	T	OK	539.743	528.63	-0.0300125	-0.113867	Arginine pathway regulatory protein ArgR%2C repressor of arg regulon
XLOC_000759	XLOC_000759	Scaffold_1:1099620-1101351	C	T	OK	291.635	272.217	-0.0994076	-0.460005	DNA repair protein RecN
XLOC_000760	XLOC_000760	Scaffold_1:1101532-1102816	C	T	OK	301.049	336.993	0.162719	0.736561	Stage IV sporulation protein B
XLOC_000761	XLOC_000761	Scaffold_1:1102877-1103048	C	T	OK	0	22.8054	inf	#NAME?	hypothetical protein
XLOC_000762	XLOC_000762	Scaffold_1:1103105-1103906	C	T	OK	368.058	359.015	-0.0358883	-0.155804	Stage 0 sporulation two-component response regulator (Spo0A)
XLOC_000763	XLOC_000763	Scaffold_1:1104661-1105231	C	T	OK	729.734	606.601	-0.266623	-1.12706	Serine O-acetyltransferase( EC:2.3.1.30 );Ontology_term
XLOC_000764	XLOC_000764	Scaffold_1:1105722-1106028	C	T	OK	238.046	219.14	-0.119384	-0.372952	FIG01235415: hypothetical protein
XLOC_000765	XLOC_000765	Scaffold_1:1106063-1106684	C	T	OK	279.676	316.87	0.18013	0.691563	N-acetylmuramoyl-L-alanine amidase (EC 3.5.1.28);Ontology_term
XLOC_000766	XLOC_000766	Scaffold_1:1106818-1107544	C	T	OK	244.596	288.952	0.240433	0.942046	Glycerophosphoryl diester phosphodiesterase (EC 3.1.4.46);Ontology_term
XLOC_000767	XLOC_000767	Scaffold_1:1108059-1110129	C	T	OK	320.079	357.655	0.160143	0.75852	Transcriptional regulator BkdR of isoleucine and valine catabolism operon
XLOC_000768	XLOC_000768	Scaffold_1:1110254-1111166	C	T	OK	342.682	350.398	0.0321208	0.139844	Phosphate butyryltransferase (EC 2.3.1.19);Ontology_term
XLOC_000769	XLOC_000769	Scaffold_1:1111169-1112264	C	T	OK	221.608	235.1	0.0852636	0.362678	Leucine dehydrogenase (EC 1.4.1.9);Ontology_term
XLOC_000770	XLOC_000770	Scaffold_1:1112302-1114820	C	T	OK	597.611	642.638	0.104798	0.487751	Butyrate kinase (EC 2.7.2.7);Ontology_term
XLOC_000771	XLOC_000771	Scaffold_1:1114842-1115835	C	T	OK	330.949	304.463	-0.12034	-0.525473	Branched-chain alpha-keto acid dehydrogenase%2C E1 component%2C alpha subunit (EC 1.2.4.4);Ontology_term
XLOC_000772	XLOC_000772	Scaffold_1:1115847-1116831	C	T	OK	341.038	338.655	-0.010115	-0.0454523	Branched-chain alpha-keto acid dehydrogenase%2C E1 component%2C beta subunit (EC 1.2.4.4);Ontology_term
XLOC_000773	XLOC_000773	Scaffold_1:1116854-1118135	C	T	OK	464.168	460.338	-0.011954	-0.0562146	Dihydrolipoamide acyltransferase component of branched-chain alpha-keto acid dehydrogenase complex (EC 2.3.1.168);Ontology_term
XLOC_000774	XLOC_000774	Scaffold_1:1119247-1119685	C	T	OK	306.335	295.115	-0.0538361	-0.189027	FIG01226417: hypothetical protein
XLOC_000775	XLOC_000775	Scaffold_1:1119913-1120681	C	T	OK	138.817	128.707	-0.109099	-0.380891	Amino acid ABC transporter%2C amino acid-binding protein
XLOC_000776	XLOC_000776	Scaffold_1:1120767-1122145	C	T	OK	482.484	511.138	0.083231	0.361924	ABC transporter membrane-spanning permease - glutamine transport
XLOC_000777	XLOC_000777	Scaffold_1:1122217-1123310	C	T	OK	348.699	364.934	0.0656503	0.283288	Integral membrane protein
XLOC_000778	XLOC_000778	Scaffold_1:1123510-1125040	C	T	OK	293.109	333.481	0.186165	0.8719	Acetyl-coenzyme A carboxyl transferase alpha chain (EC 6.4.1.2) / Acetyl-coenzyme A carboxyl transferase beta chain (EC 6.4.1.2)%3B Propionyl-CoA carboxylase beta chain (EC 6.4.1.3);Ontology_term
XLOC_000779	XLOC_000779	Scaffold_1:1125059-1126178	C	T	OK	219.555	213.904	-0.037617	-0.161051	Peptidase T (EC 3.4.11.4);Ontology_term
XLOC_000780	XLOC_000780	Scaffold_1:1127556-1128813	C	T	OK	278.526	250.242	-0.154492	-0.686259	DNA polymerase IV (EC 2.7.7.7);Ontology_term
XLOC_000781	XLOC_000781	Scaffold_1:1128899-1130309	C	T	OK	224.371	231.367	0.044296	0.192558	6-phosphogluconate dehydrogenase%2C decarboxylating (EC 1.1.1.44);Ontology_term
XLOC_000782	XLOC_000782	Scaffold_1:1130424-1131210	C	T	OK	292.571	310.115	0.0840175	0.354369	Glucose 1-dehydrogenase (EC 1.1.1.47);Ontology_term
XLOC_000783	XLOC_000783	Scaffold_1:1131349-1133011	C	T	OK	314.394	307.271	-0.0330623	-0.152677	Alkaline phosphatase (EC 3.1.3.1);Ontology_term
XLOC_000784	XLOC_000784	Scaffold_1:1133087-1133467	C	T	OK	204.942	341.289	0.73578	2.34109	PTS system%2C cellobiose-specific IIB component (EC 2.7.1.69);Ontology_term
XLOC_000785	XLOC_000785	Scaffold_1:1133472-1133805	C	T	OK	106.607	180.462	0.759393	2.03656	PTS system%2C cellobiose-specific IIA component (EC 2.7.1.69);Ontology_term
XLOC_000786	XLOC_000786	Scaffold_1:1133844-1135161	C	T	OK	346.167	361.666	0.0631879	0.291725	PTS system%2C cellobiose-specific IIC component (EC 2.7.1.69);Ontology_term
XLOC_000787	XLOC_000787	Scaffold_1:1135176-1136592	C	T	OK	306.454	338.47	0.143357	0.662821	Beta-glucosidase (EC 3.2.1.21);Ontology_term
XLOC_000788	XLOC_000788	Scaffold_1:1136711-1137425	C	T	OK	299.451	301.555	0.0101058	0.0393206	Transcriptional regulator%2C GntR family
XLOC_000789	XLOC_000789	Scaffold_1:1137670-1138660	C	T	OK	214.623	235.953	0.136689	0.553578	TRAP transporter solute receptor%2C unknown substrate 1
XLOC_000790	XLOC_000790	Scaffold_1:1138761-1141237	C	T	OK	811.835	786.626	-0.0455081	-0.141999	DUF1850 domain-containing protein
XLOC_000791	XLOC_000791	Scaffold_1:1142970-1143894	C	T	OK	264.623	280.29	0.08298	0.357861	Ribonuclease Z (EC 3.1.26.11);Ontology_term
XLOC_000792	XLOC_000792	Scaffold_1:1144011-1144161	C	T	OK	466.417	288.723	-0.691934	-0.812185	LSU ribosomal protein L33p @ LSU ribosomal protein L33p%2C zinc-independent
XLOC_000793	XLOC_000793	Scaffold_1:1146284-1147889	C	T	OK	479.944	443.456	-0.114074	-0.540675	Arginine utilization protein RocB
XLOC_000794	XLOC_000794	Scaffold_1:1148934-1149090	C	T	OK	211.341	138.94	-0.60511	-0.595348	hypothetical protein
XLOC_000795	XLOC_000795	Scaffold_1:1149126-1150119	C	T	OK	421.24	407.881	-0.0464939	-0.21432	Hydroxyacylglutathione hydrolase (EC 3.1.2.6);Ontology_term
XLOC_000796	XLOC_000796	Scaffold_1:1150128-1150911	C	T	OK	580.241	520.857	-0.155764	-0.704062	oxidoreductase%2C short-chain dehydrogenase/reductase family
XLOC_000797	XLOC_000797	Scaffold_1:1151065-1151230	C	T	OK	24.3026	57.5712	1.24424	0.619556	hypothetical protein
XLOC_000798	XLOC_000798	Scaffold_1:1151338-1152061	C	T	OK	381.202	320.475	-0.250345	-1.03144	phage-related protein
XLOC_000799	XLOC_000799	Scaffold_1:1152111-1152624	C	T	OK	121.431	136.565	0.169446	0.55081	hypothetical protein
XLOC_000800	XLOC_000800	Scaffold_1:1153083-1154349	C	T	OK	423.199	389.52	-0.11964	-0.55431	FIG01232241: hypothetical protein
XLOC_000801	XLOC_000801	Scaffold_1:1154395-1155100	C	T	OK	385.845	358.655	-0.105428	-0.436743	Putative thioesterase
XLOC_000802	XLOC_000802	Scaffold_1:1170336-1170726	C	T	OK	182.555	204.656	0.16487	0.54431	Siderophore biosynthesis non-ribosomal peptide synthetase modules
XLOC_000803	XLOC_000803	Scaffold_1:1170851-1178660	C	T	OK	356.175	340.282	-0.0658558	-0.321496	Bacitracin synthetase 3 (BA3) [Includes: ATP-dependent isoleucine adenylase (IleA) (Isoleucine activase)%3B ATP-dependent D-phenylalanine adenylase (D-PheA) (D-phenylalanine activase)%3B ATP-dependent histidine adenylase (HisA) (Histidine activase)%3B ATP-dependent D-aspartate adenylase (D-AspA) (D-aspartate activase)%3B ATP-dependent asparagine adenylase (AsnA) (Asparagine activase)%3B Aspartate…
XLOC_000804	XLOC_000804	Scaffold_1:1181614-1197838	C	T	OK	370.631	357.383	-0.0525115	-0.364001	Bacitracin synthetase 3 (BA3) [Includes: ATP-dependent isoleucine adenylase (IleA) (Isoleucine activase)%3B ATP-dependent D-phenylalanine adenylase (D-PheA) (D-phenylalanine activase)%3B ATP-dependent histidine adenylase (HisA) (Histidine activase)%3B ATP-dependent D-aspartate adenylase (D-AspA) (D-aspartate activase)%3B ATP-dependent asparagine adenylase (AsnA) (Asparagine activase)%3B Aspartate…
XLOC_000805	XLOC_000805	Scaffold_1:1197871-1197991	C	T	NOTEST	0	0	0	0	hypothetical protein
XLOC_000806	XLOC_000806	Scaffold_1:1197996-1199734	C	T	OK	523.626	579.581	0.146473	0.640805	DNA-binding response regulator
XLOC_000807	XLOC_000807	Scaffold_1:1199849-1200734	C	T	OK	357.23	308.242	-0.21279	-0.903255	bacitracin ABC transporter%2C ATP-binding protein%2C putative
XLOC_000808	XLOC_000808	Scaffold_1:1200774-1201461	C	T	OK	527.318	501.977	-0.0710529	-0.301035	bacitracin ABC transporter%2C permease protein%2C putative
XLOC_000809	XLOC_000809	Scaffold_1:1201582-1202194	C	T	OK	281.218	269.855	-0.0595038	-0.215201	bacitracin transport permease protein bcrc
XLOC_000810	XLOC_000810	Scaffold_1:1202673-1203162	C	T	OK	366.795	349.062	-0.0714936	-0.261213	FIG01240679: hypothetical protein
XLOC_000811	XLOC_000811	Scaffold_1:1203277-1204883	C	T	OK	703.118	770.922	0.132818	0.576576	Lantibiotic transport ATP-binding protein srtF
XLOC_000812	XLOC_000812	Scaffold_1:1204967-1206086	C	T	OK	294.886	307.344	0.0596968	0.265406	Pantothenate kinase (EC 2.7.1.33);Ontology_term
XLOC_000813	XLOC_000813	Scaffold_1:1206100-1206484	C	T	OK	468.81	453.982	-0.0463674	-0.167684	Possible glyoxylase family protein (Lactoylglutathione lyase) (EC 4.4.1.5);Ontology_term
XLOC_000814	XLOC_000814	Scaffold_1:1208346-1209609	C	T	OK	335.829	328.753	-0.0307239	-0.141977	Error-prone%2C lesion bypass DNA polymerase V (UmuC)
XLOC_000815	XLOC_000815	Scaffold_1:1209624-1209963	C	T	OK	75.1951	87.024	0.210775	0.539001	YolD
XLOC_000816	XLOC_000816	Scaffold_1:1210174-1210816	C	T	OK	235.633	226.173	-0.059118	-0.213511	Fibronectin-binding protein
XLOC_000817	XLOC_000817	Scaffold_1:1217400-1217613	C	T	OK	110.827	108.233	-0.0341597	-0.0551184	hypothetical protein
XLOC_000818	XLOC_000818	Scaffold_1:1218449-1218650	C	T	OK	19.9314	51.1644	1.3601	1.15545	hypothetical protein
XLOC_000819	XLOC_000819	Scaffold_1:1218763-1218883	C	T	NOTEST	0	0	0	0	hypothetical protein
XLOC_000820	XLOC_000820	Scaffold_1:1218951-1220288	C	T	OK	551.579	592.457	0.103143	0.326599	FIG01233582: hypothetical protein
XLOC_000821	XLOC_000821	Scaffold_1:1220609-1221186	C	T	OK	286.933	307.17	0.0983252	0.359123	hypothetical protein
XLOC_000822	XLOC_000822	Scaffold_1:1222141-1222528	C	T	OK	196.817	198.512	0.0123727	0.000799271	hypothetical protein
XLOC_000823	XLOC_000823	Scaffold_1:1224806-1226533	C	T	OK	1034.6	1012.77	-0.0307719	-0.124869	ADP-ribose pyrophosphatase (EC 3.6.1.13);Ontology_term
XLOC_000824	XLOC_000824	Scaffold_1:1226541-1227006	C	T	OK	353.078	381.097	0.110171	0.415289	ElaA protein
XLOC_000825	XLOC_000825	Scaffold_1:1230273-1232707	C	T	OK	768.962	631.973	-0.283048	-1.26572	PTS system%2C cellobiose-specific IIB component (EC 2.7.1.69);Ontology_term
XLOC_000826	XLOC_000826	Scaffold_1:1230273-1232707	C	T	OK	321.645	289.715	-0.150834	-0.231751	PTS system%2C cellobiose-specific IIB component (EC 2.7.1.69);Ontology_term
XLOC_000827	XLOC_000827	Scaffold_1:1232825-1233275	C	T	OK	203.373	140.054	-0.538142	-1.76147	Ferric uptake regulation protein FUR
XLOC_000828	XLOC_000828	Scaffold_1:1233395-1233620	C	T	OK	121.287	113.287	-0.0984482	-0.190841	FIG01226426: hypothetical protein
XLOC_000829	XLOC_000829	Scaffold_1:1233626-1234517	C	T	OK	286.055	282.679	-0.0171258	-0.0712435	Site-specific recombinase XerD
XLOC_000830	XLOC_000830	Scaffold_1:1234710-1235895	C	T	OK	337.519	308.317	-0.130555	-0.58554	Phosphopentomutase (EC 5.4.2.7);Ontology_term
XLOC_000831	XLOC_000831	Scaffold_1:1235906-1236722	C	T	OK	472.823	399.745	-0.242223	-1.06735	Purine nucleoside phosphorylase (EC 2.4.2.1)%3B N-Ribosylnicotinamide phosphorylase (EC 2.4.2.1);Ontology_term
XLOC_000832	XLOC_000832	Scaffold_1:1236879-1238052	C	T	OK	289.506	295.031	0.0272709	0.118557	D-alanyl-D-alanine carboxypeptidase (EC 3.4.16.4);Ontology_term
XLOC_000833	XLOC_000833	Scaffold_1:1238145-1238936	C	T	OK	594.861	573.204	-0.0535051	-0.189798	Anti-sigma F factor antagonist (spoIIAA-2)%3B Anti-sigma B factor antagonist RsbV
XLOC_000834	XLOC_000834	Scaffold_1:1238948-1239716	C	T	OK	213.058	249.261	0.226412	0.875022	RNA polymerase sporulation specific sigma factor SigF
XLOC_000835	XLOC_000835	Scaffold_1:1239869-1240905	C	T	OK	395.654	403.145	0.027059	0.104435	Stage V sporulation protein AA (SpoVAA)
XLOC_000836	XLOC_000836	Scaffold_1:1240918-1241368	C	T	OK	160.491	158.174	-0.0209809	-0.0678282	Stage V sporulation protein AC (SpoVAC)
XLOC_000837	XLOC_000837	Scaffold_1:1241380-1242400	C	T	OK	399.829	375.692	-0.0898348	-0.404173	Stage V sporulation protein AD (SpoVAD)
XLOC_000838	XLOC_000838	Scaffold_1:1242401-1242752	C	T	OK	673.796	604.263	-0.157134	-0.563208	Stage V sporulation protein AE (SpoVAE)
XLOC_000839	XLOC_000839	Scaffold_1:1242758-1244793	C	T	OK	801.753	740.159	-0.115322	-0.469571	Stage V sporulation protein AE (SpoVAE)
XLOC_000840	XLOC_000840	Scaffold_1:1245532-1246852	C	T	OK	355.676	364.192	0.034135	0.158344	Diaminopimelate decarboxylase (EC 4.1.1.20);Ontology_term
XLOC_000841	XLOC_000841	Scaffold_1:1247213-1249094	C	T	OK	279.947	244.36	-0.196148	-0.581837	YndL
XLOC_000842	XLOC_000842	Scaffold_1:1247213-1249094	C	T	NOTEST	0	0	0	0	YndL
XLOC_000843	XLOC_000843	Scaffold_1:1249202-1249640	C	T	OK	322.049	302.452	-0.0905729	-0.322892	Peptidyl-prolyl cis-trans isomerase (EC 5.2.1.8);Ontology_term
XLOC_000844	XLOC_000844	Scaffold_1:1249869-1251259	C	T	OK	697.074	607.597	-0.198198	-0.391945	response regulator aspartate phosphatase
XLOC_000845	XLOC_000845	Scaffold_1:1251475-1253665	C	T	OK	354.941	322.519	-0.138193	-0.654871	FIG01242870: hypothetical protein
XLOC_000846	XLOC_000846	Scaffold_1:1253929-1254274	C	T	OK	91.9889	90.4128	-0.0249322	-0.0668897	unknown
XLOC_000847	XLOC_000847	Scaffold_1:1254393-1254525	C	T	OK	195.193	204.397	0.0664748	0.0269169	hypothetical protein
XLOC_000848	XLOC_000848	Scaffold_1:1254635-1255724	C	T	OK	351.173	310.483	-0.177667	-0.801483	Diaminohydroxyphosphoribosylaminopyrimidine deaminase (EC 3.5.4.26) / 5-amino-6-(5-phosphoribosylamino)uracil reductase (EC 1.1.1.193);Ontology_term
XLOC_000849	XLOC_000849	Scaffold_1:1255735-1256383	C	T	OK	308.623	290.918	-0.0852325	-0.333304	Riboflavin synthase eubacterial/eukaryotic (EC 2.5.1.9);Ontology_term
XLOC_000850	XLOC_000850	Scaffold_1:1256404-1257601	C	T	OK	267.317	264.177	-0.0170452	-0.0754905	3%2C4-dihydroxy-2-butanone 4-phosphate synthase (EC 4.1.99.12) / GTP cyclohydrolase II (EC 3.5.4.25);Ontology_term
XLOC_000851	XLOC_000851	Scaffold_1:1257635-1258100	C	T	OK	239.256	221.667	-0.110162	-0.380865	6%2C7-dimethyl-8-ribityllumazine synthase (EC 2.5.1.78);Ontology_term
XLOC_000852	XLOC_000852	Scaffold_1:1258201-1258576	C	T	OK	602.731	579.061	-0.0577994	-0.213985	RibT protein
XLOC_000853	XLOC_000853	Scaffold_1:1259505-1260844	C	T	OK	426.176	467.908	0.134774	0.554261	Segregation and condensation protein A
XLOC_000854	XLOC_000854	Scaffold_1:1260958-1261450	C	T	OK	212.123	210.581	-0.0105243	-0.0363335	FIG01226807: hypothetical protein
XLOC_000855	XLOC_000855	Scaffold_1:1261602-1263332	C	T	OK	692.271	726.501	0.0696264	0.297018	D-alanyl-D-alanine carboxypeptidase (EC 3.4.16.4);Ontology_term
XLOC_000856	XLOC_000856	Scaffold_1:1263336-1263873	C	T	OK	323.267	340.06	0.0730644	0.270486	Spore maturation protein B
XLOC_000857	XLOC_000857	Scaffold_1:1264032-1264767	C	T	OK	183.141	192.05	0.0685283	0.256213	Ribosomal large subunit pseudouridine synthase B (EC 4.2.1.70);Ontology_term
XLOC_000858	XLOC_000858	Scaffold_1:1264854-1267028	C	T	OK	696.19	698.35	0.00446932	0.0168451	Cytochrome c-type biogenesis protein ResA
XLOC_000859	XLOC_000859	Scaffold_1:1267040-1268329	C	T	OK	434.402	400.594	-0.116888	-0.536091	Cytochrome c-type biogenesis protein CcsA/ResC
XLOC_000860	XLOC_000860	Scaffold_1:1268360-1270861	C	T	OK	839.773	869.562	0.0502888	0.209418	DNA-binding response regulator ResD
XLOC_000861	XLOC_000861	Scaffold_1:1271281-1271983	C	T	OK	293.749	284.219	-0.0475813	-0.186119	Alkaline phosphatase synthesis transcriptional regulatory protein PhoP
XLOC_000862	XLOC_000862	Scaffold_1:1271986-1274568	C	T	OK	649.662	634.815	-0.0333535	-0.155183	Phosphate regulon sensor protein PhoR (SphS) (EC 2.7.13.3);Ontology_term
XLOC_000863	XLOC_000863	Scaffold_1:1274938-1275709	C	T	OK	186.566	160.183	-0.219972	-0.808912	Peptidoglycan N-acetylglucosamine deacetylase (EC 3.5.1.-);Ontology_term
XLOC_000864	XLOC_000864	Scaffold_1:1275743-1276658	C	T	OK	314.744	320.683	0.0269651	0.111801	Cell envelope-associated transcriptional attenuator LytR-CpsA-Psr%2C subfamily F2 (as in PMID19099556)
XLOC_000865	XLOC_000865	Scaffold_1:1276930-1277515	C	T	OK	183.479	182.07	-0.0111243	-0.0385837	RNA polymerase sigma factor SigX
XLOC_000866	XLOC_000866	Scaffold_1:1277630-1278557	C	T	OK	450.708	440.83	-0.0319727	-0.140805	Sigma-X negative effector
XLOC_000867	XLOC_000867	Scaffold_1:1278680-1279505	C	T	OK	761.512	723.415	-0.0740432	-0.344458	Cell wall endopeptidase%2C family M23/M37
XLOC_000868	XLOC_000868	Scaffold_1:1281673-1282255	C	T	OK	278.093	230.781	-0.269046	-0.979303	Substrate-specific component RibU of riboflavin ECF transporter
XLOC_000869	XLOC_000869	Scaffold_1:1282905-1286091	C	T	OK	988.883	943.169	-0.0682823	-0.278184	FIG00743178: hypothetical protein
XLOC_000870	XLOC_000870	Scaffold_1:1286092-1286821	C	T	OK	631.014	588.195	-0.101377	-0.440127	FIG01227733: hypothetical protein
XLOC_000871	XLOC_000871	Scaffold_1:1286888-1287332	C	T	OK	315.337	337.291	0.0971032	0.341072	FIG01232489: hypothetical protein
XLOC_000872	XLOC_000872	Scaffold_1:1287412-1288198	C	T	OK	701.109	610.639	-0.199319	-0.919461	Phosphoesterase
XLOC_000873	XLOC_000873	Scaffold_1:1288351-1288936	C	T	OK	306.95	234.056	-0.391149	-1.40487	Negative regulator of genetic competence MecA
XLOC_000874	XLOC_000874	Scaffold_1:1289131-1290406	C	T	OK	345.339	378.235	0.13127	0.608161	NAD-specific glutamate dehydrogenase (EC 1.4.1.2);Ontology_term
XLOC_000875	XLOC_000875	Scaffold_1:1290465-1291461	C	T	OK	446.746	435.55	-0.0366185	-0.164441	Thioredoxin reductase (EC 1.8.1.9);Ontology_term
XLOC_000876	XLOC_000876	Scaffold_1:1291569-1292538	C	T	OK	301.35	284.153	-0.0847717	-0.365567	L-asparaginase (EC 3.5.1.1);Ontology_term
XLOC_000877	XLOC_000877	Scaffold_1:1292617-1293286	C	T	OK	375.819	348.55	-0.108673	-0.426746	FIG00895122: hypothetical protein
XLOC_000878	XLOC_000878	Scaffold_1:1293423-1294389	C	T	OK	491.002	505.765	0.0427392	0.195261	Spore cortex-lytic enzyme%2C lytic transglycosylase SleB
XLOC_000879	XLOC_000879	Scaffold_1:1294405-1295758	C	T	OK	265.494	289.131	0.123041	0.539245	Spore germination protein YpeB
XLOC_000880	XLOC_000880	Scaffold_1:1295920-1296097	C	T	OK	357.672	351.063	-0.0269095	-0.0466773	alternate gene name: jofB
XLOC_000881	XLOC_000881	Scaffold_1:1296177-1296858	C	T	OK	327.591	303.702	-0.10924	-0.440829	Cytidylate kinase (EC 2.7.4.25);Ontology_term
XLOC_000882	XLOC_000882	Scaffold_1:1297075-1298224	C	T	OK	290.015	297.284	0.0357161	0.158086	SSU ribosomal protein S1p
XLOC_000883	XLOC_000883	Scaffold_1:1298236-1299289	C	T	OK	223.663	241.179	0.108781	0.468123	Isopentenyl-diphosphate delta-isomerase%2C FMN-dependent (EC 5.3.3.2);Ontology_term
XLOC_000884	XLOC_000884	Scaffold_1:1299522-1301212	C	T	OK	791.911	801.697	0.0177185	0.0318079	membrane protein%2C putative
XLOC_000885	XLOC_000885	Scaffold_1:1301373-1302684	C	T	OK	293.273	296.575	0.0161532	0.0729196	GTP-binding protein EngA
XLOC_000886	XLOC_000886	Scaffold_1:1302699-1303740	C	T	OK	308.225	322.457	0.0651235	0.294666	Glycerol-3-phosphate dehydrogenase [NAD(P)+] (EC 1.1.1.94);Ontology_term
XLOC_000887	XLOC_000887	Scaffold_1:1304065-1304269	C	T	OK	598.143	651.421	0.123099	0.330479	FIG01226975: hypothetical protein
XLOC_000888	XLOC_000888	Scaffold_1:1304291-1305008	C	T	OK	428.611	421.614	-0.0237453	-0.101533	ABC transporter periplasmic binding protein yphF
XLOC_000889	XLOC_000889	Scaffold_1:1305209-1306688	C	T	OK	462.916	442.849	-0.0639346	-0.301035	Stage IV sporulation protein A
XLOC_000890	XLOC_000890	Scaffold_1:1307105-1307384	C	T	OK	60.7636	80.8135	0.411389	0.789702	DNA-binding protein HBsu
XLOC_000891	XLOC_000891	Scaffold_1:1307593-1308163	C	T	OK	137.03	204.666	0.578777	2.03155	GTP cyclohydrolase I (EC 3.5.4.16) type 1;Ontology_term
XLOC_000892	XLOC_000892	Scaffold_1:1308184-1308421	C	T	OK	243.541	215.99	-0.173202	-0.413863	transcription attenuation protein MtrB
XLOC_000893	XLOC_000893	Scaffold_1:1308564-1309341	C	T	OK	268.02	234.714	-0.191436	-0.743371	Heptaprenyl diphosphate synthase component I (EC 2.5.1.30);Ontology_term
XLOC_000894	XLOC_000894	Scaffold_1:1309343-1310042	C	T	OK	367.451	343.234	-0.098359	-0.410993	2-heptaprenyl-1%2C4-naphthoquinone methyltransferase MenG (EC 2.1.1.163);Ontology_term
XLOC_000895	XLOC_000895	Scaffold_1:1310071-1311034	C	T	OK	324.794	325.9	0.00490093	0.0209868	Heptaprenyl diphosphate synthase component II (EC 2.5.1.30);Ontology_term
XLOC_000896	XLOC_000896	Scaffold_1:1311158-1311605	C	T	OK	279.764	285.395	0.028748	0.100301	Nucleoside diphosphate kinase (EC 2.7.4.6);Ontology_term
XLOC_000897	XLOC_000897	Scaffold_1:1311745-1312513	C	T	OK	157.034	136.959	-0.197328	-0.713879	Chemotaxis protein methyltransferase CheR (EC 2.1.1.80);Ontology_term
XLOC_000898	XLOC_000898	Scaffold_1:1312584-1315225	C	T	OK	1004.56	976.657	-0.0406345	-0.139091	Chorismate synthase (EC 4.2.3.5);Ontology_term
XLOC_000899	XLOC_000899	Scaffold_1:1315472-1321394	C	T	OK	1751.36	1700.15	-0.0428174	-0.182432	Anthranilate synthase%2C aminase component (EC 4.1.3.27);Ontology_term
XLOC_000900	XLOC_000900	Scaffold_1:1321403-1322489	C	T	OK	267.037	262.834	-0.0228908	-0.0980099	Biosynthetic Aromatic amino acid aminotransferase beta (EC 2.6.1.57) @ Histidinol-phosphate aminotransferase (EC 2.6.1.9);Ontology_term
XLOC_000901	XLOC_000901	Scaffold_1:1322543-1323659	C	T	OK	215.804	233.764	0.115328	0.483968	Prephenate dehydrogenase (EC 1.3.1.12);Ontology_term
XLOC_000902	XLOC_000902	Scaffold_1:1323669-1324956	C	T	OK	273.738	320.421	0.227169	1.03806	5-Enolpyruvylshikimate-3-phosphate synthase (EC 2.5.1.19);Ontology_term
XLOC_000903	XLOC_000903	Scaffold_1:1324960-1325107	C	T	OK	62.1929	136.646	1.13563	0.565474	hypothetical protein
XLOC_000904	XLOC_000904	Scaffold_1:1325188-1326463	C	T	OK	304.305	333.756	0.133274	0.597741	TPR-repeat-containing protein%2C putative component of Menaquinone-cytochrome C reductase
XLOC_000905	XLOC_000905	Scaffold_1:1326531-1327071	C	T	OK	283.613	317.079	0.160916	0.580225	FIG003190: hypothetical protein co-occurring with TPR domain protein
XLOC_000906	XLOC_000906	Scaffold_1:1327153-1327600	C	T	OK	151.752	171.692	0.178107	0.590411	FIG013069: hypothetical protein co-occurring with TPR domain protein
XLOC_000907	XLOC_000907	Scaffold_1:1327746-1328253	C	T	OK	332.532	377.74	0.183903	0.693972	Menaquinone-cytochrome C reductase iron-sulfur subunit
XLOC_000908	XLOC_000908	Scaffold_1:1328255-1328930	C	T	OK	409.604	392.8	-0.0604356	-0.251199	Menaquinone-cytochrome c reductase%2C cytochrome B subunit
XLOC_000909	XLOC_000909	Scaffold_1:1328962-1329730	C	T	OK	212.807	252.069	0.244275	0.979413	Menaquinone-cytochrome C oxidoreductase%2C cytochrome C subunit
XLOC_000910	XLOC_000910	Scaffold_1:1329765-1329915	C	T	OK	36.8549	0	#NAME?	#NAME?	hypothetical protein
XLOC_000911	XLOC_000911	Scaffold_1:1329958-1330552	C	T	OK	483	516.396	0.0964554	0.386317	Hypothetical transmembrane protein CDS_ID OB1773
XLOC_000912	XLOC_000912	Scaffold_1:1330626-1331427	C	T	OK	242.013	278.202	0.201045	0.813233	FIG01227150: hypothetical protein
XLOC_000913	XLOC_000913	Scaffold_1:1332481-1332820	C	T	OK	47.7949	47.1684	-0.0190359	-0.0450166	MazG nucleotide pyrophosphohydrolase
XLOC_000914	XLOC_000914	Scaffold_1:1332832-1333636	C	T	OK	186.627	205.248	0.137209	0.517076	4-hydroxy-tetrahydrodipicolinate reductase (EC 1.17.1.8);Ontology_term
XLOC_000915	XLOC_000915	Scaffold_1:1333655-1338065	C	T	OK	1134.33	1311.43	0.209304	0.749742	Methylglyoxal synthase (EC 4.2.3.3);Ontology_term
XLOC_000916	XLOC_000916	Scaffold_1:1338313-1339147	C	T	OK	328.549	371.995	0.179174	0.769272	3-methyl-2-oxobutanoate hydroxymethyltransferase (EC 2.1.2.11);Ontology_term
XLOC_000917	XLOC_000917	Scaffold_1:1339149-1340399	C	T	OK	514.869	584.822	0.183793	0.626452	Pantoate--beta-alanine ligase (EC 6.3.2.1);Ontology_term
XLOC_000918	XLOC_000918	Scaffold_1:1340522-1343315	C	T	OK	289.917	302.305	0.0603666	0.287267	DinG family ATP-dependent helicase YoaA
XLOC_000919	XLOC_000919	Scaffold_1:1343467-1343638	C	T	OK	107.549	174.034	0.69437	0.73505	FIG01226635: hypothetical protein
XLOC_000920	XLOC_000920	Scaffold_1:1343647-1344133	C	T	OK	426.747	407.168	-0.067756	-0.250855	FIG01226722: hypothetical protein
XLOC_000921	XLOC_000921	Scaffold_1:1344154-1345339	C	T	OK	305.404	318.494	0.0605451	0.268809	Aspartate aminotransferase (EC 2.6.1.1);Ontology_term
XLOC_000922	XLOC_000922	Scaffold_1:1345487-1346780	C	T	OK	253.355	300.134	0.244444	1.07354	Asparaginyl-tRNA synthetase (EC 6.1.1.22);Ontology_term
XLOC_000923	XLOC_000923	Scaffold_1:1346854-1347553	C	T	OK	171.115	190.799	0.157092	0.560379	Chromosome replication initiation protein DnaD
XLOC_000924	XLOC_000924	Scaffold_1:1347569-1348732	C	T	OK	519.516	536.083	0.0452875	0.185644	Endonuclease III (EC 4.2.99.18);Ontology_term
XLOC_000925	XLOC_000925	Scaffold_1:1352129-1353089	C	T	OK	161.36	184.821	0.195845	0.735576	Uncharacterized protein YppC
XLOC_000926	XLOC_000926	Scaffold_1:1353294-1353651	C	T	OK	259.908	234.142	-0.150617	-0.516102	Uncharacterized protein yppD
XLOC_000927	XLOC_000927	Scaffold_1:1353708-1354080	C	T	OK	64.6537	58.8871	-0.13478	-0.366257	FIG01226164: hypothetical protein
XLOC_000928	XLOC_000928	Scaffold_1:1354482-1354929	C	T	OK	955.089	909.931	-0.0698777	-0.281479	Spore coat protein
XLOC_000929	XLOC_000929	Scaffold_1:1355539-1356046	C	T	OK	328.113	299.575	-0.131275	-0.477397	PTS system%2C glucose-specific IIA component (EC 2.7.1.69);Ontology_term
XLOC_000930	XLOC_000930	Scaffold_1:1356151-1358422	C	T	OK	294.107	290.442	-0.0180919	-0.08559	ATP-dependent RNA helicase
XLOC_000931	XLOC_000931	Scaffold_1:1358427-1359741	C	T	OK	390.468	367.763	-0.0864301	-0.400644	Predicted exonuclease
XLOC_000932	XLOC_000932	Scaffold_1:1359982-1360252	C	T	OK	184.014	331.684	0.849993	2.2441	Inner spore coat protein D
XLOC_000933	XLOC_000933	Scaffold_1:1360368-1360920	C	T	OK	171.776	204.158	0.249154	0.883023	FIG005686: hypothetical protein
XLOC_000934	XLOC_000934	Scaffold_1:1361000-1361297	C	T	OK	198.971	169.169	-0.234095	-0.659465	Cell division protein GpsB%2C coordinates the switch between cylindrical and septal cell wall synthesis by re-localization of PBP1
XLOC_000935	XLOC_000935	Scaffold_1:1361831-1363492	C	T	OK	392.623	447.692	0.189361	0.116447	FIG001721: Predicted N6-adenine-specific DNA methylase
XLOC_000936	XLOC_000936	Scaffold_1:1364024-1364387	C	T	OK	46.2123	59.8947	0.374153	0.854032	FIG01241489: hypothetical protein
XLOC_000937	XLOC_000937	Scaffold_1:1364583-1364760	C	T	OK	143.84	52.7898	-1.44613	-1.33439	YptA
XLOC_000938	XLOC_000938	Scaffold_1:1364868-1366788	C	T	OK	322.816	320.175	-0.011851	-0.0552042	DinG family ATP-dependent helicase YpvA
XLOC_000939	XLOC_000939	Scaffold_1:1366900-1368406	C	T	OK	365.378	380.591	0.0588516	0.274023	Thermostable carboxypeptidase 1 (EC 3.4.17.19);Ontology_term
XLOC_000940	XLOC_000940	Scaffold_1:1368615-1370732	C	T	OK	1041.61	722.184	-0.528377	-0.327014	hypothetical protein
XLOC_000941	XLOC_000941	Scaffold_1:1370735-1371287	C	T	OK	397.284	406.323	0.0324568	0.129518	acetyltransferase%2C GNAT family
XLOC_000942	XLOC_000942	Scaffold_1:1371328-1372426	C	T	OK	259.358	261.973	0.0144748	0.0619372	Chalcone synthase (EC 2.3.1.74);Ontology_term
XLOC_000943	XLOC_000943	Scaffold_1:1372433-1372937	C	T	OK	328.061	302.722	-0.115972	-0.423964	Alkylpyrone O-methyltransferase (B. subtilis BpsB)
XLOC_000944	XLOC_000944	Scaffold_1:1373239-1376803	C	T	OK	263.124	259.855	-0.0180331	-0.0860717	Uncharacterized protein Bsub YpbR
XLOC_000945	XLOC_000945	Scaffold_1:1376874-1377147	C	T	OK	328.344	361.813	0.140034	0.405972	FIG00675519: hypothetical protein
XLOC_000946	XLOC_000946	Scaffold_1:1377226-1377376	C	T	OK	290.305	330.703	0.187966	0.189882	hypothetical protein
XLOC_000947	XLOC_000947	Scaffold_1:1377460-1378348	C	T	OK	420.905	387.089	-0.120828	-0.536439	DNA polymerase I (EC 2.7.7.7);Ontology_term
XLOC_000948	XLOC_000948	Scaffold_1:1379711-1380371	C	T	OK	707.381	697.835	-0.0195999	-0.0878099	Uncharacterized protein YpeP
XLOC_000949	XLOC_000949	Scaffold_1:1380385-1380571	C	T	OK	95.2039	162.774	0.773774	1.08185	unknown
XLOC_000950	XLOC_000950	Scaffold_1:1381057-1381240	C	T	OK	286.252	312.591	0.12699	0.22415	activation of degradative enzymes (aprE%2C nprE%2C sacB)
XLOC_000951	XLOC_000951	Scaffold_1:1381593-1381722	C	T	OK	0	584.535	inf	#NAME?	hypothetical protein
XLOC_000952	XLOC_000952	Scaffold_1:1381779-1382469	C	T	OK	301.092	289.534	-0.0564697	-0.23377	DUF124 domain-containing protein
XLOC_000953	XLOC_000953	Scaffold_1:1384997-1386683	C	T	OK	351.15	347.516	-0.0150077	-0.0706075	Formate--tetrahydrofolate ligase (EC 6.3.4.3);Ontology_term
XLOC_000954	XLOC_000954	Scaffold_1:1386698-1387831	C	T	OK	753.263	764.234	0.0208603	0.0871123	Glutathione peroxidase family protein
XLOC_000955	XLOC_000955	Scaffold_1:1387866-1389003	C	T	OK	220.566	233.517	0.0823216	0.347425	PBS lyase HEAT-like repeat domain protein
XLOC_000956	XLOC_000956	Scaffold_1:1389346-1391023	C	T	OK	353.941	357.88	0.015967	0.0752158	Dihydroxy-acid dehydratase (EC 4.2.1.9);Ontology_term
XLOC_000957	XLOC_000957	Scaffold_1:1391111-1391546	C	T	OK	306.088	311.616	0.0258218	0.0909505	FIG01226173: hypothetical protein
XLOC_000958	XLOC_000958	Scaffold_1:1391582-1392353	C	T	OK	270.455	278.735	0.0435027	0.179156	Protein-L-isoD(D-D) O-methyltransferase
XLOC_000959	XLOC_000959	Scaffold_1:1392625-1393228	C	T	OK	535.045	516.01	-0.0522622	-0.223981	FIG01231694: hypothetical protein
XLOC_000960	XLOC_000960	Scaffold_1:1393243-1393783	C	T	OK	383.502	395.392	0.0440483	0.169024	Low temperature requirement C protein
XLOC_000961	XLOC_000961	Scaffold_1:1393821-1394073	C	T	OK	179.105	444.076	1.31	3.43337	hypothetical protein
XLOC_000962	XLOC_000962	Scaffold_1:1394140-1394629	C	T	OK	256.7	281.083	0.130913	0.465583	Dihydrofolate reductase (EC 1.5.1.3);Ontology_term
XLOC_000963	XLOC_000963	Scaffold_1:1394643-1395267	C	T	OK	393.906	378.065	-0.059217	-0.236107	unknown
XLOC_000964	XLOC_000964	Scaffold_1:1397198-1398467	C	T	OK	219.634	232.397	0.0814868	0.351498	Threonine dehydratase biosynthetic (EC 4.3.1.19);Ontology_term
XLOC_000965	XLOC_000965	Scaffold_1:1398604-1398811	C	T	OK	23.5208	34.6858	0.560411	0.668051	unknown
XLOC_000966	XLOC_000966	Scaffold_1:1398961-1400403	C	T	OK	609.857	594.036	-0.0379191	-0.166239	Hypothetical protein DUF194%2C DegV family
XLOC_000967	XLOC_000967	Scaffold_1:1400569-1401295	C	T	OK	243.445	262.796	0.110345	0.429483	FIG006988: Lipase/Acylhydrolase with GDSL-like motif
XLOC_000968	XLOC_000968	Scaffold_1:1401304-1401877	C	T	OK	216.408	197.804	-0.129681	-0.463096	YfaA
XLOC_000969	XLOC_000969	Scaffold_1:1401908-1402109	C	T	OK	346.665	214.543	-0.692273	-1.26044	unknown
XLOC_000970	XLOC_000970	Scaffold_1:1403005-1404337	C	T	OK	420.172	385.388	-0.124669	-0.57895	Na+ driven multidrug efflux pump
XLOC_000971	XLOC_000971	Scaffold_1:1404472-1405560	C	T	OK	1314.24	1138.73	-0.206799	-0.75755	diguanylate cyclase (GGDEF domain)
XLOC_000972	XLOC_000972	Scaffold_1:1406724-1407697	C	T	OK	533.223	571.814	0.100807	0.398404	Peptide methionine sulfoxide reductase MsrA (EC 1.8.4.11);Ontology_term
XLOC_000973	XLOC_000973	Scaffold_1:1407949-1408813	C	T	OK	206.045	188.541	-0.128083	-0.489113	CgeE
XLOC_000974	XLOC_000974	Scaffold_1:1408893-1409022	C	T	OK	1676.35	296.082	-2.50126	-1.29229	hypothetical protein
XLOC_000975	XLOC_000975	Scaffold_1:1409022-1415370	C	T	OK	734.105	705.933	-0.0564559	-0.172128	FIG01240677: hypothetical protein
XLOC_000976	XLOC_000976	Scaffold_1:1415468-1417464	C	T	OK	655.035	606.556	-0.110931	-0.226785	Lysine 2%2C3-aminomutase (EC 5.4.3.2);Ontology_term
XLOC_000977	XLOC_000977	Scaffold_1:1415468-1417464	C	T	OK	52.1207	111.574	1.09808	0.210079	Lysine 2%2C3-aminomutase (EC 5.4.3.2);Ontology_term
XLOC_000978	XLOC_000978	Scaffold_1:1417629-1418437	C	T	OK	211.301	202.779	-0.0593886	-0.226388	IG hypothetical 18022
XLOC_000979	XLOC_000979	Scaffold_1:1418559-1418730	C	T	OK	135.389	23.9423	-2.49948	-1.30736	FIG01227129: hypothetical protein
XLOC_000980	XLOC_000980	Scaffold_1:1418800-1419451	C	T	OK	341.772	313.931	-0.122587	-0.473604	PAP2 family protein
XLOC_000981	XLOC_000981	Scaffold_1:1419505-1419826	C	T	OK	78.3445	86.6168	0.144814	0.359412	unknown
XLOC_000982	XLOC_000982	Scaffold_1:1422170-1422869	C	T	OK	345.169	295.44	-0.224441	-0.914675	Purine nucleoside phosphorylase (EC 2.4.2.1);Ontology_term
XLOC_000983	XLOC_000983	Scaffold_1:1422902-1423724	C	T	OK	517.874	458.092	-0.176964	-0.77825	D-alanyl-D-alanine carboxypeptidase (EC 3.4.16.4);Ontology_term
XLOC_000984	XLOC_000984	Scaffold_1:1424978-1426376	C	T	OK	426.898	424.585	-0.00783506	-0.0363759	Carboxyl-terminal protease (EC 3.4.21.102);Ontology_term
XLOC_000985	XLOC_000985	Scaffold_1:1428425-1429031	C	T	OK	299.087	351.307	0.232168	0.932086	Carboxylesterase (EC 3.1.1.1);Ontology_term
XLOC_000986	XLOC_000986	Scaffold_1:1429854-1430151	C	T	OK	570.887	604.626	0.0828365	0.279226	Transcriptional regulator%2C HxlR family
XLOC_000987	XLOC_000987	Scaffold_1:1430156-1430903	C	T	OK	223.21	216.106	-0.0466603	-0.179623	Oxidoreductase%2C short chain dehydrogenase/reductase family
XLOC_000988	XLOC_000988	Scaffold_1:1430968-1431247	C	T	OK	45.8029	85.4257	0.89923	1.90429	unknown
XLOC_000989	XLOC_000989	Scaffold_1:1432220-1432739	C	T	NOTEST	0	0	0	0	hypothetical protein
XLOC_000990	XLOC_000990	Scaffold_1:1432820-1433753	C	T	OK	438.484	411.336	-0.0922049	-0.410969	Protein rarD
XLOC_000991	XLOC_000991	Scaffold_1:1433827-1434103	C	T	OK	189.83	219.326	0.208373	0.598095	FIG01230496: hypothetical protein
XLOC_000992	XLOC_000992	Scaffold_1:1434104-1434455	C	T	OK	179.927	185.696	0.045537	0.14076	FIG011895: hypothetical protein
XLOC_000993	XLOC_000993	Scaffold_1:1434471-1435137	C	T	OK	377.226	353.974	-0.0917854	-0.375985	FIG013761: LmbE family protein
XLOC_000994	XLOC_000994	Scaffold_1:1437147-1437300	C	T	OK	1530.99	1416.19	-0.112457	-0.210711	hypothetical protein
XLOC_000995	XLOC_000995	Scaffold_1:1437657-1438968	C	T	OK	483.87	450.307	-0.103713	-0.481805	Gamma-D-glutamyl-meso-diaminopimelate peptidase (EC 3.4.19.11);Ontology_term
XLOC_000996	XLOC_000996	Scaffold_1:1439078-1440657	C	T	OK	761.362	457.015	-0.736342	-0.301608	Superoxide dismutase [Cu-Zn] precursor (EC 1.15.1.1);Ontology_term
XLOC_000997	XLOC_000997	Scaffold_1:1440667-1442581	C	T	OK	280.933	293.047	0.0609068	0.282912	Nitric oxide reductase activation protein NorD
XLOC_000998	XLOC_000998	Scaffold_1:1442965-1445800	C	T	OK	262.859	273.025	0.0547417	0.259587	2-oxoglutarate dehydrogenase E1 component (EC 1.2.4.2);Ontology_term
XLOC_000999	XLOC_000999	Scaffold_1:1445814-1447095	C	T	OK	478.293	458.886	-0.0597581	-0.279419	Dihydrolipoamide succinyltransferase component (E2) of 2-oxoglutarate dehydrogenase complex (EC 2.3.1.61);Ontology_term
XLOC_001000	XLOC_001000	Scaffold_1:1448321-1449662	C	T	OK	396.271	390.602	-0.0207847	-0.0959165	sodium-dependent transporter
XLOC_001001	XLOC_001001	Scaffold_1:1449716-1450417	C	T	OK	30.8323	36.7058	0.251563	0.0507159	hypothetical protein
XLOC_001002	XLOC_001002	Scaffold_1:1453797-1454392	C	T	OK	374.911	323.75	-0.211667	-0.337759	hypothetical protein
XLOC_001003	XLOC_001003	Scaffold_1:1454409-1454946	C	T	OK	285.565	296.6	0.0546997	0.201019	Aminoglycoside N6'-acetyltransferase (EC 2.3.1.82);Ontology_term
XLOC_001004	XLOC_001004	Scaffold_1:1458186-1458396	C	T	OK	75.7569	106.827	0.49583	0.715043	FIG01230826: hypothetical protein
XLOC_001005	XLOC_001005	Scaffold_1:1458832-1459177	C	T	OK	131.315	234.1	0.834093	2.45792	unknown
XLOC_001006	XLOC_001006	Scaffold_1:1459289-1459778	C	T	OK	370.95	357.477	-0.0533773	-0.192015	YocK
XLOC_001007	XLOC_001007	Scaffold_1:1461929-1463393	C	T	OK	477.603	419.685	-0.186505	-0.87659	Beta-lactamase (EC 3.5.2.6);Ontology_term
XLOC_001008	XLOC_001008	Scaffold_1:1463693-1464320	C	T	OK	175.567	161.671	-0.118964	-0.413208	FMN-dependent NADH-azoreductase
XLOC_001009	XLOC_001009	Scaffold_1:1466574-1469241	C	T	OK	340.819	337.86	-0.0125776	-0.0605159	Phosphoenolpyruvate synthase (EC 2.7.9.2);Ontology_term
XLOC_001010	XLOC_001010	Scaffold_1:1469326-1469455	C	T	NOTEST	0	0	0	0	hypothetical protein
XLOC_001011	XLOC_001011	Scaffold_1:1470675-1470789	C	T	NOTEST	0	0	0	0	hypothetical protein
XLOC_001012	XLOC_001012	Scaffold_1:1471722-1471959	C	T	OK	637.67	603.838	-0.0786478	-0.238927	spore coat protein (inner)
XLOC_001013	XLOC_001013	Scaffold_1:1472649-1473465	C	T	OK	335.855	367.174	0.128626	0.552974	Non-heme chloroperoxidase (EC 1.11.1.10);Ontology_term
XLOC_001014	XLOC_001014	Scaffold_1:1473696-1473906	C	T	OK	105.419	99.6774	-0.0808002	-0.115217	FIG01245164: hypothetical protein
XLOC_001015	XLOC_001015	Scaffold_1:1474137-1474389	C	T	OK	144.379	144.304	-0.000741862	-0.00166276	Inner spore coat protein D
XLOC_001016	XLOC_001016	Scaffold_1:1474759-1476109	C	T	OK	515.893	494.377	-0.0614602	-0.289168	FIG01250463: hypothetical protein
XLOC_001017	XLOC_001017	Scaffold_1:1478708-1478912	C	T	OK	158.598	162.943	0.0389948	0.0666971	hypothetical protein
XLOC_001018	XLOC_001018	Scaffold_1:1479067-1479238	C	T	OK	151.808	0	#NAME?	#NAME?	hypothetical protein
XLOC_001019	XLOC_001019	Scaffold_1:1480668-1480830	C	T	OK	79.1908	59.4243	-0.41428	-0.286839	hypothetical protein
XLOC_001020	XLOC_001020	Scaffold_1:1481352-1481748	C	T	OK	144.079	144.04	-0.000394977	-0.0012191	FIG01247435: hypothetical protein
XLOC_001021	XLOC_001021	Scaffold_1:1482102-1482222	C	T	NOTEST	0	0	0	0	hypothetical protein
XLOC_001022	XLOC_001022	Scaffold_1:1482404-1483070	C	T	OK	162.667	145.877	-0.157164	-0.545827	FIG01239291: hypothetical protein
XLOC_001023	XLOC_001023	Scaffold_1:1483926-1485072	C	T	OK	395.683	352.156	-0.168134	-0.739284	Possible D-alanyl-D-alanine carboxypeptidase (EC 3.4.16.4);Ontology_term
XLOC_001024	XLOC_001024	Scaffold_1:1487507-1487972	C	T	OK	67.2384	62.0951	-0.114806	-0.33488	unknown
XLOC_001025	XLOC_001025	Scaffold_1:1488301-1488508	C	T	OK	151.228	139.405	-0.117445	-0.206421	hypothetical protein
XLOC_001026	XLOC_001026	Scaffold_1:1488571-1492082	C	T	OK	1455.53	1328.57	-0.131667	-0.377287	Formate dehydrogenase related protein
XLOC_001027	XLOC_001027	Scaffold_1:1492179-1492910	C	T	OK	324.117	328.745	0.0204577	0.0639199	Putative toxin component near putative ESAT-related proteins%2C repetitive / Repetitive hypothetical protein near ESAT cluster%2C SA0282 homolog
XLOC_001028	XLOC_001028	Scaffold_1:1493875-1494397	C	T	OK	235.871	297.631	0.335524	1.21801	FIG01236840: hypothetical protein
XLOC_001029	XLOC_001029	Scaffold_1:1494556-1496362	C	T	OK	416.548	398.308	-0.0645982	-0.305642	ATP-dependent DNA helicase RecQ
XLOC_001030	XLOC_001030	Scaffold_1:1496598-1497408	C	T	OK	129.932	144.02	0.148519	0.526401	Cell wall-binding protein
XLOC_001031	XLOC_001031	Scaffold_1:1497568-1499158	C	T	OK	530.835	517.278	-0.0373243	-0.177465	Sodium/myo-inositol cotransporter
XLOC_001032	XLOC_001032	Scaffold_1:1500938-1501919	C	T	OK	74.961	76.711	0.0332935	0.114054	FIG01236146: hypothetical protein
XLOC_001033	XLOC_001033	Scaffold_1:1502071-1502605	C	T	OK	369.219	368.321	-0.0035129	-0.0126077	FIG01234361: hypothetical protein
XLOC_001034	XLOC_001034	Scaffold_1:1502774-1503992	C	T	OK	401.7	330.996	-0.279302	-1.28763	putative glycosyl transferase Family 4
XLOC_001035	XLOC_001035	Scaffold_1:1503998-1504692	C	T	OK	600.773	458.867	-0.388744	-0.453568	hypothetical protein
XLOC_001036	XLOC_001036	Scaffold_1:1505051-1505564	C	T	OK	76.2362	79.6147	0.062558	0.189825	FIG01240920: hypothetical protein
XLOC_001037	XLOC_001037	Scaffold_1:1505602-1506589	C	T	OK	306.114	317.393	0.0522026	0.229544	UDP-N-acetylglucosamine 4%2C6-dehydratase (EC 4.2.1.-);Ontology_term
XLOC_001038	XLOC_001038	Scaffold_1:1507463-1509205	C	T	OK	169.83	164.466	-0.0463004	-0.0509702	FIG01243198: hypothetical protein
XLOC_001039	XLOC_001039	Scaffold_1:1509345-1510170	C	T	OK	417.129	389.814	-0.097707	-0.434153	metallo-beta-lactamase family protein
XLOC_001040	XLOC_001040	Scaffold_1:1510255-1510588	C	T	OK	223.032	347.547	0.639959	2.04948	Transcriptional regulator%2C ArsR family
XLOC_001041	XLOC_001041	Scaffold_1:1511315-1512251	C	T	OK	439.479	437.423	-0.00676314	-0.0304568	Transcriptional regulator%2C DeoR family
XLOC_001042	XLOC_001042	Scaffold_1:1512304-1513059	C	T	OK	584.241	706.591	0.27431	0.88178	Transcriptional regulator
XLOC_001043	XLOC_001043	Scaffold_1:1513140-1513854	C	T	OK	299.883	290.644	-0.045145	-0.175773	metallo-beta-lactamase family protein
XLOC_001044	XLOC_001044	Scaffold_1:1513861-1514434	C	T	OK	915.391	863.934	-0.0834679	-0.372127	Transcriptional regulator%2C TetR family
XLOC_001045	XLOC_001045	Scaffold_1:1514677-1515577	C	T	OK	383.5	361.485	-0.0852876	-0.373965	FIG01236847: hypothetical protein
XLOC_001046	XLOC_001046	Scaffold_1:1515578-1517839	C	T	OK	595.726	601.814	0.0146686	0.0586447	FIG01244484: hypothetical protein
XLOC_001047	XLOC_001047	Scaffold_1:1517869-1518355	C	T	OK	510.564	571.409	0.162431	0.634241	FIG01235722: hypothetical protein
XLOC_001048	XLOC_001048	Scaffold_1:1519188-1519674	C	T	OK	427.346	441.254	0.0462048	0.170429	YvmB
XLOC_001049	XLOC_001049	Scaffold_1:1519774-1520374	C	T	OK	290.021	276.96	-0.06648	-0.248542	Transcriptional regulator%2C TetR family
XLOC_001050	XLOC_001050	Scaffold_1:1520386-1520791	C	T	OK	343.877	398.169	0.211488	0.736774	YnzE
XLOC_001051	XLOC_001051	Scaffold_1:1522392-1522725	C	T	OK	180.719	232.382	0.362748	1.14912	Protein secretion chaperonin CsaA
XLOC_001052	XLOC_001052	Scaffold_1:1525183-1526947	C	T	OK	401.013	391.882	-0.0332278	-0.156791	COG0488: ATPase components of ABC transporters with duplicated ATPase domains
XLOC_001053	XLOC_001053	Scaffold_1:1527093-1527219	C	T	NOTEST	0	0	0	0	hypothetical protein
XLOC_001054	XLOC_001054	Scaffold_1:1527220-1528789	C	T	OK	292.499	302.947	0.0506339	0.234801	Uncharacterized spore germination protein YndD
XLOC_001055	XLOC_001055	Scaffold_1:1528810-1529917	C	T	OK	832.1	701.467	-0.246382	-1.166	Uncharacterized spore germination protein YndE
XLOC_001056	XLOC_001056	Scaffold_1:1529947-1532231	C	T	OK	777.093	744.265	-0.0622702	-0.294332	Uncharacterized spore germination protein YndE
XLOC_001057	XLOC_001057	Scaffold_1:1532270-1533368	C	T	OK	446.496	427.795	-0.0617246	-0.283568	Uncharacterized spore germination protein YndE
XLOC_001058	XLOC_001058	Scaffold_1:1535031-1535508	C	T	OK	183.019	210.018	0.198519	0.683779	FIG01243411: hypothetical protein
XLOC_001059	XLOC_001059	Scaffold_1:1542352-1542481	C	T	NOTEST	0	0	0	0	hypothetical protein
XLOC_001060	XLOC_001060	Scaffold_1:1542534-1543251	C	T	OK	464.866	418.258	-0.152422	-0.670779	3-oxoacyl-[acyl-carrier protein] reductase (EC 1.1.1.100);Ontology_term
XLOC_001061	XLOC_001061	Scaffold_1:1550610-1552527	C	T	OK	315.765	305.051	-0.0497998	-0.234835	All7121 protein
XLOC_001062	XLOC_001062	Scaffold_1:1552596-1552761	C	T	OK	153.005	206.185	0.430362	0.445987	hypothetical protein
XLOC_001063	XLOC_001063	Scaffold_1:1553968-1558534	C	T	OK	396.63	388.873	-0.0284965	-0.138891	Glutamate synthase [NADPH] large chain (EC 1.4.1.13);Ontology_term
XLOC_001064	XLOC_001064	Scaffold_1:1558550-1560032	C	T	OK	222.752	249.189	0.161803	0.727599	Glutamate synthase [NADPH] small chain (EC 1.4.1.13);Ontology_term
XLOC_001065	XLOC_001065	Scaffold_1:1560265-1560588	C	T	OK	1320.01	1062.64	-0.312897	-0.939241	hypothetical protein
XLOC_001066	XLOC_001066	Scaffold_1:1560590-1563336	C	T	OK	353.815	322.735	-0.132647	-0.603451	FIG00672966: hypothetical protein
XLOC_001067	XLOC_001067	Scaffold_1:1563401-1564643	C	T	OK	224.22	222.917	-0.00840837	-0.0359821	Multidrug and toxin extrusion (MATE) family efflux pump YdhE/NorM%2C homolog
XLOC_001068	XLOC_001068	Scaffold_1:1564660-1565767	C	T	OK	385.617	388.807	0.0118861	0.054751	Putative mandelate racemase STM3833
XLOC_001069	XLOC_001069	Scaffold_1:1565857-1566481	C	T	OK	605.777	541.332	-0.162274	-0.713724	membrane protein%2C putative
XLOC_001070	XLOC_001070	Scaffold_1:1567875-1568586	C	T	OK	290.648	381.93	0.394033	1.59968	Phosphoadenylyl-sulfate reductase [thioredoxin] (EC 1.8.4.8) / Adenylyl-sulfate reductase [thioredoxin] (EC 1.8.4.10);Ontology_term
XLOC_001071	XLOC_001071	Scaffold_1:1568600-1569740	C	T	OK	256.687	268.666	0.0658031	0.287511	Sulfate permease%2C Pit-type
XLOC_001072	XLOC_001072	Scaffold_1:1570042-1570720	C	T	OK	300.812	289	-0.0577945	-0.223973	probable membrane protein yetF
XLOC_001073	XLOC_001073	Scaffold_1:1571122-1571923	C	T	OK	492.39	515.392	0.0658665	0.291374	Pyrroline-5-carboxylate reductase (EC 1.5.1.2);Ontology_term
XLOC_001074	XLOC_001074	Scaffold_1:1571961-1573083	C	T	OK	417.742	410.302	-0.0259253	-0.118731	Glutamate 5-kinase (EC 2.7.2.11) / RNA-binding C-terminal domain PUA;Ontology_term
XLOC_001075	XLOC_001075	Scaffold_1:1573108-1574380	C	T	OK	438.108	453.96	0.0512757	0.23907	Gamma-glutamyl phosphate reductase (EC 1.2.1.41);Ontology_term
XLOC_001076	XLOC_001076	Scaffold_1:1574588-1574939	C	T	OK	67.5599	57.8223	-0.224541	-0.546368	Transcriptional regulator%2C HxlR family
XLOC_001077	XLOC_001077	Scaffold_1:1575764-1576925	C	T	OK	230.876	268.138	0.215859	0.974684	Isovaleryl-CoA dehydrogenase (EC 1.3.8.4);Ontology_term
XLOC_001078	XLOC_001078	Scaffold_1:1576956-1578594	C	T	OK	315.457	313.039	-0.0111016	-0.0515076	Long-chain-fatty-acid--CoA ligase (EC 6.2.1.3) / Acetoacetyl-CoA synthetase [leucine] (EC 6.2.1.16);Ontology_term
XLOC_001079	XLOC_001079	Scaffold_1:1579102-1586728	C	T	OK	114.88	144.78	0.333736	1.61067	FIG01233961: hypothetical protein
XLOC_001080	XLOC_001080	Scaffold_1:1592999-1597286	C	T	OK	197.557	216.205	0.130127	0.624244	FIG01233961: hypothetical protein
XLOC_001081	XLOC_001081	Scaffold_1:1597303-1601107	C	T	OK	299.673	311.955	0.0579508	0.280179	FIG01239039: hypothetical protein
XLOC_001082	XLOC_001082	Scaffold_1:1601345-1602686	C	T	OK	337.566	330.514	-0.0304553	-0.140595	Biotin carboxylase of methylcrotonyl-CoA carboxylase (EC 6.3.4.14);Ontology_term
XLOC_001083	XLOC_001083	Scaffold_1:1602703-1602916	C	T	OK	68.5038	87.2205	0.348482	0.642172	Biotin carboxyl carrier protein of methylcrotonyl-CoA carboxylase
XLOC_001084	XLOC_001084	Scaffold_1:1602933-1603845	C	T	OK	247.488	243.181	-0.0253269	-0.101466	Hydroxymethylglutaryl-CoA lyase (EC 4.1.3.4);Ontology_term
XLOC_001085	XLOC_001085	Scaffold_1:1603866-1604649	C	T	OK	258.249	269.13	0.059542	0.246307	Methylglutaconyl-CoA hydratase (EC 4.2.1.18);Ontology_term
XLOC_001086	XLOC_001086	Scaffold_1:1604669-1606199	C	T	OK	326.104	359.116	0.139117	0.649823	Methylcrotonyl-CoA carboxylase carboxyl transferase subunit (EC 6.4.1.4);Ontology_term
XLOC_001087	XLOC_001087	Scaffold_1:1606229-1608182	C	T	OK	470.251	467.152	-0.00953788	-0.0458307	Acetoacetyl-CoA synthetase [leucine] (EC 6.2.1.16);Ontology_term
XLOC_001088	XLOC_001088	Scaffold_1:1608570-1608801	C	T	OK	471.554	490.817	0.057763	0.159071	DNA binding domain%2C excisionase family
XLOC_001089	XLOC_001089	Scaffold_1:1608924-1609634	C	T	OK	132.345	148.921	0.17024	0.485941	hypothetical protein
XLOC_001090	XLOC_001090	Scaffold_1:1609670-1610849	C	T	OK	302.253	324.471	0.102331	0.451917	NADH dehydrogenase (EC 1.6.99.3);Ontology_term
XLOC_001091	XLOC_001091	Scaffold_1:1611034-1613907	C	T	OK	1204.33	1195.94	-0.0100793	-0.0461786	Transcriptional regulator%2C TetR family
XLOC_001092	XLOC_001092	Scaffold_1:1613970-1615443	C	T	OK	397.72	353.731	-0.1691	-0.788156	D-alanyl-D-alanine carboxypeptidase (EC 3.4.16.4);Ontology_term
XLOC_001093	XLOC_001093	Scaffold_1:1615580-1617080	C	T	OK	652.857	619.416	-0.0758563	-0.362626	glycosyl transferase%2C group 1
XLOC_001094	XLOC_001094	Scaffold_1:1617356-1619582	C	T	OK	341.088	328.725	-0.0532634	-0.251683	Pyruvate formate-lyase (EC 2.3.1.54);Ontology_term
XLOC_001095	XLOC_001095	Scaffold_1:1619642-1620401	C	T	OK	352.806	312.772	-0.173763	-0.719599	Pyruvate formate-lyase activating enzyme (EC 1.97.1.4);Ontology_term
XLOC_001096	XLOC_001096	Scaffold_1:1620505-1621759	C	T	OK	214.782	242.492	0.175064	0.761323	3'-to-5' oligoribonuclease B%2C Bacillus type
XLOC_001097	XLOC_001097	Scaffold_1:1621856-1623044	C	T	OK	488.583	456.77	-0.097135	-0.455165	COG1649 predicted glycoside hydrolase
XLOC_001098	XLOC_001098	Scaffold_1:1623184-1624042	C	T	OK	210.134	215.174	0.0341887	0.135974	glucose uptake protein
XLOC_001099	XLOC_001099	Scaffold_1:1624968-1625562	C	T	OK	220.758	198.94	-0.150137	-0.539933	DUF1801 domain-containing protein
XLOC_001100	XLOC_001100	Scaffold_1:1625769-1626117	C	T	OK	326.064	280.184	-0.218783	-0.712734	Arsenical resistance operon repressor
XLOC_001101	XLOC_001101	Scaffold_1:1626239-1627535	C	T	OK	334.571	311.482	-0.103164	-0.467535	Arsenic efflux pump protein
XLOC_001102	XLOC_001102	Scaffold_1:1627557-1627977	C	T	OK	375.99	394.661	0.06992	0.251575	Arsenate reductase (EC 1.20.4.1);Ontology_term
XLOC_001103	XLOC_001103	Scaffold_1:1629682-1630687	C	T	OK	361.812	319.174	-0.180899	-0.778872	Predicted D-glucuronide-specific TRAP transporter%2C substrate-binding component
XLOC_001104	XLOC_001104	Scaffold_1:1630909-1631257	C	T	OK	204.689	230.988	0.174383	0.537927	Predicted D-glucuronide-specific TRAP transporter%2C small transmembrane component
XLOC_001105	XLOC_001105	Scaffold_1:1631295-1632591	C	T	OK	514.394	453.376	-0.182165	-0.847741	Predicted D-glucuronide-specific TRAP transporter%2C large transmembrane component
XLOC_001106	XLOC_001106	Scaffold_1:1632610-1635019	C	T	OK	377.795	348.751	-0.115404	-0.549637	Alpha-glucosidase (EC 3.2.1.20);Ontology_term
XLOC_001107	XLOC_001107	Scaffold_1:1635263-1636334	C	T	OK	263.869	241.947	-0.125133	-0.51571	Mannonate dehydratase (EC 4.2.1.8);Ontology_term
XLOC_001108	XLOC_001108	Scaffold_1:1636365-1637223	C	T	OK	444.668	420.004	-0.0823262	-0.36057	D-mannonate oxidoreductase (EC 1.1.1.57);Ontology_term
XLOC_001109	XLOC_001109	Scaffold_1:1637520-1637895	C	T	OK	142.596	143.334	0.00745119	0.02311	Transcriptional regulator%2C GntR family
XLOC_001110	XLOC_001110	Scaffold_1:1637897-1639416	C	T	OK	399.6	337.423	-0.244	-0.975261	ABC transporter%2C ATP-binding protein
XLOC_001111	XLOC_001111	Scaffold_1:1639688-1641632	C	T	OK	246.831	236.087	-0.064204	-0.295483	Activator of the mannose operon (transcriptional antiterminator)%2C BglG family
XLOC_001112	XLOC_001112	Scaffold_1:1643644-1645588	C	T	OK	449.502	402.402	-0.159691	-0.761282	PTS system%2C mannose-specific IIB component (EC 2.7.1.69) / PTS system%2C mannose-specific IIC component (EC 2.7.1.69) / PTS system%2C mannose-specific IIA component (EC 2.7.1.69);Ontology_term
XLOC_001113	XLOC_001113	Scaffold_1:1645606-1646563	C	T	OK	355.677	347.88	-0.031977	-0.142552	Mannose-6-phosphate isomerase (EC 5.3.1.8);Ontology_term
XLOC_001114	XLOC_001114	Scaffold_1:1647023-1648739	C	T	OK	262.386	271.754	0.0506104	0.233356	Butyryl-CoA dehydrogenase (EC 1.3.99.2);Ontology_term
XLOC_001115	XLOC_001115	Scaffold_1:1648754-1649642	C	T	OK	293.575	300.122	0.0318221	0.135474	3-hydroxyisobutyrate dehydrogenase (EC 1.1.1.31);Ontology_term
XLOC_001116	XLOC_001116	Scaffold_1:1649660-1651115	C	T	OK	488.222	472.066	-0.0485475	-0.230019	Methylmalonate-semialdehyde dehydrogenase (EC 1.2.1.27);Ontology_term
XLOC_001117	XLOC_001117	Scaffold_1:1651195-1651981	C	T	OK	314.755	329.59	0.0664416	0.280736	3-hydroxyisobutyryl-CoA hydrolase (EC 3.1.2.4);Ontology_term
XLOC_001118	XLOC_001118	Scaffold_1:1651996-1653058	C	T	OK	293.025	281.245	-0.0591984	-0.26049	3-hydroxyisobutyryl-CoA hydrolase (EC 3.1.2.4);Ontology_term
XLOC_001119	XLOC_001119	Scaffold_1:1653737-1654982	C	T	OK	286.504	275.148	-0.058348	-0.244374	MFS general substrate transporter
XLOC_001120	XLOC_001120	Scaffold_1:1654993-1656262	C	T	OK	345.342	301.42	-0.19625	-0.868114	possible carbamoyl-phosphate synthase large chain
XLOC_001121	XLOC_001121	Scaffold_1:1656460-1657573	C	T	OK	334.827	316.585	-0.0808234	-0.367951	Outer membrane protein romA
XLOC_001122	XLOC_001122	Scaffold_1:1657786-1658329	C	T	OK	539.021	575.935	0.0955654	0.397957	Alcohol dehydrogenase (EC 1.1.1.1);Ontology_term
XLOC_001123	XLOC_001123	Scaffold_1:1658458-1658626	C	T	OK	488.186	269.78	-0.85565	-1.30888	Alcohol dehydrogenase (EC 1.1.1.1);Ontology_term
XLOC_001124	XLOC_001124	Scaffold_1:1660445-1661536	C	T	OK	258.947	261.166	0.0123109	0.034192	Branched-chain amino acid transport protein AzlC
XLOC_001125	XLOC_001125	Scaffold_1:1661563-1662022	C	T	OK	432.938	393.412	-0.138118	-0.4972	Phenylacetic acid degradation protein PaaD%2C thioesterase
XLOC_001126	XLOC_001126	Scaffold_1:1662242-1663562	C	T	OK	199.325	191.031	-0.061314	-0.252649	Branched-chain amino acid transport system carrier protein
XLOC_001127	XLOC_001127	Scaffold_1:1663699-1665106	C	T	OK	219.173	191.682	-0.193357	-0.835489	Pectin lyase like protein
XLOC_001128	XLOC_001128	Scaffold_1:1665384-1666563	C	T	OK	458.374	402.101	-0.188968	-0.866056	Major facilitator family transporter
XLOC_001129	XLOC_001129	Scaffold_1:1666653-1667142	C	T	OK	187.602	164.802	-0.186947	-0.627336	hypothetical protein
XLOC_001130	XLOC_001130	Scaffold_1:1667499-1668636	C	T	OK	363.874	339.184	-0.101372	-0.456816	Carboxylic ester hydrolase
XLOC_001131	XLOC_001131	Scaffold_1:1672523-1673237	C	T	OK	240.664	185.19	-0.378016	-1.40125	Nitric oxide-dependent regulator DnrN or NorA
XLOC_001132	XLOC_001132	Scaffold_1:1676963-1678148	C	T	OK	418.984	381.188	-0.13639	-0.626258	Nitrate/nitrite transporter
XLOC_001133	XLOC_001133	Scaffold_1:1678294-1679008	C	T	OK	337.689	370.701	0.13456	0.550318	transcriptional regulator%2C Crp/Fnr family
XLOC_001134	XLOC_001134	Scaffold_1:1679925-1680393	C	T	OK	431.347	362.94	-0.24912	-0.908789	Probable transcription regulator arfM
XLOC_001135	XLOC_001135	Scaffold_1:1680505-1681609	C	T	OK	430.273	412.174	-0.0619992	-0.2857	Radical SAM domain heme biosynthesis protein
XLOC_001136	XLOC_001136	Scaffold_1:1681688-1683181	C	T	OK	821.002	733.611	-0.162371	-0.288963	FIG01243548: hypothetical protein
XLOC_001137	XLOC_001137	Scaffold_1:1683354-1688500	C	T	OK	713.251	639.855	-0.156665	-0.658141	Respiratory nitrate reductase alpha chain (EC 1.7.99.4);Ontology_term
XLOC_001138	XLOC_001138	Scaffold_1:1688517-1689743	C	T	OK	978.586	908.788	-0.106755	-0.477278	Respiratory nitrate reductase delta chain (EC 1.7.99.4);Ontology_term
XLOC_001139	XLOC_001139	Scaffold_1:1689855-1690200	C	T	OK	198.086	243.221	0.296146	0.903043	FIG01235320: hypothetical protein
XLOC_001140	XLOC_001140	Scaffold_1:1691985-1692330	C	T	OK	296.945	288.679	-0.0407271	-0.130233	unknown
XLOC_001141	XLOC_001141	Scaffold_1:1692358-1692484	C	T	OK	721.145	0	#NAME?	#NAME?	hypothetical protein
XLOC_001142	XLOC_001142	Scaffold_1:1692793-1693576	C	T	OK	476.037	414.386	-0.200098	-0.873326	2%2C3-butanediol dehydrogenase%2C S-alcohol forming%2C (R)-acetoin-specific (EC 1.1.1.4) / Acetoin (diacetyl) reductase (EC 1.1.1.5);Ontology_term
XLOC_001143	XLOC_001143	Scaffold_1:1699617-1700727	C	T	OK	203.409	187.224	-0.119615	-0.473635	Transcriptional repressor of arabinoside utilization operon%2C GntR family
XLOC_001144	XLOC_001144	Scaffold_1:1706351-1706945	C	T	OK	370.425	339.565	-0.125495	-0.495883	Acyl-phosphate:glycerol-3-phosphate O-acyltransferase PlsY
XLOC_001145	XLOC_001145	Scaffold_1:1707047-1707335	C	T	OK	142.134	156.193	0.136075	0.361205	FIG01226527: hypothetical protein
XLOC_001146	XLOC_001146	Scaffold_1:1707628-1708778	C	T	OK	949.388	581.133	-0.708129	-0.173305	Glycerate kinase (EC 2.7.1.31);Ontology_term
XLOC_001147	XLOC_001147	Scaffold_1:1709086-1709449	C	T	OK	551.819	445.592	-0.308471	-1.10268	FIG01233889: hypothetical protein
XLOC_001148	XLOC_001148	Scaffold_1:1714704-1714851	C	T	NOTEST	0	0	0	0	Small%2C acid-soluble spore protein O
XLOC_001149	XLOC_001149	Scaffold_1:1714892-1715039	C	T	OK	0	116.83	inf	#NAME?	Small%2C acid-soluble spore protein P
XLOC_001150	XLOC_001150	Scaffold_1:1715175-1715583	C	T	OK	242.902	231.644	-0.0684651	-0.221949	Spore coat protein M
XLOC_001151	XLOC_001151	Scaffold_1:1715787-1716216	C	T	OK	555.338	517.07	-0.103007	-0.391131	alternate gene name: yoxJ
XLOC_001152	XLOC_001152	Scaffold_1:1718224-1718386	C	T	OK	101.468	403.167	1.99036	1.78699	unknown
XLOC_001153	XLOC_001153	Scaffold_1:1722956-1723689	C	T	OK	245.268	217.814	-0.171264	-0.642603	SOS-response repressor and protease LexA (EC 3.4.21.88);Ontology_term
XLOC_001154	XLOC_001154	Scaffold_1:1731669-1732600	C	T	OK	1292.26	1348.62	0.0615824	0.00849368	hypothetical protein
XLOC_001155	XLOC_001155	Scaffold_1:1735659-1736016	C	T	OK	221.147	260.078	0.233934	0.767991	hypothetical protein
XLOC_001156	XLOC_001156	Scaffold_1:1738111-1738225	C	T	OK	1350.46	0	#NAME?	#NAME?	hypothetical protein
XLOC_001157	XLOC_001157	Scaffold_1:1738540-1739122	C	T	OK	424.319	444.105	0.0657513	0.262393	FIG01242824: hypothetical protein
XLOC_001158	XLOC_001158	Scaffold_1:1748232-1749087	C	T	OK	607.902	529.805	-0.198377	-0.916102	catalase%2C Mn-containing
XLOC_001159	XLOC_001159	Scaffold_1:1753959-1754190	C	T	OK	21.0211	33.4871	0.671768	0.636759	conserved hypothetical protein
XLOC_001160	XLOC_001160	Scaffold_1:1755475-1755625	C	T	OK	85.684	0	#NAME?	#NAME?	hypothetical protein
XLOC_001161	XLOC_001161	Scaffold_1:1771033-1771978	C	T	OK	382.831	401.426	0.068426	0.3063	Eukaryotic-type low-affinity urea transporter
XLOC_001162	XLOC_001162	Scaffold_1:1786004-1786309	C	T	OK	63.8537	34.842	-0.873945	-1.12561	hypothetical protein
XLOC_001163	XLOC_001163	Scaffold_1:1786365-1786815	C	T	OK	625.917	564.142	-0.149914	-0.584481	Arginine/ornithine antiporter ArcD
XLOC_001164	XLOC_001164	Scaffold_1:1786836-1787322	C	T	OK	254.1	228.342	-0.154201	-0.529969	Arginine/ornithine antiporter ArcD
XLOC_001165	XLOC_001165	Scaffold_1:1787812-1788574	C	T	OK	442.327	427.303	-0.0498538	-0.216807	N-acetylmuramoyl-L-alanine amidase (EC 3.5.1.28);Ontology_term
XLOC_001166	XLOC_001166	Scaffold_1:1791438-1792311	C	T	OK	413.683	382.02	-0.114877	-0.515396	FIG01251067: hypothetical protein
XLOC_001167	XLOC_001167	Scaffold_1:1798602-1799347	C	T	OK	484.031	847.973	0.808919	0.406215	hypothetical protein
XLOC_001168	XLOC_001168	Scaffold_1:1799741-1800059	C	T	OK	222.73	241.164	0.114722	0.353243	Multidrug resistance protein EbrA
XLOC_001169	XLOC_001169	Scaffold_1:1800072-1800884	C	T	OK	738.041	605.786	-0.284893	-0.812554	Multidrug resistance protein EbrB
XLOC_001170	XLOC_001170	Scaffold_1:1801049-1801355	C	T	OK	857.743	823.545	-0.0586969	-0.202317	FIG01251055: hypothetical protein
XLOC_001171	XLOC_001171	Scaffold_1:1803549-1804809	C	T	OK	608.576	570.699	-0.0927074	-0.439682	Spore protein YdhD%2C not involved in spore germination
XLOC_001172	XLOC_001172	Scaffold_1:1804920-1805417	C	T	OK	822.579	577.463	-0.510425	-1.7356	Spore coat protein F
XLOC_001173	XLOC_001173	Scaffold_1:1808794-1809829	C	T	OK	186.3	226.961	0.284823	1.12079	Beta-lactamase (EC 3.5.2.6);Ontology_term
XLOC_001174	XLOC_001174	Scaffold_1:1809862-1810513	C	T	OK	893.345	827.979	-0.109622	-0.504585	YqeD
XLOC_001175	XLOC_001175	Scaffold_1:1818060-1818180	C	T	OK	1491.38	505.756	-1.56013	-0.765665	hypothetical protein
XLOC_001176	XLOC_001176	Scaffold_1:1819380-1819773	C	T	OK	383.714	358.608	-0.0976242	-0.344298	Putative 2Fe-2S ferredoxin CbiW involved in B12 biosynthesis
XLOC_001177	XLOC_001177	Scaffold_1:1819783-1820776	C	T	OK	177.179	159.907	-0.147976	-0.570555	Putative metal chaperone%2C involved in Zn homeostasis%2C GTPase of COG0523 family
XLOC_001178	XLOC_001178	Scaffold_1:1875574-1875721	C	T	OK	620.128	695.599	0.165689	0.180771	hypothetical protein
XLOC_001179	XLOC_001179	Scaffold_1:1958742-1958868	C	T	NOTEST	0	0	0	0	LSU ribosomal protein L28p
XLOC_001180	XLOC_001180	Scaffold_1:1976748-1978461	C	T	OK	367.694	369.104	0.00552243	0.0259854	Fibronectin/fibrinogen-binding protein
XLOC_001181	XLOC_001181	Scaffold_1:1995763-1995910	C	T	NOTEST	0	0	0	0	hypothetical protein
XLOC_001182	XLOC_001182	Scaffold_1:2030128-2032194	C	T	NOTEST	0	0	0	0	hypothetical protein
XLOC_001183	XLOC_001183	Scaffold_1:2039193-2039673	C	T	OK	433.357	431.914	-0.00481119	-0.0185039	Uncharacterized N-acetyltransferase BT9727_3663 (EC 2.3.1.-);Ontology_term
XLOC_001184	XLOC_001184	Scaffold_1:2041393-2042644	C	T	OK	293.015	309.088	0.0770457	0.345563	FIG007079: UPF0348 protein family
XLOC_001185	XLOC_001185	Scaffold_1:2044008-2045229	C	T	OK	510.739	480.892	-0.0868734	-0.40405	FIGfam003972: membrane protein
XLOC_001186	XLOC_001186	Scaffold_1:2047424-2047601	C	T	OK	767.114	742.071	-0.0478833	-0.101235	hypothetical protein
XLOC_001187	XLOC_001187	Scaffold_1:2050285-2050645	C	T	OK	847.221	822.13	-0.0433719	-0.166761	Phenylalanyl-tRNA synthetase alpha subunit
XLOC_001188	XLOC_001188	Scaffold_1:2057033-2057162	C	T	NOTEST	0	0	0	0	Heme A synthase%2C cytochrome oxidase biogenesis protein Cox15-CtaA
XLOC_001189	XLOC_001189	Scaffold_1:2057166-2058075	C	T	OK	476.332	431.709	-0.141909	-0.641233	Heme A synthase%2C cytochrome oxidase biogenesis protein Cox15-CtaA
XLOC_001190	XLOC_001190	Scaffold_1:2062930-2063215	C	T	OK	55.4068	41.4188	-0.419775	-0.687486	hypothetical protein
XLOC_001191	XLOC_001191	Scaffold_1:2064685-2065168	C	T	OK	158.776	136.356	-0.21962	-0.72597	FIG01108239: hypothetical protein
XLOC_001192	XLOC_001192	Scaffold_1:2066793-2067408	C	T	OK	404.673	367.786	-0.137891	-0.533741	Phosphonate ABC transporter phosphate-binding periplasmic component (TC 3.A.1.9.1)
XLOC_001193	XLOC_001193	Scaffold_1:2067545-2067734	C	T	OK	45.9884	72.0011	0.64675	0.589219	FIG01225604: hypothetical protein
XLOC_001194	XLOC_001194	Scaffold_1:2067872-2069369	C	T	OK	262.537	245.339	-0.097748	-0.445336	FIG01242465: hypothetical protein
XLOC_001195	XLOC_001195	Scaffold_1:2069441-2069948	C	T	OK	277.896	303.942	0.129252	0.457483	FIG01237263: hypothetical protein
XLOC_001196	XLOC_001196	Scaffold_1:2072346-2072535	C	T	OK	305.174	186.482	-0.710597	-1.1472	FIG01226072: hypothetical protein
XLOC_001197	XLOC_001197	Scaffold_1:2074498-2075134	C	T	OK	248.118	223.963	-0.147765	-0.542167	FIG01108286: hypothetical protein
XLOC_001198	XLOC_001198	Scaffold_1:2075186-2077183	C	T	OK	383.808	340.672	-0.171998	-0.75957	Arginine decarboxylase (EC 4.1.1.19);Ontology_term
XLOC_001199	XLOC_001199	Scaffold_1:2077724-2078105	C	T	OK	103.434	105.23	0.0248252	0.0725765	small peptidoglycan-associated lipoprotein
XLOC_001200	XLOC_001200	Scaffold_1:2084482-2084614	C	T	OK	4998.9	2869.68	-0.800719	-1.271	hypothetical protein
XLOC_001201	XLOC_001201	Scaffold_1:2084731-2085289	C	T	OK	573.62	498.043	-0.203824	-0.808231	Peptide deformylase (EC 3.5.1.88);Ontology_term
XLOC_001202	XLOC_001202	Scaffold_1:2086279-2086468	C	T	OK	32.8176	20.7799	-0.65928	-0.485685	hypothetical protein
XLOC_001203	XLOC_001203	Scaffold_1:2086500-2086710	C	T	OK	15.8119	49.072	1.63388	1.41314	Protein of unknown function DUF1447
XLOC_001204	XLOC_001204	Scaffold_1:2086714-2088382	C	T	OK	291.372	274.851	-0.0842108	-0.391904	Ribonuclease J1 (endonuclease and 5' exonuclease)
XLOC_001205	XLOC_001205	Scaffold_1:2090208-2090940	C	T	OK	0	954.72	inf	#NAME?	hypothetical protein
XLOC_001206	XLOC_001206	Scaffold_1:2093100-2094108	C	T	OK	536.61	472.868	-0.182436	-0.835703	Cell-shape determining protein MreBH
XLOC_001207	XLOC_001207	Scaffold_1:2094181-2094313	C	T	OK	284.665	152.019	-0.905012	-0.420201	hypothetical protein
XLOC_001208	XLOC_001208	Scaffold_1:2094402-2095635	C	T	OK	426.655	410.337	-0.0562596	-0.258325	Aminopeptidase S (Leu%2C Val%2C Phe%2C Tyr preference) (EC 3.4.11.24);Ontology_term
XLOC_001209	XLOC_001209	Scaffold_1:2097982-2098225	C	T	OK	352.508	339.858	-0.0527223	-0.144902	FIG01240896: hypothetical protein
XLOC_001210	XLOC_001210	Scaffold_1:2098237-2098507	C	T	OK	1089	832.224	-0.387959	-1.35376	unknown
XLOC_001211	XLOC_001211	Scaffold_1:2110944-2111322	C	T	OK	51.2203	54.8775	0.0994986	0.247156	FIG01238780: hypothetical protein
XLOC_001212	XLOC_001212	Scaffold_1:2115719-2116676	C	T	OK	314.65	323.579	0.0403694	0.162333	Sporulation protein Cse15
XLOC_001213	XLOC_001213	Scaffold_1:2129967-2130825	C	T	OK	378.577	371.349	-0.0278122	-0.116547	Ser/Thr protein phosphatase family protein
XLOC_001214	XLOC_001214	Scaffold_1:2131002-2131500	C	T	OK	549.801	474.025	-0.213947	-0.837728	Protein erfK/srfK precursor
XLOC_001215	XLOC_001215	Scaffold_1:2131588-2132890	C	T	OK	256.982	243.921	-0.0752572	-0.332785	Macrolide-efflux protein
XLOC_001216	XLOC_001216	Scaffold_1:2133031-2133493	C	T	OK	292.131	254.851	-0.196962	-0.669132	FIG01226255: hypothetical protein
XLOC_001217	XLOC_001217	Scaffold_1:2136594-2136783	C	T	OK	94.1061	200.303	1.08982	1.67253	FIG01233382: hypothetical protein
XLOC_001218	XLOC_001218	Scaffold_1:2136974-2138144	C	T	OK	279.373	270.916	-0.0443482	-0.192709	N-acetyl-L%2CL-diaminopimelate aminotransferase (EC 2.6.1.-);Ontology_term
XLOC_001219	XLOC_001219	Scaffold_1:2142601-2143363	C	T	OK	151.85	198.014	0.382952	1.34202	FIG01228050: hypothetical protein
XLOC_001220	XLOC_001220	Scaffold_1:2147315-2147963	C	T	OK	567.588	511.747	-0.149413	-0.636886	FIG01227912: hypothetical protein
XLOC_001221	XLOC_001221	Scaffold_1:2157196-2157331	C	T	OK	131.508	289.804	1.13993	0.567615	hypothetical protein
XLOC_001222	XLOC_001222	Scaffold_1:2164139-2164328	C	T	OK	1522.71	1132.15	-0.427573	-1.30136	FIG01225871: hypothetical protein
XLOC_001223	XLOC_001223	Scaffold_1:2167027-2167645	C	T	OK	1231.79	1108.52	-0.152122	-0.705799	FIG01239722: hypothetical protein
XLOC_001224	XLOC_001224	Scaffold_1:2167668-2168373	C	T	OK	424.08	367.5	-0.206594	-0.8713	FIG01239722: hypothetical protein
XLOC_001225	XLOC_001225	Scaffold_1:2168470-2168716	C	T	OK	197.778	116.564	-0.762757	-1.85181	hypothetical protein
XLOC_001226	XLOC_001226	Scaffold_1:2169280-2169763	C	T	OK	157.262	116.613	-0.431442	-1.38574	putative membrane protein
XLOC_001227	XLOC_001227	Scaffold_1:2169773-2169995	C	T	OK	331.499	259.79	-0.35166	-0.814756	Transcriptional regulator%2C Cro/CI family
XLOC_001228	XLOC_001228	Scaffold_1:2170102-2170897	C	T	OK	502.366	493.757	-0.0249364	-0.109114	membrane protein%2C putative
XLOC_001229	XLOC_001229	Scaffold_1:2171402-2172648	C	T	OK	2906.78	3224.33	0.149581	0.0316391	response regulator aspartate phosphatase
XLOC_001230	XLOC_001230	Scaffold_1:2177171-2179268	C	T	OK	272.016	280.152	0.0425198	0.197516	ClpB protein
XLOC_001231	XLOC_001231	Scaffold_1:2179466-2181042	C	T	OK	610.777	580.698	-0.0728577	-0.328081	Flagellar motor rotation protein MotA
XLOC_001232	XLOC_001232	Scaffold_1:2181758-2183270	C	T	OK	254.556	249.294	-0.030131	-0.135259	sensor histidine kinase KinD
XLOC_001233	XLOC_001233	Scaffold_1:2183786-2184558	C	T	OK	881.705	746.507	-0.240141	-0.869951	DUF1232 domain-containing protein
XLOC_001234	XLOC_001234	Scaffold_1:2189155-2189935	C	T	OK	479.648	462.155	-0.0535982	-0.23987	Aliphatic amidase AmiE (EC 3.5.1.4);Ontology_term
XLOC_001235	XLOC_001235	Scaffold_1:2190244-2191441	C	T	OK	669.302	648.386	-0.0458042	-0.2174	5-methylthioribose kinase (EC 2.7.1.100);Ontology_term
XLOC_001236	XLOC_001236	Scaffold_1:2191446-2192508	C	T	OK	468.744	452.126	-0.0520757	-0.240965	Methylthioribose-1-phosphate isomerase (EC 5.3.1.23);Ontology_term
XLOC_001237	XLOC_001237	Scaffold_1:2195744-2196770	C	T	OK	376.85	380.693	0.0146368	0.064179	membrane protein%2C putative
XLOC_001238	XLOC_001238	Scaffold_1:2202119-2202839	C	T	OK	280.477	273.61	-0.0357606	-0.139012	FIG01228638: hypothetical protein
XLOC_001239	XLOC_001239	Scaffold_1:2202969-2203167	C	T	OK	91.9706	193.922	1.07623	1.74477	Small acid-soluble spore protein%2C alpha/beta family%2C SASP_6
XLOC_001240	XLOC_001240	Scaffold_1:2207288-2208941	C	T	OK	468.574	418.514	-0.162999	-0.766462	Predicted signal transduction protein
XLOC_001241	XLOC_001241	Scaffold_1:2209089-2209962	C	T	OK	366.508	346.248	-0.0820405	-0.353852	Ku domain protein
XLOC_001242	XLOC_001242	Scaffold_1:2209965-2211816	C	T	OK	200.254	207.336	0.0501402	0.22761	ATP-dependent DNA ligase (EC 6.5.1.1) clustered with Ku protein%2C LigD;Ontology_term
XLOC_001243	XLOC_001243	Scaffold_1:2213087-2213420	C	T	OK	191.854	172.347	-0.154692	-0.476296	global nitrogen regulation (positive regulation of nrgAB%2C nasB%2C gabP%2C ureABC%3B negative regulation of glnRA)
XLOC_001244	XLOC_001244	Scaffold_1:2216305-2217259	C	T	OK	492.201	454.381	-0.115346	-0.526288	Major intracellular serine protease precursor (EC 3.4.21.-);Ontology_term
XLOC_001245	XLOC_001245	Scaffold_1:2217727-2220016	C	T	OK	473.467	437.596	-0.113666	-0.54567	5-methyltetrahydropteroyltriglutamate--homocysteine methyltransferase (EC 2.1.1.14);Ontology_term
XLOC_001246	XLOC_001246	Scaffold_1:2220223-2221248	C	T	OK	506.885	478.628	-0.0827534	-0.256932	FIG01234207: hypothetical protein
XLOC_001247	XLOC_001247	Scaffold_1:2222187-2222658	C	T	OK	415.761	443.8	0.0941554	0.349884	Guanine deaminase (EC 3.5.4.3);Ontology_term
XLOC_001248	XLOC_001248	Scaffold_1:2223999-2224452	C	T	OK	518.336	447.821	-0.210967	-0.799189	Organic hydroperoxide resistance transcriptional regulator
XLOC_001249	XLOC_001249	Scaffold_1:2234987-2235854	C	T	OK	517.841	506.518	-0.0318958	-0.146807	NG%2CNG-dimethylarginine dimethylaminohydrolase 1 (EC 3.5.3.18);Ontology_term
XLOC_001250	XLOC_001250	Scaffold_1:2248284-2249589	C	T	OK	309.759	290.381	-0.0931995	-0.420362	Serine protease%2C DegP/HtrA%2C do-like (EC 3.4.21.-);Ontology_term
XLOC_001251	XLOC_001251	Scaffold_1:2250928-2252272	C	T	OK	504.734	510.134	0.0153533	0.072365	amino acid permease family protein
XLOC_001252	XLOC_001252	Scaffold_1:2276707-2282079	C	T	OK	220.539	0	#NAME?	#NAME?	hypothetical protein
XLOC_001253	XLOC_001253	Scaffold_1:2282495-2283113	C	T	OK	150.727	156.365	0.0529749	0.182822	Phosphate transport regulator (distant homolog of PhoU)
XLOC_001254	XLOC_001254	Scaffold_1:2283125-2284124	C	T	OK	431.348	405.573	-0.088893	-0.398652	Probable low-affinity inorganic phosphate transporter
XLOC_001255	XLOC_001255	Scaffold_1:2284233-2285153	C	T	OK	280.641	241.032	-0.2195	-0.155834	alternate gene name: ykaC lethal when synthesized during vegetative growth in the absence of SpoIISB
XLOC_001256	XLOC_001256	Scaffold_1:2285246-2285378	C	T	NOTEST	0	0	0	0	hypothetical protein
XLOC_001257	XLOC_001257	Scaffold_1:2302987-2303104	C	T	NOTEST	0	0	0	0	hypothetical protein
XLOC_001258	XLOC_001258	Scaffold_1:2317021-2317375	C	T	OK	184.588	134.058	-0.461447	-1.45276	negative regulation of the defective prophage PBSX genes
XLOC_001259	XLOC_001259	Scaffold_1:2317605-2318220	C	T	OK	411.965	398.166	-0.0491521	-0.19595	phage-like element PBSX protein XkdA
XLOC_001260	XLOC_001260	Scaffold_1:2319347-2320026	C	T	OK	269.755	254.364	-0.0847535	-0.309291	FIG01249225: hypothetical protein
XLOC_001261	XLOC_001261	Scaffold_1:2320066-2322156	C	T	OK	441.586	407.646	-0.115378	-0.479856	Transcriptional regulator%2C TetR family
XLOC_001262	XLOC_001262	Scaffold_1:2323404-2323953	C	T	OK	349.911	300.047	-0.221799	-0.798542	Uncharacterized protein yoeB precursor
XLOC_001263	XLOC_001263	Scaffold_1:2325387-2326275	C	T	OK	423.166	450.598	0.0906181	0.407172	LysR family transcriptional regulator STM2281
XLOC_001264	XLOC_001264	Scaffold_1:2330224-2331115	C	T	OK	542.746	489.011	-0.150409	-0.670388	LysR family transcriptional regulator YeiE
XLOC_001265	XLOC_001265	Scaffold_1:2331323-2331611	C	T	OK	372.063	319.936	-0.217763	-0.673438	FIG01246012: hypothetical protein
XLOC_001266	XLOC_001266	Scaffold_1:2333112-2333844	C	T	OK	693.946	576.008	-0.268733	-1.19884	Site-specific tyrosine recombinase
XLOC_001267	XLOC_001267	Scaffold_1:2335381-2336362	C	T	OK	336.919	317.391	-0.0861392	-0.369667	hypothetical protein
XLOC_001268	XLOC_001268	Scaffold_1:2337889-2338840	C	T	OK	215.685	240.328	0.156081	0.62606	Arabinan endo-1%2C5-alpha-L-arabinosidase (EC 3.2.1.99);Ontology_term
XLOC_001269	XLOC_001269	Scaffold_1:2342022-2343213	C	T	OK	591.784	532.928	-0.151128	-0.712657	DUF819 domain-containing protein
XLOC_001270	XLOC_001270	Scaffold_1:2345856-2346804	C	T	OK	226.358	239.823	0.0833655	0.343947	FIG01248074: hypothetical protein
XLOC_001271	XLOC_001271	Scaffold_1:2346865-2347372	C	T	OK	409.817	360.944	-0.183206	-0.684611	conserved hypothetical protein%3B RBL00553
XLOC_001272	XLOC_001272	Scaffold_1:2347383-2347839	C	T	OK	230.545	250.864	0.121854	0.415257	BH3131 unknown
XLOC_001273	XLOC_001273	Scaffold_1:2347950-2348673	C	T	OK	596.928	581.452	-0.0378972	-0.169264	Putative acetyl esterase YjcH (EC 3.1.1.-);Ontology_term
XLOC_001274	XLOC_001274	Scaffold_1:2348737-2349247	C	T	OK	184.095	180.991	-0.0245323	-0.0818154	2H phosphoesterase superfamily protein Bsu1186 (yjcG)
XLOC_001275	XLOC_001275	Scaffold_1:2349256-2349676	C	T	OK	235.547	214.802	-0.133009	-0.440949	GNAT family acetyltransferase YjcF
XLOC_001276	XLOC_001276	Scaffold_1:2349841-2350237	C	T	OK	245.893	220.418	-0.15779	-0.517257	YngA
XLOC_001277	XLOC_001277	Scaffold_1:2350259-2352133	C	T	OK	437.224	475.845	0.122119	0.543748	UTP--glucose-1-phosphate uridylyltransferase (EC 2.7.7.9);Ontology_term
XLOC_001278	XLOC_001278	Scaffold_1:2352240-2352816	C	T	OK	260.026	293.92	0.176766	0.654033	FIG139438: lipoprotein B
XLOC_001279	XLOC_001279	Scaffold_1:2353234-2355514	C	T	OK	238.151	268.142	0.17112	0.801291	putative ATP-dependent DNA helicase YjcD
XLOC_001280	XLOC_001280	Scaffold_1:2357147-2357534	C	T	OK	814.064	794.106	-0.0358111	-0.13583	Spore coat protein V
XLOC_001281	XLOC_001281	Scaffold_1:2357582-2357936	C	T	OK	492.744	514.103	0.0612179	0.211359	Spore coat protein W
XLOC_001282	XLOC_001282	Scaffold_1:2358003-2358510	C	T	OK	225.695	193.818	-0.219674	-0.75652	Spore coat protein X
XLOC_001283	XLOC_001283	Scaffold_1:2358642-2359125	C	T	OK	201.163	191.272	-0.0727386	-0.247104	Spore coat protein Y
XLOC_001284	XLOC_001284	Scaffold_1:2359275-2359725	C	T	OK	217.603	226.43	0.0573666	0.190413	Spore coat protein Z
XLOC_001285	XLOC_001285	Scaffold_1:2368838-2369579	C	T	OK	517.875	505.295	-0.0354766	-0.160374	Diadenosine tetraphosphatase
XLOC_001286	XLOC_001286	Scaffold_1:2372479-2373052	C	T	OK	101.285	117.62	0.215716	0.700506	Adenylate cyclase (EC 4.6.1.1);Ontology_term
XLOC_001287	XLOC_001287	Scaffold_1:2373064-2373718	C	T	OK	202.318	206.834	0.0318454	0.115084	Membrane-bound lytic murein transglycosylase D precursor (EC 3.2.1.-);Ontology_term
XLOC_001288	XLOC_001288	Scaffold_1:2373894-2374074	C	T	OK	45.0062	67.7491	0.590078	0.537588	hypothetical protein
XLOC_001289	XLOC_001289	Scaffold_1:2374202-2375500	C	T	OK	231.731	281.89	0.282683	0.820525	Hemoglobin-like protein HbO
XLOC_001290	XLOC_001290	Scaffold_1:2375911-2376079	C	T	OK	232.325	185.038	-0.328317	-0.365101	FIG01226944: hypothetical protein
XLOC_001291	XLOC_001291	Scaffold_1:2379536-2381060	C	T	OK	280.626	287.221	0.0335147	0.153025	Sensor kinase CitA%2C DpiB (EC 2.7.3.-);Ontology_term
XLOC_001292	XLOC_001292	Scaffold_1:2381063-2381783	C	T	OK	226.273	234.648	0.0524331	0.195078	Transcriptional regulatory protein CitB%2C DpiA
XLOC_001293	XLOC_001293	Scaffold_1:2387591-2388254	C	T	OK	292.428	338.492	0.211041	0.801019	membrane protein%2C putative
XLOC_001294	XLOC_001294	Scaffold_1:2395985-2396978	C	T	OK	365.443	357.967	-0.029821	-0.132221	Tryptophanyl-tRNA synthetase (EC 6.1.1.2);Ontology_term
XLOC_001295	XLOC_001295	Scaffold_1:2398056-2398176	C	T	NOTEST	0	0	0	0	hypothetical protein
XLOC_001296	XLOC_001296	Scaffold_1:2411044-2411287	C	T	OK	153.911	247.365	0.684539	1.71777	unknown
XLOC_001297	XLOC_001297	Scaffold_1:2414210-2414396	C	T	OK	610.488	416.035	-0.553258	-1.25146	Putative uncharacterized protein GBAA1178
XLOC_001298	XLOC_001298	Scaffold_1:2414820-2415633	C	T	OK	253.292	250.673	-0.0149976	-0.0596211	Undecaprenyl-diphosphatase (EC 3.6.1.27);Ontology_term
XLOC_001299	XLOC_001299	Scaffold_1:2426661-2427474	C	T	OK	275.025	292.256	0.0876701	0.362736	FIG002540: Haloacid dehalogenase-like hydrolase
XLOC_001300	XLOC_001300	Scaffold_1:2427572-2427713	C	T	OK	195.85	108.606	-0.85065	-0.394961	hypothetical protein
XLOC_001301	XLOC_001301	Scaffold_1:2427714-2427903	C	T	OK	689.573	541.653	-0.348335	-0.78257	FIG01226075: hypothetical protein
XLOC_001302	XLOC_001302	Scaffold_1:2428079-2429060	C	T	OK	140.554	179.698	0.354454	1.37332	GMP reductase (EC 1.7.1.7);Ontology_term
XLOC_001303	XLOC_001303	Scaffold_1:2430621-2431482	C	T	OK	121.315	168.526	0.474207	1.72972	DegV family protein
XLOC_001304	XLOC_001304	Scaffold_1:2432070-2432193	C	T	OK	474.274	0	#NAME?	#NAME?	hypothetical protein
XLOC_001305	XLOC_001305	Scaffold_1:2433239-2433731	C	T	OK	188.394	181.803	-0.0513799	-0.173041	FIG001943: hypothetical protein YajQ
XLOC_001306	XLOC_001306	Scaffold_1:2433998-2439237	C	T	OK	691.824	730.88	0.0792311	0.356483	5%2C10-methylenetetrahydrofolate reductase (EC 1.5.1.20) / Homolog of homocysteine-binding domain;Ontology_term
XLOC_001307	XLOC_001307	Scaffold_1:2440385-2441219	C	T	OK	363.469	332.247	-0.129575	-0.550742	3-oxoacyl-[acyl-carrier protein] reductase (EC 1.1.1.100);Ontology_term
XLOC_001308	XLOC_001308	Scaffold_1:2441392-2441833	C	T	OK	260.673	271.69	0.0597212	0.207773	acetyltransferase%2C GNAT family
XLOC_001309	XLOC_001309	Scaffold_1:2452011-2452638	C	T	OK	449.341	467.878	0.0583214	0.234935	Transporter%2C LysE family
XLOC_001310	XLOC_001310	Scaffold_1:2452741-2454211	C	T	OK	227.63	249.064	0.129825	0.574336	Spore germination protein GerKA
XLOC_001311	XLOC_001311	Scaffold_1:2454217-2456534	C	T	OK	647.914	673.435	0.055737	0.25766	hypothetical protein
XLOC_001312	XLOC_001312	Scaffold_1:2459453-2461779	C	T	OK	164.986	178.085	0.110223	0.294936	Multi antimicrobial extrusion protein (Na(+)/drug antiporter)%2C MATE family of MDR efflux pumps
XLOC_001313	XLOC_001313	Scaffold_1:2461981-2462323	C	T	OK	114.588	115.764	0.0147314	0.0414509	Nitrogen regulatory protein P-II
XLOC_001314	XLOC_001314	Scaffold_1:2462379-2463759	C	T	OK	68.655	90.6794	0.40141	1.51294	Ammonium transporter
XLOC_001315	XLOC_001315	Scaffold_1:2465875-2466442	C	T	OK	180.731	209.265	0.211489	0.751139	Uncharacterized protein yisN%2C only in Bacillus
XLOC_001316	XLOC_001316	Scaffold_1:2470575-2471664	C	T	OK	379.373	446.19	0.234044	1.05553	Inner spore coat protein H
XLOC_001317	XLOC_001317	Scaffold_1:2471823-2472009	C	T	OK	184.918	274.345	0.569108	0.909099	YisI
XLOC_001318	XLOC_001318	Scaffold_1:2472570-2472792	C	T	OK	479.14	413.893	-0.211187	-0.588406	Protein GerPA%2C required for proper assembly of spore coat%2C mutations lead to super-dormant spore
XLOC_001319	XLOC_001319	Scaffold_1:2472804-2473050	C	T	OK	477.73	630.538	0.400387	1.18676	Protein GerPB%2C required for proper assembly of spore coat%2C mutations lead to super-dormant spore
XLOC_001320	XLOC_001320	Scaffold_1:2473068-2473683	C	T	OK	375.19	399.148	0.0893023	0.354572	Protein GerPC%2C required for proper assembly of spore coat%2C mutations lead to super-dormant spore
XLOC_001321	XLOC_001321	Scaffold_1:2473858-2474242	C	T	OK	168.643	196.455	0.220226	0.713769	Protein GerPE%2C required for proper assembly of spore coat%2C mutations lead to super-dormant spore
XLOC_001322	XLOC_001322	Scaffold_1:2474297-2474516	C	T	OK	210.177	223.26	0.0871185	0.195999	Protein GerPF%2C required for proper assembly of spore coat%2C mutations lead to super-dormant spore
XLOC_001323	XLOC_001323	Scaffold_1:2488147-2488588	C	T	OK	128.046	123.574	-0.0512821	-0.160689	FIG01242516: hypothetical protein
XLOC_001324	XLOC_001324	Scaffold_1:2488668-2490707	C	T	OK	632.427	685.678	0.116631	0.499566	DNA-binding response regulator
XLOC_001325	XLOC_001325	Scaffold_1:2490790-2492026	C	T	OK	395.561	452.768	0.194871	0.910884	hypothetical protein
XLOC_001326	XLOC_001326	Scaffold_1:2493925-2495128	C	T	OK	259.661	281.086	0.114381	0.505612	YhjO
XLOC_001327	XLOC_001327	Scaffold_1:2495202-2496822	C	T	OK	230.278	269.626	0.227581	1.0423	Long-chain-fatty-acid--CoA ligase (EC 6.2.1.3) / Acetoacetyl-CoA synthetase [leucine] (EC 6.2.1.16);Ontology_term
XLOC_001328	XLOC_001328	Scaffold_1:2498169-2499324	C	T	OK	135.243	165.128	0.288028	1.14162	FIG01236273: hypothetical protein
XLOC_001329	XLOC_001329	Scaffold_1:2506510-2506856	C	T	OK	25.6	60.4154	1.23877	0.361716	hypothetical protein
XLOC_001330	XLOC_001330	Scaffold_1:2519804-2521418	C	T	OK	117.671	139.699	0.247566	0.959946	Transcriptional regulatory protein
XLOC_001331	XLOC_001331	Scaffold_1:2523124-2524900	C	T	OK	317.786	342.878	0.10964	0.51545	FIG01236687: hypothetical protein
XLOC_001332	XLOC_001332	Scaffold_1:2525028-2527316	C	T	OK	731.144	755.091	0.0464945	0.0899893	YhjD
XLOC_001333	XLOC_001333	Scaffold_1:2527588-2527822	C	T	OK	90.5564	125.173	0.467034	0.91615	unknown
XLOC_001334	XLOC_001334	Scaffold_1:2527890-2528857	C	T	OK	991.135	0	#NAME?	#NAME?	hypothetical protein
XLOC_001335	XLOC_001335	Scaffold_1:2528889-2530419	C	T	OK	316.526	343.233	0.116863	0.543046	Probable oxidoreductase%2C with Rieske iron-sulfur protein 2Fe-2S subunit
XLOC_001336	XLOC_001336	Scaffold_1:2530525-2531818	C	T	OK	165.533	181.642	0.133975	0.548806	methyl-accepting chemotaxis protein
XLOC_001337	XLOC_001337	Scaffold_1:2532109-2534733	C	T	OK	224.851	310.659	0.466362	1.02899	Predicted broad substrate specificity phosphatase
XLOC_001338	XLOC_001338	Scaffold_1:2537475-2538615	C	T	OK	276.346	323.477	0.227187	1.0039	Subtilisin Carlsberg precursor (EC 3.4.21.62);Ontology_term
XLOC_001339	XLOC_001339	Scaffold_1:2541691-2543704	C	T	OK	74.6516	107.625	0.527774	0.373959	FIG01237402: hypothetical protein
XLOC_001340	XLOC_001340	Scaffold_1:2545729-2545864	C	T	OK	178.599	386.639	1.11426	0.554837	unknown
XLOC_001341	XLOC_001341	Scaffold_1:2546014-2546140	C	T	OK	462.371	483.835	0.0654664	0.0408147	hypothetical protein
XLOC_001342	XLOC_001342	Scaffold_1:2546171-2547458	C	T	OK	341.953	373.469	0.12719	0.574991	Glutamate-aspartate carrier protein
XLOC_001343	XLOC_001343	Scaffold_1:2547613-2547811	C	T	OK	1973.75	2194.59	0.153014	0.471266	FIG01234550: hypothetical protein
XLOC_001344	XLOC_001344	Scaffold_1:2549033-2550029	C	T	OK	420.955	448.506	0.0914605	0.414775	3-oxoacyl-[acyl-carrier-protein] synthase%2C KASIII (EC 2.3.1.180);Ontology_term
XLOC_001345	XLOC_001345	Scaffold_1:2558985-2559489	C	T	OK	103.301	143.436	0.473558	1.53287	Uncharacterized protein%2C homolog of B.subtilis yhgC
XLOC_001346	XLOC_001346	Scaffold_1:2559596-2560973	C	T	OK	178.536	236.682	0.406733	1.80071	unknown
XLOC_001347	XLOC_001347	Scaffold_1:2561053-2562274	C	T	OK	163.713	185.104	0.177175	0.741961	Catalyzes the cleavage of p-aminobenzoyl-glutamate to p-aminobenzoate and glutamate%2C subunit A
XLOC_001348	XLOC_001348	Scaffold_1:2565547-2565967	C	T	OK	188.525	203.074	0.107251	0.346718	Histidine triad (HIT) nucleotide-binding protein%2C similarity with At5g48545 and yeast YDL125C (HNT1)
XLOC_001349	XLOC_001349	Scaffold_1:2566117-2567239	C	T	OK	303.924	357.144	0.232794	1.05351	Phosphoserine aminotransferase (EC 2.6.1.52);Ontology_term
XLOC_001350	XLOC_001350	Scaffold_1:2567383-2567911	C	T	OK	368.986	419.386	0.184715	0.693603	Substrate-specific component TrpP of tryptophan ECF transporter
XLOC_001351	XLOC_001351	Scaffold_1:2568355-2568712	C	T	OK	823.397	717.315	-0.198981	-0.742729	Hypothetical protein SAV1839
XLOC_001352	XLOC_001352	Scaffold_1:2568905-2569870	C	T	OK	175.343	169.571	-0.04829	-0.154106	Protease production regulatory protein Hpr (ScoC)
XLOC_001353	XLOC_001353	Scaffold_1:2570083-2570599	C	T	OK	143.77	152.256	0.08274	0.27073	Hypothetical protein SAV1840
XLOC_001354	XLOC_001354	Scaffold_1:2570677-2570893	C	T	OK	137.555	142.278	0.0487051	0.113755	FIG01227217: hypothetical protein
XLOC_001355	XLOC_001355	Scaffold_1:2571423-2572284	C	T	OK	250.333	254.867	0.0258984	0.101624	Foldase protein PrsA precursor (EC 5.2.1.8) @ Foldase clustered with pyrimidine conversion;Ontology_term
XLOC_001356	XLOC_001356	Scaffold_1:2580231-2580417	C	T	OK	358.917	229.527	-0.644985	-1.11495	FIG01230527: hypothetical protein
XLOC_001357	XLOC_001357	Scaffold_1:2583514-2584012	C	T	OK	176.493	190.037	0.106666	0.364655	trkA domain protein
XLOC_001358	XLOC_001358	Scaffold_1:2584018-2585230	C	T	OK	324.779	329.51	0.0208659	0.0947327	Na+/H+ antiporter
XLOC_001359	XLOC_001359	Scaffold_1:2587901-2588158	C	T	OK	439.71	0	#NAME?	#NAME?	hypothetical protein
XLOC_001360	XLOC_001360	Scaffold_1:2590206-2592647	C	T	OK	659.609	648.049	-0.0255082	-0.11704	FIG01225774: hypothetical protein
XLOC_001361	XLOC_001361	Scaffold_1:2592800-2593010	C	T	OK	362.672	366.759	0.0161658	0.0367239	FIG01231959: hypothetical protein
XLOC_001362	XLOC_001362	Scaffold_1:2593028-2593910	C	T	OK	254.789	234.574	-0.119256	-0.474161	Fis-type helix-turn-helix domain protein
XLOC_001363	XLOC_001363	Scaffold_1:2594025-2595132	C	T	OK	475.983	454.363	-0.0670664	-0.308968	Multiple sugar ABC transporter%2C ATP-binding protein
XLOC_001364	XLOC_001364	Scaffold_1:2595640-2595844	C	T	OK	112.373	53.537	-1.06969	-1.32517	Small acid-soluble spore protein%2C beta-type SASP
XLOC_001365	XLOC_001365	Scaffold_1:2595917-2596158	C	T	OK	79.1336	176.907	1.16063	0.577924	hypothetical protein
XLOC_001366	XLOC_001366	Scaffold_1:2596178-2596805	C	T	OK	275.102	285.685	0.0544583	0.209763	Flavohemoprotein (Hemoglobin-like protein) (Flavohemoglobin) (Nitric oxide dioxygenase) (EC 1.14.12.17);Ontology_term
XLOC_001367	XLOC_001367	Scaffold_1:2601108-2601618	C	T	OK	142.08	220.498	0.634062	2.18356	Stress response protein nhaX
XLOC_001368	XLOC_001368	Scaffold_1:2602721-2606512	C	T	OK	246.966	340.761	0.464447	2.14584	FIG01225897: hypothetical protein
XLOC_001369	XLOC_001369	Scaffold_1:2606589-2607066	C	T	OK	111.521	190.432	0.771958	2.58727	FIG01246923: hypothetical protein
XLOC_001370	XLOC_001370	Scaffold_1:2608299-2609658	C	T	OK	77.9359	121.649	0.642363	2.4599	Na+/H+ antiporter NhaC
XLOC_001371	XLOC_001371	Scaffold_1:2610842-2611754	C	T	OK	163.5	204.82	0.325067	1.22807	polysaccharide deacetylase
XLOC_001372	XLOC_001372	Scaffold_1:2611888-2612383	C	T	OK	228.797	212.95	-0.103554	-0.362441	acetyltransferase%2C GNAT family
XLOC_001373	XLOC_001373	Scaffold_1:2614589-2616401	C	T	OK	691.967	664.427	-0.0585928	-0.138217	Glycerophosphoryl diester phosphodiesterase (EC 3.1.4.46);Ontology_term
XLOC_001374	XLOC_001374	Scaffold_1:2617407-2617560	C	T	OK	94.9943	110.796	0.221993	0.138401	hypothetical protein
XLOC_001375	XLOC_001375	Scaffold_1:2619765-2620191	C	T	OK	219.834	289.701	0.398145	1.36506	HTH-type transcriptional regulator cueR
XLOC_001376	XLOC_001376	Scaffold_1:2620266-2621574	C	T	OK	180.37	163.716	-0.139767	-0.569537	Magnesium and cobalt efflux protein CorC
XLOC_001377	XLOC_001377	Scaffold_1:2621704-2623575	C	T	OK	681.028	692.759	0.0246407	0.094755	Transcriptional regulator%2C TetR family
XLOC_001378	XLOC_001378	Scaffold_1:2625948-2626631	C	T	OK	762.479	664.667	-0.198065	-0.817387	Mannose-6-phosphate isomerase (EC 5.3.1.8);Ontology_term
XLOC_001379	XLOC_001379	Scaffold_1:2626779-2628612	C	T	OK	909.132	916.01	0.010874	0.0313469	RNA polymerase sigma-70 factor
XLOC_001380	XLOC_001380	Scaffold_1:2629187-2630597	C	T	OK	397.478	389.349	-0.0298112	-0.14027	Predicted transcriptional regulator of pyridoxine metabolism
XLOC_001381	XLOC_001381	Scaffold_1:2630674-2631556	C	T	OK	559.758	540.337	-0.0509453	-0.231661	Transcriptional regulator%2C AraC family
XLOC_001382	XLOC_001382	Scaffold_1:2632287-2633877	C	T	OK	261.241	250.684	-0.0595167	-0.264629	Putative toxin component near putative ESAT-related proteins%2C repetitive / Repetitive hypothetical protein near ESAT cluster%2C SA0282 homolog
XLOC_001383	XLOC_001383	Scaffold_1:2633884-2634298	C	T	OK	22.626	20.679	-0.129814	-0.250335	hypothetical protein
XLOC_001384	XLOC_001384	Scaffold_1:2637787-2638742	C	T	NOTEST	0	0	0	0	hypothetical protein
XLOC_001385	XLOC_001385	Scaffold_1:2641212-2642091	C	T	OK	277.422	234.621	-0.241751	-0.982547	negative regulation of the citrate synthase I gene (citA)
XLOC_001386	XLOC_001386	Scaffold_1:2646338-2646770	C	T	OK	156.575	139.207	-0.169621	-0.537539	Nitrite-sensitive transcriptional repressor NsrR
XLOC_001387	XLOC_001387	Scaffold_1:2647326-2647575	C	T	OK	62.1831	38.5347	-0.690365	-1.1205	FIG01225983: hypothetical protein
XLOC_001388	XLOC_001388	Scaffold_1:2652615-2652738	C	T	OK	464.988	0	#NAME?	#NAME?	hypothetical protein
XLOC_001389	XLOC_001389	Scaffold_1:2657895-2658888	C	T	OK	861.395	778.773	-0.145473	-0.693928	Alcohol dehydrogenase (EC 1.1.1.1);Ontology_term
XLOC_001390	XLOC_001390	Scaffold_1:2667020-2667938	C	T	OK	485.195	438.209	-0.146945	-0.674918	Similar to ribosomal large subunit pseudouridine synthase D%2C Bacillus subtilis YhcT type
XLOC_001391	XLOC_001391	Scaffold_1:2674338-2674766	C	T	OK	523.984	573.379	0.129966	0.295299	hypothetical protein
XLOC_001392	XLOC_001392	Scaffold_1:2674978-2676515	C	T	OK	665.683	740.386	0.153442	0.511166	FIG01226141: hypothetical protein
XLOC_001393	XLOC_001393	Scaffold_1:2677336-2678740	C	T	OK	360.248	369.548	0.0367738	0.170332	acylamino-acid-releasing enzyme
XLOC_001394	XLOC_001394	Scaffold_1:2678813-2679128	C	T	OK	143.038	109.05	-0.3914	-1.11044	acylamino-acid-releasing enzyme
XLOC_001395	XLOC_001395	Scaffold_1:2679175-2679517	C	T	OK	362.62	385.072	0.0866715	0.293246	FIG01229373: hypothetical protein
XLOC_001396	XLOC_001396	Scaffold_1:2684085-2686260	C	T	OK	33.1952	28.6476	-0.212562	-0.0295068	Cold shock protein CspD
XLOC_001397	XLOC_001397	Scaffold_1:2692280-2692460	C	T	OK	1053.73	948.381	-0.151965	-0.406279	hypothetical protein
XLOC_001398	XLOC_001398	Scaffold_1:2692672-2692987	C	T	OK	644.047	559.808	-0.202235	-0.692129	hypothetical protein
XLOC_001399	XLOC_001399	Scaffold_1:2692991-2693607	C	T	OK	173.638	165.59	-0.0684665	-0.184209	hypothetical protein
XLOC_001400	XLOC_001400	Scaffold_1:2693618-2695949	C	T	OK	504.998	483.849	-0.0617191	-0.295289	Ribonucleotide reductase of class Ia (aerobic)%2C alpha subunit (EC 1.17.4.1);Ontology_term
XLOC_001401	XLOC_001401	Scaffold_1:2696022-2697063	C	T	OK	356.669	355.321	-0.00546332	-0.0233623	Ribonucleotide reductase of class Ia (aerobic)%2C beta subunit (EC 1.17.4.1);Ontology_term
XLOC_001402	XLOC_001402	Scaffold_1:2697171-2698122	C	T	OK	724.294	647.942	-0.160712	-0.745512	hypothetical protein
XLOC_001403	XLOC_001403	Scaffold_1:2698433-2699435	C	T	OK	192.252	208.501	0.117054	0.450721	hypothetical protein
XLOC_001404	XLOC_001404	Scaffold_1:2700430-2701273	C	T	OK	558.811	516.968	-0.112287	-0.504017	Phosphate starvation-inducible protein PhoH%2C predicted ATPase
XLOC_001405	XLOC_001405	Scaffold_1:2701331-2701775	C	T	OK	266.039	271.541	0.0295299	0.0987444	hypothetical protein
XLOC_001406	XLOC_001406	Scaffold_1:2701839-2702124	C	T	OK	1033.63	909.824	-0.184063	-0.668386	hypothetical protein
XLOC_001407	XLOC_001407	Scaffold_1:2702858-2703551	C	T	OK	356.201	333.072	-0.0968554	-0.377879	RNA polymerase sporulation specific sigma factor SigF
XLOC_001408	XLOC_001408	Scaffold_1:2703763-2705453	C	T	OK	854.51	869.112	0.0244455	0.0767265	hypothetical protein
XLOC_001409	XLOC_001409	Scaffold_1:2705508-2705688	C	T	OK	64.2071	0	#NAME?	#NAME?	hypothetical protein
XLOC_001410	XLOC_001410	Scaffold_1:2705690-2706701	C	T	OK	612.202	602.516	-0.0230079	-0.107988	DNA primase (EC 2.7.7.-);Ontology_term
XLOC_001411	XLOC_001411	Scaffold_1:2706716-2706899	C	T	OK	93.5974	327.938	1.80888	2.09214	hypothetical protein
XLOC_001412	XLOC_001412	Scaffold_1:2706977-2707709	C	T	OK	394.709	315.088	-0.325037	-1.32144	hypothetical protein
XLOC_001413	XLOC_001413	Scaffold_1:2708221-2709070	C	T	OK	769.208	747.848	-0.0406277	-0.189509	Thymidylate synthase (EC 2.1.1.45);Ontology_term
XLOC_001414	XLOC_001414	Scaffold_1:2709234-2709618	C	T	OK	164.174	185.937	0.179589	0.578011	hypothetical protein
XLOC_001415	XLOC_001415	Scaffold_1:2740918-2741035	C	T	OK	0	1162.62	inf	#NAME?	hypothetical protein
XLOC_001416	XLOC_001416	Scaffold_1:2751092-2751441	C	T	OK	84.1009	74.8716	-0.167702	-0.111829	hypothetical protein
XLOC_001417	XLOC_001417	Scaffold_1:2756100-2757222	C	T	OK	374.224	402.504	0.105101	0.471081	response regulator aspartate phosphatase
XLOC_001418	XLOC_001418	Scaffold_1:2757512-2757632	C	T	OK	0	620.778	inf	#NAME?	hypothetical protein
XLOC_001419	XLOC_001419	Scaffold_1:2760854-2761310	C	T	OK	302.408	330.709	0.129068	0.445139	hypothetical protein
XLOC_001420	XLOC_001420	Scaffold_1:2761414-2761759	C	T	OK	122.306	184.084	0.589873	1.71972	hypothetical protein
XLOC_001421	XLOC_001421	Scaffold_1:2761836-2762037	C	T	OK	50.0873	35.3502	-0.502725	-0.538584	hypothetical protein
XLOC_001422	XLOC_001422	Scaffold_1:2762138-2762429	C	T	OK	97.6918	105.743	0.114254	0.281322	hypothetical protein
XLOC_001423	XLOC_001423	Scaffold_1:2762430-2762934	C	T	OK	406.366	516.814	0.346866	1.30916	hypothetical protein
XLOC_001424	XLOC_001424	Scaffold_1:2762945-2763185	C	T	OK	115.823	115.097	-0.00907514	-0.0185357	hypothetical protein
XLOC_001425	XLOC_001425	Scaffold_1:2763211-2763827	C	T	OK	379.814	429.045	0.175836	0.667147	hypothetical protein
XLOC_001426	XLOC_001426	Scaffold_1:2763844-2764042	C	T	OK	209.49	108.588	-0.948021	-1.36827	hypothetical protein
XLOC_001427	XLOC_001427	Scaffold_1:2766353-2766500	C	T	OK	238.695	269.337	0.174239	0.153624	hypothetical protein
XLOC_001428	XLOC_001428	Scaffold_1:2766592-2766913	C	T	OK	507.538	416.082	-0.286647	-0.953486	hypothetical protein
XLOC_001429	XLOC_001429	Scaffold_1:2766917-2767100	C	T	OK	609.052	546.655	-0.155934	-0.336247	hypothetical protein
XLOC_001430	XLOC_001430	Scaffold_1:2767555-2768440	C	T	OK	429.688	441.903	0.0404393	0.176551	Integrase
XLOC_001431	XLOC_001431	Scaffold_1:2768579-2768750	C	T	OK	2733.38	2966.28	0.117967	0.370724	hypothetical protein
XLOC_001432	XLOC_001432	Scaffold_1:2768921-2770514	C	T	OK	312.911	308.154	-0.022105	-0.101119	putative site-specific recombinase
XLOC_001433	XLOC_001433	Scaffold_1:2778750-2779380	C	T	OK	393.381	422.331	0.102448	0.410062	FIG01227611: hypothetical protein
XLOC_001434	XLOC_001434	Scaffold_1:2784310-2784972	C	T	OK	425.811	480.524	0.174393	0.402106	HigA protein (antitoxin to HigB)
XLOC_001435	XLOC_001435	Scaffold_1:2792662-2793178	C	T	OK	283.341	275.181	-0.042155	-0.149068	hypothetical protein
XLOC_001436	XLOC_001436	Scaffold_1:2798505-2798820	C	T	OK	44.1016	34.8459	-0.339843	-0.634376	hypothetical protein
XLOC_001437	XLOC_001437	Scaffold_1:2799283-2800096	C	T	OK	226.68	212.635	-0.0922773	-0.333672	hypothetical protein
XLOC_001438	XLOC_001438	Scaffold_1:2800185-2800554	C	T	OK	385.499	332.085	-0.215174	-0.746475	YOLD protein
XLOC_001439	XLOC_001439	Scaffold_1:2802153-2803677	C	T	OK	322.709	327.484	0.021192	0.0976012	Putative toxin component near putative ESAT-related proteins%2C repetitive / Repetitive hypothetical protein near ESAT cluster%2C SA0282 homolog
XLOC_001440	XLOC_001440	Scaffold_1:2836573-2836696	C	T	NOTEST	0	0	0	0	hypothetical protein
XLOC_001441	XLOC_001441	Scaffold_1:2838368-2838710	C	T	OK	141.247	174.122	0.301877	0.911377	Repressor (CI-like) [Bacteriophage A118]
XLOC_001442	XLOC_001442	Scaffold_1:2838713-2839160	C	T	OK	325.457	276.78	-0.233728	-0.812773	Phage protein
XLOC_001443	XLOC_001443	Scaffold_1:2839174-2840293	C	T	OK	288.512	279.377	-0.0464211	-0.195553	Phage integrase
XLOC_001444	XLOC_001444	Scaffold_1:2848004-2848930	C	T	OK	350.105	362.101	0.0486053	0.206515	CAAX amino terminal protease family protein
XLOC_001445	XLOC_001445	Scaffold_1:2850617-2853196	C	T	OK	456.974	441.504	-0.0496863	-0.229902	ABC transporter ATP-binding protein uup
XLOC_001446	XLOC_001446	Scaffold_1:2879663-2882729	C	T	OK	353.221	365.488	0.0492502	0.236153	FIG01228993: hypothetical protein
XLOC_001447	XLOC_001447	Scaffold_1:2882932-2884105	C	T	OK	390.208	415.741	0.0914408	0.417351	NADH-dependent butanol dehydrogenase A (EC 1.1.1.-);Ontology_term
XLOC_001448	XLOC_001448	Scaffold_1:2885580-2885694	C	T	NOTEST	0	0	0	0	hypothetical protein
XLOC_001449	XLOC_001449	Scaffold_1:2889648-2889768	C	T	OK	621.658	650.119	0.0645837	0.0261512	hypothetical protein
XLOC_001450	XLOC_001450	Scaffold_1:2889845-2890109	C	T	OK	98.1082	94.8535	-0.0486725	-0.111216	Putative uncharacterized protein YraL
XLOC_001451	XLOC_001451	Scaffold_1:2890241-2891066	C	T	OK	404.51	392.994	-0.0416689	-0.184036	abhydrolase%2C alpha/beta hydrolase fold
XLOC_001452	XLOC_001452	Scaffold_1:2891676-2892422	C	T	NOTEST	0	0	0	0	hypothetical protein
XLOC_001453	XLOC_001453	Scaffold_1:2893023-2894406	C	T	OK	556.744	531.047	-0.0681749	-0.32324	D-serine/D-alanine/glycine transporter
XLOC_001454	XLOC_001454	Scaffold_1:2894535-2895318	C	T	OK	679.982	651.18	-0.0624385	-0.287954	Metal-dependent hydrolase
XLOC_001455	XLOC_001455	Scaffold_1:2896702-2897038	C	T	OK	632.73	325.181	-0.960347	-0.776755	hypothetical protein
XLOC_001456	XLOC_001456	Scaffold_1:2897273-2897531	C	T	OK	163.711	181.471	0.148587	0.397209	Transcriptional regulator%2C MarR family%3B Cinnamoyl ester hydrolase
XLOC_001457	XLOC_001457	Scaffold_1:2897615-2898188	C	T	OK	239.119	254.504	0.0899609	0.313152	FIG01233850: hypothetical protein
XLOC_001458	XLOC_001458	Scaffold_1:2899529-2900642	C	T	OK	298.803	285.486	-0.065772	-0.285448	oxidoreductase
XLOC_001459	XLOC_001459	Scaffold_1:2902391-2903306	C	T	OK	491.612	442.33	-0.152398	-0.687368	Arginase (EC 3.5.3.1);Ontology_term
XLOC_001460	XLOC_001460	Scaffold_1:2905320-2905932	C	T	OK	432.893	437.115	0.0140038	0.0563687	membrane protein%2C putative
XLOC_001461	XLOC_001461	Scaffold_1:2907563-2907869	C	T	OK	239.647	200.268	-0.258974	-0.769864	hypothetical protein
XLOC_001462	XLOC_001462	Scaffold_1:2908692-2909694	C	T	OK	632.35	554.653	-0.189136	-0.874945	Putative oxidoreductase SMc00968
XLOC_001463	XLOC_001463	Scaffold_1:2910360-2910837	C	T	OK	295.572	267.952	-0.141537	-0.499874	CarD-like transcriptional regulator
XLOC_001464	XLOC_001464	Scaffold_1:2912594-2913623	C	T	OK	375.051	327.996	-0.193408	-0.83626	Delta5 acyl-lipid desaturase (EC 1.14.99.-);Ontology_term
XLOC_001465	XLOC_001465	Scaffold_1:2914253-2914412	C	T	OK	0	101.156	inf	#NAME?	hypothetical protein
XLOC_001466	XLOC_001466	Scaffold_1:2915823-2915970	C	T	OK	1272.18	1100.4	-0.209281	-0.3456	ATP-dependent DNA ligase (EC 6.5.1.1);Ontology_term
XLOC_001467	XLOC_001467	Scaffold_1:2916569-2916725	C	T	OK	69.3584	161.638	1.22063	0.859559	hypothetical protein
XLOC_001468	XLOC_001468	Scaffold_1:2918408-2918903	C	T	OK	53.3597	62.9579	0.238637	0.651525	phage integrase
XLOC_001469	XLOC_001469	Scaffold_1:2920579-2923835	C	T	OK	295.098	118.166	-1.32038	-0.147858	hypothetical protein
XLOC_001470	XLOC_001470	Scaffold_1:2924616-2925174	C	T	OK	266.048	205.051	-0.375702	-1.32038	Transcriptional regulator%2C TetR family
XLOC_001471	XLOC_001471	Scaffold_1:2935856-2938406	C	T	OK	1061.37	876.431	-0.276212	-0.792578	GlpG protein (membrane protein of glp regulon)
XLOC_001472	XLOC_001472	Scaffold_1:2943837-2944158	C	T	OK	144.195	189.519	0.394323	1.12143	Thioredoxin
XLOC_001473	XLOC_001473	Scaffold_1:2944209-2944356	C	T	NOTEST	0	0	0	0	hypothetical protein
XLOC_001474	XLOC_001474	Scaffold_1:2944571-2944730	C	T	OK	199.574	232.86	0.222541	0.224808	hypothetical protein
XLOC_001475	XLOC_001475	Scaffold_1:2944732-2944888	C	T	OK	29.0435	135.921	2.22648	1.19404	Uncharacterized protein ydbN
XLOC_001476	XLOC_001476	Scaffold_1:2951932-2952728	C	T	NOTEST	0	0	0	0	Methionine transporter MetT
XLOC_001477	XLOC_001477	Scaffold_1:2952750-2954040	C	T	OK	369.578	398.56	0.108916	0.507216	Methionine transporter MetT
XLOC_001478	XLOC_001478	Scaffold_1:2955023-2956681	C	T	OK	168.027	227.247	0.435563	0.559379	conserved protein YdaT
XLOC_001479	XLOC_001479	Scaffold_1:2956987-2958409	C	T	OK	404.107	424.107	0.0696902	0.327586	Aspartate ammonia-lyase (EC 4.3.1.1);Ontology_term
XLOC_001480	XLOC_001480	Scaffold_1:2958503-2958764	C	T	OK	607.821	565.297	-0.104639	-0.341295	Integral membrane protein
XLOC_001481	XLOC_001481	Scaffold_1:2958946-2960227	C	T	OK	316.682	316.366	-0.00144123	-0.00653229	Manganese transport protein MntH
XLOC_001482	XLOC_001482	Scaffold_1:2960280-2960832	C	T	OK	398.205	412.869	0.0521735	0.207857	Ribosomal-protein-L7p-serine acetyltransferase
XLOC_001483	XLOC_001483	Scaffold_1:2960903-2961155	C	T	OK	75.6398	75.81	0.00324126	0.00607444	hypothetical protein
XLOC_001484	XLOC_001484	Scaffold_1:2964735-2968104	C	T	OK	1832.69	1762.71	-0.0561656	-0.192511	4-amino%2C 4-deoxychorismate mutase (EC 5.4.99.-);Ontology_term
XLOC_001485	XLOC_001485	Scaffold_1:2971062-2971473	C	T	OK	201.369	189.172	-0.0901414	-0.304112	FIG01248438: hypothetical protein
XLOC_001486	XLOC_001486	Scaffold_1:2971557-2971851	C	T	OK	446.705	383.913	-0.218543	-0.716846	hypothetical protein
XLOC_001487	XLOC_001487	Scaffold_1:2974756-2975140	C	T	OK	265.147	292.609	0.142184	0.487756	FIG01248758: hypothetical protein
XLOC_001488	XLOC_001488	Scaffold_1:2998395-2999076	C	T	OK	418.026	460.862	0.14074	0.576603	predicted biotin regulatory protein BioR (GntR family)
XLOC_001489	XLOC_001489	Scaffold_1:3008272-3008845	C	T	OK	267.351	372.307	0.47776	1.77701	DNA for 25-36 DEGREE region containing the AMYE-SRFA region%2C complete CDS
XLOC_001490	XLOC_001490	Scaffold_1:3008849-3010511	C	T	OK	206.84	238.947	0.208178	0.941365	Copper resistance protein D
XLOC_001491	XLOC_001491	Scaffold_1:3010513-3011158	C	T	OK	269.153	329.927	0.293718	1.13274	Conserved membrane protein in copper uptake%2C YcnI
XLOC_001492	XLOC_001492	Scaffold_1:3011852-3012737	C	T	OK	246.037	292.292	0.248539	1.03185	Permease of the drug/metabolite transporter (DMT) superfamily
XLOC_001493	XLOC_001493	Scaffold_1:3016992-3018423	C	T	OK	123.791	186.636	0.592319	2.49341	Transcriptional regulator GabR of GABA utilization (GntR family with aminotransferase-like domain)
XLOC_001494	XLOC_001494	Scaffold_1:3018961-3019249	C	T	OK	61.623	70.6421	0.197061	0.375316	FIG01231880: hypothetical protein
XLOC_001495	XLOC_001495	Scaffold_1:3019267-3020005	C	T	OK	89.9849	134.721	0.582219	2.02067	Oxygen-insensitive NADPH nitroreductase (EC 1.-.-.-);Ontology_term
XLOC_001496	XLOC_001496	Scaffold_1:3020115-3020958	C	T	OK	118.713	178.524	0.588639	2.17595	Probable carboxyvinyl-carboxyphosphonate phosphorylmutase (EC 2.7.8.23);Ontology_term
XLOC_001497	XLOC_001497	Scaffold_1:3021019-3021940	C	T	OK	151.094	192.254	0.347569	1.29708	TetR family transcriptional regulator probably coupled to RND multidrug efflux transporter
XLOC_001498	XLOC_001498	Scaffold_1:3021951-3023373	C	T	OK	183.72	199.32	0.117578	0.507191	FIG01240554: hypothetical protein
XLOC_001499	XLOC_001499	Scaffold_1:3027439-3028801	C	T	OK	431.627	435.809	0.0139122	0.0649306	Aspartokinase (EC 2.7.2.4);Ontology_term
XLOC_001500	XLOC_001500	Scaffold_1:3028936-3030655	C	T	OK	341.766	358.376	0.068465	0.31624	Methyl-accepting chemotaxis protein
XLOC_001501	XLOC_001501	Scaffold_1:3033007-3034447	C	T	OK	428.739	431.932	0.0107065	0.050018	ABC transporter%2C permease protein
XLOC_001502	XLOC_001502	Scaffold_1:3034462-3035146	C	T	OK	559.412	514.798	-0.119905	-0.517285	ABC transporter ATP-binding protein YvcR
XLOC_001503	XLOC_001503	Scaffold_1:3040068-3040287	C	T	OK	373.724	462.751	0.308263	0.820132	Uncharacterized protein yczF precursor
XLOC_001504	XLOC_001504	Scaffold_1:3042336-3043827	C	T	OK	432.96	413.475	-0.0664345	-0.31221	Di-/tripeptide transporter
XLOC_001505	XLOC_001505	Scaffold_1:3043921-3044380	C	T	OK	565.186	700.502	0.309665	1.26814	BH2119 unknown
XLOC_001506	XLOC_001506	Scaffold_1:3044559-3045705	C	T	OK	367.995	355.758	-0.0487928	-0.220072	3-phytase precursor (EC 3.1.3.8);Ontology_term
XLOC_001507	XLOC_001507	Scaffold_1:3045814-3045940	C	T	OK	1943.73	1148.82	-0.758677	-0.812792	hypothetical protein
XLOC_001508	XLOC_001508	Scaffold_1:3048291-3049209	C	T	OK	415.44	396.867	-0.0659842	-0.295671	Transcriptional regulator%2C MarR family / Acetyltransferase (GNAT)
XLOC_001509	XLOC_001509	Scaffold_1:3049224-3050493	C	T	OK	823.174	738.624	-0.156358	-0.749764	transporter%2C putative
XLOC_001510	XLOC_001510	Scaffold_1:3058953-3059337	C	T	OK	307.359	320.569	0.0607132	0.203335	FIG01251320: hypothetical protein
XLOC_001511	XLOC_001511	Scaffold_1:3059350-3059629	C	T	OK	256.935	324.723	0.33781	0.980188	FIG01243676: hypothetical protein
XLOC_001512	XLOC_001512	Scaffold_1:3059646-3061035	C	T	OK	219.897	228.198	0.0534578	0.225533	Putative toxin component near putative ESAT-related proteins%2C repetitive / Repetitive hypothetical protein near ESAT cluster%2C SA0282 homolog
XLOC_001513	XLOC_001513	Scaffold_1:3061318-3061618	C	T	OK	30.7252	44.578	0.536912	0.969419	BH2522 unknown conserved protein
XLOC_001514	XLOC_001514	Scaffold_1:3062750-3062909	C	T	OK	0	46.1894	inf	#NAME?	hypothetical protein
XLOC_001515	XLOC_001515	Scaffold_1:3062951-3063110	C	T	OK	121.251	46.7739	-1.37423	-0.674428	hypothetical protein
XLOC_001516	XLOC_001516	Scaffold_1:3063274-3063436	C	T	OK	56.9884	0	#NAME?	#NAME?	hypothetical protein
XLOC_001517	XLOC_001517	Scaffold_1:3063544-3064385	C	T	OK	103.702	126.385	0.285389	0.978829	FIG01233855: hypothetical protein
XLOC_001518	XLOC_001518	Scaffold_1:3064451-3064709	C	T	OK	44.4393	20.2804	-1.13175	-1.42773	FIG01241346: hypothetical protein
XLOC_001519	XLOC_001519	Scaffold_1:3064726-3065407	C	T	OK	399.923	381.976	-0.0662388	-0.26202	FIG01233855: hypothetical protein
XLOC_001520	XLOC_001520	Scaffold_1:3065427-3065874	C	T	OK	294.987	299.82	0.0234492	0.0800162	FIG01244845: hypothetical protein
XLOC_001521	XLOC_001521	Scaffold_1:3065944-3066286	C	T	OK	98.5729	108.12	0.133372	0.350839	FIG01247715: hypothetical protein
XLOC_001522	XLOC_001522	Scaffold_1:3066311-3066758	C	T	OK	258.637	246.766	-0.0677861	-0.228295	FIG01244845: hypothetical protein
XLOC_001523	XLOC_001523	Scaffold_1:3069637-3070510	C	T	OK	530.537	474.392	-0.161373	-0.740796	Transcriptional regulator%2C LysR family
XLOC_001524	XLOC_001524	Scaffold_1:3074431-3075919	C	T	OK	602.926	563.375	-0.0978856	-0.467072	Arginine utilization regulatory protein RocR
XLOC_001525	XLOC_001525	Scaffold_1:3076034-3077532	C	T	OK	768.393	741.287	-0.051812	-0.235035	L-Cystine ABC transporter%2C periplasmic cystine-binding protein TcyA
XLOC_001526	XLOC_001526	Scaffold_1:3077547-3078291	C	T	OK	294.811	301.198	0.0309198	0.12328	L-Cystine ABC transporter%2C ATP-binding protein TcyC
XLOC_001527	XLOC_001527	Scaffold_1:3081968-3082217	C	T	OK	228.95	173.605	-0.399229	-0.959281	hypothetical protein
XLOC_001528	XLOC_001528	Scaffold_1:3082779-3083442	C	T	OK	627.63	595.449	-0.075938	-0.339491	membrane protein%2C putative
XLOC_001529	XLOC_001529	Scaffold_1:3085263-3085944	C	T	OK	276.957	299.728	0.113991	0.451965	4'-phosphopantetheinyl transferase (EC 2.7.8.-);Ontology_term
XLOC_001530	XLOC_001530	Scaffold_1:3087440-3088352	C	T	OK	398.02	416.225	0.0645232	0.285291	Permease of the drug/metabolite transporter (DMT) superfamily
XLOC_001531	XLOC_001531	Scaffold_1:3100025-3100622	C	T	OK	279.68	324.096	0.212647	0.780043	hypothetical protein
XLOC_001532	XLOC_001532	Scaffold_1:3112882-3113623	C	T	OK	414.081	467.696	0.175658	0.730975	FIG01226826: hypothetical protein
XLOC_001533	XLOC_001533	Scaffold_1:3115228-3115675	C	T	OK	360.146	406.696	0.175368	0.619275	competence-specific nuclease
XLOC_001534	XLOC_001534	Scaffold_1:3115692-3116091	C	T	OK	453.206	452.269	-0.00298643	-0.0107977	Nin
XLOC_001535	XLOC_001535	Scaffold_1:3119192-3120068	C	T	OK	473.926	450.208	-0.0740705	-0.325008	Lysine-arginine-ornithine-binding periplasmic protein precursor (TC 3.A.1.3.1)
XLOC_001536	XLOC_001536	Scaffold_1:3120079-3120763	C	T	OK	737.907	780.834	0.081578	0.368113	Probable amino-acid ABC transporter permease protein yckA
XLOC_001537	XLOC_001537	Scaffold_1:3121257-3121623	C	T	OK	700.912	664.975	-0.0759345	-0.27876	FIG01249300: hypothetical protein
XLOC_001538	XLOC_001538	Scaffold_1:3123715-3124603	C	T	OK	419.716	459.884	0.131858	0.595352	possible permease
XLOC_001539	XLOC_001539	Scaffold_1:3124607-3125453	C	T	OK	242.199	252.227	0.0585294	0.227394	DUF1980 domain-containing protein
XLOC_001540	XLOC_001540	Scaffold_1:3132146-3132323	C	T	OK	74.2661	89.5216	0.269532	0.248587	hypothetical protein
XLOC_001541	XLOC_001541	Scaffold_1:3134007-3135342	C	T	OK	330.133	398.048	0.269893	1.24927	S-methylmethionine permease
XLOC_001542	XLOC_001542	Scaffold_1:3139172-3140378	C	T	OK	365.192	396.901	0.120123	0.558978	Nitrate/nitrite transporter
XLOC_001543	XLOC_001543	Scaffold_1:3148944-3149986	C	T	OK	585.215	618.223	0.0791605	0.307356	Transcriptional regulator%2C PadR family
XLOC_001544	XLOC_001544	Scaffold_1:3152775-3154472	C	T	OK	752.472	682.414	-0.140992	-0.647106	ABC transporter%2C ATP-binding protein
XLOC_001545	XLOC_001545	Scaffold_1:3156167-3157160	C	T	OK	651.851	627.762	-0.0543253	-0.255652	FIG01232463: hypothetical protein
XLOC_001546	XLOC_001546	Scaffold_1:3157689-3158641	C	T	OK	565.035	899.582	0.670914	0.197591	Thiosulfate sulfurtransferase%2C rhodanese (EC 2.8.1.1);Ontology_term
XLOC_001547	XLOC_001547	Scaffold_1:3162111-3163062	C	T	OK	563.947	515.3	-0.130147	-0.594603	Glutamyl endopeptidase precursor (EC 3.4.21.19)%2C blaSE;Ontology_term
XLOC_001548	XLOC_001548	Scaffold_1:3169118-3171726	C	T	OK	1264.35	1279.82	0.0175406	0.0851441	6-phospho-beta-glucosidase (EC 3.2.1.86);Ontology_term
XLOC_001549	XLOC_001549	Scaffold_1:3171742-3172374	C	T	OK	725.82	831.572	0.19623	0.693224	PTS system%2C lichenan-%2C cellobiose-specific IIA component (EC 2.7.1.69)%3B PTS system%2C cellobiose-specific IIC component (EC 2.7.1.69);Ontology_term
XLOC_001550	XLOC_001550	Scaffold_1:3172495-3175227	C	T	OK	726.364	785.814	0.113497	0.541582	Glycolate dehydrogenase (EC 1.1.99.14)%2C subunit GlcD;Ontology_term
XLOC_001551	XLOC_001551	Scaffold_1:3177172-3177442	C	T	OK	206.449	216.825	0.0707497	0.203214	FIG01230401: hypothetical protein
XLOC_001552	XLOC_001552	Scaffold_1:3177553-3179389	C	T	OK	303.653	327.443	0.108818	0.511406	Oligoendopeptidase F (EC 3.4.24.-);Ontology_term
XLOC_001553	XLOC_001553	Scaffold_1:3181011-3181464	C	T	OK	319.693	284.321	-0.169167	-0.599949	GCN5-related N-acetyltransferase
XLOC_001554	XLOC_001554	Scaffold_1:3184094-3185495	C	T	OK	432.533	435.104	0.00854984	0.0400318	Arginine/ornithine antiporter ArcD
XLOC_001555	XLOC_001555	Scaffold_1:3186113-3187190	C	T	OK	128.254	158.063	0.301493	1.11367	FIG01232969: hypothetical protein
XLOC_001556	XLOC_001556	Scaffold_1:3190622-3191522	C	T	OK	739.247	722.49	-0.0330784	-0.155764	Chromosome initiation inhibitor
XLOC_001557	XLOC_001557	Scaffold_1:3197443-3197578	C	T	OK	0	328.123	inf	#NAME?	FIG01238137: hypothetical protein
XLOC_001558	XLOC_001558	Scaffold_1:3206119-3206668	C	T	OK	345.836	408.489	0.240209	0.899142	Transcriptional regulator%2C MarR family
XLOC_001559	XLOC_001559	Scaffold_1:3230423-3230810	C	T	OK	64.7416	62.0436	-0.0614094	-0.154386	Beta-lactamase repressor BlaI
XLOC_001560	XLOC_001560	Scaffold_1:3230811-3232617	C	T	OK	215.674	229.446	0.0893078	0.402199	Beta-lactamase regulatory sensor-transducer BlaR1
XLOC_001561	XLOC_001561	Scaffold_1:3232710-3233247	C	T	OK	252.472	248.367	-0.0236546	-0.0847096	Ribosomal-protein-alanine acetyltransferase (EC 2.3.1.128);Ontology_term
XLOC_001562	XLOC_001562	Scaffold_1:3235948-3236932	C	T	OK	267.581	241.106	-0.150309	-0.625379	Glutaminase (EC 3.5.1.2);Ontology_term
XLOC_001563	XLOC_001563	Scaffold_1:3236955-3238386	C	T	OK	577.727	548.087	-0.0759835	-0.359597	Sodium/glutamine symporter glnT
XLOC_001564	XLOC_001564	Scaffold_1:3238518-3238917	C	T	OK	158.046	219.629	0.474729	1.5751	putative membrane protein
XLOC_001565	XLOC_001565	Scaffold_1:3239830-3241251	C	T	OK	658.477	656.786	-0.0037101	-0.0167638	Carbonic anhydrase( EC:4.2.1.1 );Ontology_term
XLOC_001566	XLOC_001566	Scaffold_1:3244506-3246908	C	T	OK	658.65	703.409	0.0948529	0.428136	Homocysteine S-methyltransferase (EC 2.1.1.10);Ontology_term
XLOC_001567	XLOC_001567	Scaffold_1:3246934-3247315	C	T	OK	607.957	601.264	-0.0159709	-0.0574658	FIG01245312: hypothetical protein
XLOC_001568	XLOC_001568	Scaffold_1:3248516-3249344	C	T	OK	505.56	503.938	-0.00463589	-0.0209791	Beta-galactosidase (EC 3.2.1.23);Ontology_term
XLOC_001569	XLOC_001569	Scaffold_1:3249498-3250266	C	T	OK	542.661	488.624	-0.151328	-0.638509	Foldase protein PrsA precursor (EC 5.2.1.8);Ontology_term
XLOC_001570	XLOC_001570	Scaffold_1:3253305-3254352	C	T	OK	424.029	438.21	0.0474622	0.219464	FIG01238406: hypothetical protein
XLOC_001571	XLOC_001571	Scaffold_1:3255039-3257348	C	T	OK	1034.9	1195.73	0.208401	0.140644	hypothetical protein
XLOC_001572	XLOC_001572	Scaffold_1:3257643-3258108	C	T	OK	538.367	506.379	-0.0883737	-0.326087	unknown
XLOC_001573	XLOC_001573	Scaffold_1:3258145-3258592	C	T	OK	130.259	165.401	0.344584	1.08803	FIG01247115: hypothetical protein
XLOC_001574	XLOC_001574	Scaffold_1:3258660-3259071	C	T	OK	139.625	185.505	0.409899	1.27557	YbfF
XLOC_001575	XLOC_001575	Scaffold_1:3261431-3261938	C	T	OK	750.725	617.672	-0.281444	-1.18317	conserved hypothetical protein protein
XLOC_001576	XLOC_001576	Scaffold_1:3262017-3262365	C	T	OK	243.34	271.136	0.156041	0.504023	hypothetical protein
XLOC_001577	XLOC_001577	Scaffold_1:3263558-3264296	C	T	OK	477.318	442.233	-0.110143	-0.473444	FIG01231844: hypothetical protein
XLOC_001578	XLOC_001578	Scaffold_1:3264337-3265036	C	T	OK	298.88	285.719	-0.0649653	-0.249121	Transcriptional regulator%2C GntR family
XLOC_001579	XLOC_001579	Scaffold_1:3265983-3267423	C	T	OK	385.376	374.746	-0.0403529	-0.187208	Siderophore biosynthesis L-2%2C4-diaminobutyrate decarboxylase
XLOC_001580	XLOC_001580	Scaffold_1:3267456-3268215	C	T	OK	156.66	165.67	0.0806731	0.290998	Methyltransferase
XLOC_001581	XLOC_001581	Scaffold_1:3268694-3270572	C	T	OK	514.119	487.208	-0.0775636	-0.372281	Thymidylate kinase (EC 2.7.4.9);Ontology_term
XLOC_001582	XLOC_001582	Scaffold_1:3270630-3270897	C	T	OK	288.509	224.061	-0.364724	-1.04845	FIG01234963: hypothetical protein
XLOC_001583	XLOC_001583	Scaffold_1:3274093-3274987	C	T	OK	453.393	398.753	-0.185268	-0.826362	Chromosome initiation inhibitor
XLOC_001584	XLOC_001584	Scaffold_1:3281860-3283597	C	T	OK	462.087	436.032	-0.083728	-0.397503	Lipid A export ATP-binding/permease protein MsbA
XLOC_001585	XLOC_001585	Scaffold_1:3295663-3296006	C	T	OK	581.374	435.558	-0.416603	-0.751716	hypothetical protein
XLOC_001586	XLOC_001586	Scaffold_1:3296347-3296872	C	T	OK	547.824	472.689	-0.212822	-0.826844	hypothetical protein
XLOC_001587	XLOC_001587	Scaffold_1:3300864-3302712	C	T	OK	1147.33	1115.66	-0.0403862	-0.149854	Transcriptional regulator%2C GntR family
XLOC_001588	XLOC_001588	Scaffold_1:3312387-3312840	C	T	OK	259.75	273.735	0.0756582	0.271747	Purine nucleoside phosphorylase (EC 2.4.2.1);Ontology_term
XLOC_001589	XLOC_001589	Scaffold_1:3313014-3313932	C	T	OK	517.639	475.703	-0.121883	-0.559533	N-acetylmuramic acid 6-phosphate etherase
XLOC_001590	XLOC_001590	Scaffold_1:3313950-3314808	C	T	OK	445.923	461.132	0.0483858	0.212323	RpiR family transcriptional regulator YbbH%2C clustered with N-acetylmuramic acid utilization
XLOC_001591	XLOC_001591	Scaffold_1:3314824-3316192	C	T	OK	446.93	436.466	-0.0341826	-0.160998	PTS system%2C N-acetylmuramic acid-specific IIB component (EC 2.7.1.69) / PTS system%2C N-acetylmuramic acid-specific IIC component;Ontology_term
XLOC_001592	XLOC_001592	Scaffold_1:3316212-3317608	C	T	OK	630.56	543.879	-0.213347	-1.01094	beta-lactamase
XLOC_001593	XLOC_001593	Scaffold_1:3317622-3320783	C	T	OK	1039.38	1002.62	-0.0519593	-0.245671	Beta-hexosaminidase (EC 3.2.1.52);Ontology_term
XLOC_001594	XLOC_001594	Scaffold_1:3320901-3321771	C	T	OK	493.586	420.468	-0.231306	-1.00463	Phenazine biosynthesis protein PhzF like
XLOC_001595	XLOC_001595	Scaffold_1:3323736-3324906	C	T	OK	353.969	319.774	-0.146568	-0.657275	penicillin-binding protein%2C putative
XLOC_001596	XLOC_001596	Scaffold_1:3327545-3328130	C	T	OK	160.374	169.849	0.0828069	0.286328	Substrate-specific component ThiT of thiamin ECF transporter
XLOC_001597	XLOC_001597	Scaffold_1:3330009-3330198	C	T	OK	102.175	99.5146	-0.0380619	-0.0436634	FIG01234348: hypothetical protein
XLOC_001598	XLOC_001598	Scaffold_1:3330268-3331435	C	T	OK	138.11	154.041	0.157498	0.601877	response regulator aspartate phosphatase
XLOC_001599	XLOC_001599	Scaffold_1:3331436-3331565	C	T	OK	1648.14	1190.44	-0.469347	-0.442676	hypothetical protein
XLOC_001600	XLOC_001600	Scaffold_1:3331644-3332292	C	T	OK	1036.78	925.456	-0.163878	-0.755386	Pyrrolidone-carboxylate peptidase (EC 3.4.19.3);Ontology_term
XLOC_001601	XLOC_001601	Scaffold_1:3332415-3333072	C	T	OK	180.234	202.819	0.170324	0.605193	Trk system potassium uptake protein TrkA
XLOC_001602	XLOC_001602	Scaffold_1:3333074-3334394	C	T	OK	444.701	458.671	0.044626	0.206947	Potassium uptake protein TrkH
XLOC_001603	XLOC_001603	Scaffold_1:3335435-3335921	C	T	OK	680.399	652.073	-0.0613472	-0.244683	hypothetical protein
XLOC_001604	XLOC_001604	Scaffold_1:3339677-3340232	C	T	OK	183.326	180.374	-0.0234147	-0.0807788	FIG009707: Betaine operon transcriptional regulator
XLOC_001605	XLOC_001605	Scaffold_1:3340352-3341981	C	T	OK	496.633	476.53	-0.0596138	-0.283371	proline transporter
XLOC_001606	XLOC_001606	Scaffold_1:3344724-3345807	C	T	OK	549.654	543.733	-0.0156258	-0.0737238	OXALATE DECARBOXYLASE (EC 4.1.1.2);Ontology_term
XLOC_001607	XLOC_001607	Scaffold_1:3345967-3347095	C	T	NOTEST	0	0	0	0	hypothetical protein
XLOC_001608	XLOC_001608	Scaffold_1:3351485-3351891	C	T	OK	868.541	718.069	-0.274471	-1.05396	conserved hypothetical protein
XLOC_001609	XLOC_001609	Scaffold_1:3351911-3355191	C	T	OK	445.865	413.251	-0.109589	-0.164826	hypothetical protein
XLOC_001610	XLOC_001610	Scaffold_1:3358449-3359436	C	T	OK	626.781	555.619	-0.173865	-0.809172	Possible oxidoreductase
XLOC_001611	XLOC_001611	Scaffold_1:3366496-3368269	C	T	OK	586.351	497.36	-0.237475	-0.674383	Protein-glutamine gamma-glutamyltransferase (EC 2.3.2.13);Ontology_term
XLOC_001612	XLOC_001612	Scaffold_1:3370708-3371970	C	T	OK	506.084	438.8	-0.205812	-0.808934	Transcriptional regulator%2C TetR family
XLOC_001613	XLOC_001613	Scaffold_1:3375540-3377176	C	T	OK	1787.84	1606.06	-0.154694	-0.346089	FIG01236923: hypothetical protein
XLOC_001614	XLOC_001614	Scaffold_1:3377896-3378373	C	T	OK	532.414	561.186	0.0759324	0.299028	FIG01240913: hypothetical protein
XLOC_001615	XLOC_001615	Scaffold_1:3378447-3378975	C	T	OK	511.608	485.645	-0.075136	-0.308857	acetyltransferase
XLOC_001616	XLOC_001616	Scaffold_1:3381943-3382180	C	T	OK	64.4525	49.0212	-0.394831	-0.605435	DUF378 domain-containing protein
XLOC_001617	XLOC_001617	Scaffold_1:3384641-3385505	C	T	OK	502.279	515.549	0.0376227	0.171118	Hydrolase%2C alpha/beta fold family
XLOC_001618	XLOC_001618	Scaffold_1:3386482-3387646	C	T	OK	325.942	347.679	0.0931373	0.424612	Cystathionine beta-lyase%2C Bsu PatB (EC 4.4.1.8);Ontology_term
XLOC_001619	XLOC_001619	Scaffold_1:3387940-3388330	C	T	OK	379.952	341.771	-0.152787	-0.525831	KapB%2C lipoprotein required for KinB pathway to sporulation
XLOC_001620	XLOC_001620	Scaffold_1:3389246-3390464	C	T	OK	573.003	600.929	0.0686512	0.323841	FIG01228594: hypothetical protein
XLOC_001621	XLOC_001621	Scaffold_1:3390563-3392853	C	T	OK	1020.89	915.32	-0.157481	-0.527263	Multimodular transpeptidase-transglycosylase (EC 2.4.1.129) (EC 3.4.-.-);Ontology_term
XLOC_001622	XLOC_001622	Scaffold_1:3393648-3396182	C	T	OK	429.175	429.659	0.00162699	0.00755911	Two-component sensor histidine kinase%2C malate (EC 2.7.3.-);Ontology_term
XLOC_001623	XLOC_001623	Scaffold_1:3396348-3398256	C	T	OK	711.175	704.71	-0.0131739	-0.043624	CDP-diacylglycerol--serine O-phosphatidyltransferase (EC 2.7.8.8);Ontology_term
XLOC_001624	XLOC_001624	Scaffold_1:3398529-3399873	C	T	OK	630.829	598.13	-0.0767893	-0.363182	Malate Na(+) symporter
XLOC_001625	XLOC_001625	Scaffold_1:3400411-3405054	C	T	OK	1750.82	1695.25	-0.0465309	-0.117778	Na(+) H(+) antiporter subunit A
XLOC_001626	XLOC_001626	Scaffold_1:3405059-3406178	C	T	OK	1788.39	1711.39	-0.0634898	-0.230971	Na(+) H(+) antiporter subunit E
XLOC_001627	XLOC_001627	Scaffold_1:3411600-3411915	C	T	OK	866.453	826.928	-0.0673597	-0.241347	unknown
XLOC_001628	XLOC_001628	Scaffold_1:3415456-3415981	C	T	NOTEST	0	0	0	0	hypothetical protein
XLOC_001629	XLOC_001629	Scaffold_1:3416074-3416618	C	T	OK	32.5455	0	#NAME?	#NAME?	hypothetical protein
XLOC_001630	XLOC_001630	Scaffold_1:3417971-3418406	C	T	OK	157.717	182.952	0.214131	0.690256	Rrf2 family transcriptional regulator%2C group III
XLOC_001631	XLOC_001631	Scaffold_1:3418565-3419462	C	T	OK	435.355	421.74	-0.0458362	-0.209083	probable lipase/esterase
XLOC_001632	XLOC_001632	Scaffold_1:3419608-3421599	C	T	OK	356.481	317.699	-0.166164	-0.716208	FIG01235621: hypothetical protein
XLOC_001633	XLOC_001633	Scaffold_1:3434991-3436230	C	T	OK	410.126	405.764	-0.015426	-0.0708995	Regulator of polyketide synthase expression
XLOC_001634	XLOC_001634	Scaffold_1:3436340-3437480	C	T	OK	460.675	446.484	-0.0451397	-0.211728	Alanine dehydrogenase (EC 1.4.1.1);Ontology_term
XLOC_001635	XLOC_001635	Scaffold_1:3438486-3439083	C	T	OK	345.828	345.828	-2.81e-06	-1.08e-05	Substrate-specific component BioY of biotin ECF transporter
XLOC_001636	XLOC_001636	Scaffold_1:3442298-3442775	C	T	OK	216.75	187.53	-0.208911	-0.704452	YuiD
XLOC_001637	XLOC_001637	Scaffold_1:3445905-3446904	C	T	OK	187.647	233.089	0.312866	1.25203	Thioredoxin reductase (EC 1.8.1.9);Ontology_term
XLOC_001638	XLOC_001638	Scaffold_1:3451497-3452565	C	T	OK	322.915	336.226	0.0582745	0.261868	NADH dehydrogenase (EC 1.6.99.3);Ontology_term
XLOC_001639	XLOC_001639	Scaffold_1:3455494-3455995	C	T	OK	315.105	308.979	-0.0283234	-0.104435	Phenolic acid decarboxylase (EC 4.1.1.-);Ontology_term
XLOC_001640	XLOC_001640	Scaffold_1:3456914-3457154	C	T	OK	258.225	219.493	-0.234452	-0.609486	NifU-like domain protein
XLOC_001641	XLOC_001641	Scaffold_1:3464981-3465482	C	T	OK	323.213	274.184	-0.237339	-0.843092	Low temperature requirement C protein
XLOC_001642	XLOC_001642	Scaffold_1:3467167-3467785	C	T	OK	275.154	237.959	-0.209527	-0.770659	Phosphonate ABC transporter phosphate-binding periplasmic component (TC 3.A.1.9.1)
XLOC_001643	XLOC_001643	Scaffold_1:3468987-3469968	C	T	OK	573.687	523.908	-0.130949	-0.609494	Cell wall endopeptidase%2C family M23/M37
XLOC_001644	XLOC_001644	Scaffold_1:3476885-3477470	C	T	OK	400.416	372.104	-0.105793	-0.412848	HTH-type transcriptional regulator pksA
XLOC_001645	XLOC_001645	Scaffold_1:3479228-3480827	C	T	OK	459.061	434.389	-0.0797002	-0.377269	Purine catabolism regulatory protein
XLOC_001646	XLOC_001646	Scaffold_1:3483953-3485000	C	T	OK	455.094	428.978	-0.085261	-0.392915	Anthranilate phosphoribosyltransferase (EC 2.4.2.18);Ontology_term
XLOC_001647	XLOC_001647	Scaffold_1:3485079-3485901	C	T	OK	696.439	594.404	-0.228551	-1.06092	Extracellular ribonuclease Bsn
XLOC_001648	XLOC_001648	Scaffold_1:3489701-3489821	C	T	OK	541.743	1132.26	1.06352	0.529569	hypothetical protein
XLOC_001649	XLOC_001649	Scaffold_1:3510017-3510179	C	T	OK	1825.78	1203.93	-0.600762	-1.28972	FIG01226860: hypothetical protein
XLOC_001650	XLOC_001650	Scaffold_1:3510255-3510507	C	T	OK	365.728	314.689	-0.216845	-0.622871	FIG01230825: hypothetical protein
XLOC_001651	XLOC_001651	Scaffold_1:3510517-3510859	C	T	OK	854.186	732.889	-0.220955	-0.799794	Spore coat F-containing protein
XLOC_001652	XLOC_001652	Scaffold_1:3514926-3515904	C	T	OK	482.452	506.343	0.0697272	0.320416	ABC-type Fe3+-siderophore transport system%2C periplasmic iron-binding component
XLOC_001653	XLOC_001653	Scaffold_1:3519662-3520505	C	T	OK	270.583	260.503	-0.0547719	-0.21866	Sorbitol-6-phosphate 2-dehydrogenase (EC 1.1.1.140);Ontology_term
XLOC_001654	XLOC_001654	Scaffold_1:3520598-3521063	C	T	OK	152.513	154.38	0.0175578	0.0562076	Non-specific DNA-binding protein Dps / Iron-binding ferritin-like antioxidant protein / Ferroxidase (EC 1.16.3.1);Ontology_term
XLOC_001655	XLOC_001655	Scaffold_1:3522970-3524988	C	T	OK	437.994	417.75	-0.0682736	-0.278378	Transcriptional regulatory protein cssR
XLOC_001656	XLOC_001656	Scaffold_1:3525363-3526248	C	T	OK	310.662	313.773	0.0143734	0.058799	TetR family transcriptional regulator probably coupled to RND multidrug efflux transporter
XLOC_001657	XLOC_001657	Scaffold_1:3528056-3531686	C	T	OK	1384.2	1339.3	-0.0475735	-0.227933	Spore germination protein GerAA%2C germination response to L-alanine and related amino acids (earliest stage)
XLOC_001658	XLOC_001658	Scaffold_1:3531747-3532113	C	T	OK	429.171	396.751	-0.113321	-0.385343	FIG01234661: hypothetical protein
XLOC_001659	XLOC_001659	Scaffold_1:3538693-3539440	C	T	OK	552.498	580.841	0.0721754	0.322681	3-oxoacyl-[acyl-carrier protein] reductase (EC 1.1.1.100);Ontology_term
XLOC_001660	XLOC_001660	Scaffold_1:3548568-3549249	C	T	OK	397.66	428.599	0.108093	0.455854	Transcriptional regulator%2C GntR family
XLOC_001661	XLOC_001661	Scaffold_1:3549347-3550139	C	T	OK	261.271	269.142	0.0428212	0.171546	3-oxoacyl-[acyl-carrier protein] reductase (EC 1.1.1.100);Ontology_term
XLOC_001662	XLOC_001662	Scaffold_1:3551068-3551977	C	T	OK	452.048	443.651	-0.0270499	-0.121625	Chromosome initiation inhibitor
XLOC_001663	XLOC_001663	Scaffold_1:3568401-3568872	C	T	OK	1158.57	1085.41	-0.0941073	-0.419163	FIG01225812: hypothetical protein
XLOC_001664	XLOC_001664	Scaffold_1:3568971-3570831	C	T	OK	264.938	291.983	0.140228	0.648568	Lipoteichoic acid synthase LtaS Type IIIa
XLOC_001665	XLOC_001665	Scaffold_1:3571030-3572482	C	T	OK	626.458	597.452	-0.068396	-0.327706	Multidrug and toxin extrusion (MATE) family efflux pump YdhE/NorM%2C homolog
XLOC_001666	XLOC_001666	Scaffold_1:3574391-3574511	C	T	OK	1114.54	570.306	-0.966635	-0.448813	hypothetical protein
XLOC_001667	XLOC_001667	Scaffold_1:3574519-3575698	C	T	OK	282.342	341.898	0.276122	1.24502	Cysteine desulfurase (EC 2.8.1.7);Ontology_term
XLOC_001668	XLOC_001668	Scaffold_1:3575774-3576185	C	T	OK	95.8519	82.6396	-0.213973	-0.638057	hypothetical protein
XLOC_001669	XLOC_001669	Scaffold_1:3580880-3581411	C	T	OK	572.398	553.292	-0.0489765	-0.202929	Uncharacterised protein family UPF0157 (COG2320)
XLOC_001670	XLOC_001670	Scaffold_1:3585679-3586900	C	T	OK	565.251	543.37	-0.0569581	-0.266654	Possible alpha-xyloside ABC transporter%2C substrate-binding component
XLOC_001671	XLOC_001671	Scaffold_1:3586926-3588638	C	T	OK	916.41	847.449	-0.112867	-0.528586	Possible alpha-xyloside ABC transporter%2C permease component
XLOC_001672	XLOC_001672	Scaffold_1:3588659-3590969	C	T	OK	607.155	556.24	-0.126359	-0.613923	Alpha-xylosidase (EC 3.2.1.-);Ontology_term
XLOC_001673	XLOC_001673	Scaffold_1:3590983-3593926	C	T	OK	431.431	434.503	0.0102362	0.0496588	Beta-glucosidase (EC 3.2.1.21);Ontology_term
XLOC_001674	XLOC_001674	Scaffold_1:3594150-3595751	C	T	OK	807.844	807.177	-0.00119126	-0.00546283	Manganese ABC transporter%2C ATP-binding protein SitB
XLOC_001675	XLOC_001675	Scaffold_1:3595779-3596709	C	T	OK	452.934	459.028	0.0192812	0.0856676	Manganese ABC transporter%2C periplasmic-binding protein SitA
XLOC_001676	XLOC_001676	Scaffold_1:3596813-3597140	C	T	OK	650.942	725.312	0.156073	0.574552	Ferredoxin
XLOC_001677	XLOC_001677	Scaffold_1:3597249-3598029	C	T	OK	269.189	287.212	0.0934954	0.368094	Phosphosugar-binding transcriptional repressor%2C RpiR family
XLOC_001678	XLOC_001678	Scaffold_1:3598112-3599027	C	T	OK	358.334	374.239	0.0626561	0.272783	Tagatose-6-phosphate kinase (EC 2.7.1.144) / 1-phosphofructokinase (EC 2.7.1.56);Ontology_term
XLOC_001679	XLOC_001679	Scaffold_1:3599040-3600441	C	T	OK	455.598	464.198	0.0269792	0.127355	PTS system%2C mannose-specific IIB component (EC 2.7.1.69) / PTS system%2C mannose-specific IIC component / PTS system%2C mannose-specific IIA component;Ontology_term
XLOC_001680	XLOC_001680	Scaffold_1:3600447-3600906	C	T	OK	745.104	638.332	-0.223135	-0.88199	PTS system%2C galactose-inducible IIA component (EC 2.7.1.69);Ontology_term
XLOC_001681	XLOC_001681	Scaffold_1:3600931-3601783	C	T	OK	224.229	226.913	0.017168	0.0673837	Tagatose 1%2C6-bisphosphate aldolase (EC 4.1.2.40);Ontology_term
XLOC_001682	XLOC_001682	Scaffold_1:3612216-3613416	C	T	OK	311.256	278.165	-0.162162	-0.718339	FIG01233519: hypothetical protein
XLOC_001683	XLOC_001683	Scaffold_1:3614742-3614859	C	T	NOTEST	0	0	0	0	hypothetical protein
XLOC_001684	XLOC_001684	Scaffold_1:3615187-3618105	C	T	OK	1123.42	1073.49	-0.0655864	-0.265319	YVMC
XLOC_001685	XLOC_001685	Scaffold_1:3619578-3620628	C	T	OK	575.027	525.491	-0.129963	-0.607707	Nucleoside-diphosphate-sugar epimerases
XLOC_001686	XLOC_001686	Scaffold_1:3622747-3623674	C	T	OK	0	108.862	inf	#NAME?	hypothetical protein
XLOC_001687	XLOC_001687	Scaffold_1:3623831-3623981	C	T	NOTEST	0	0	0	0	FIG01238344: hypothetical protein
XLOC_001688	XLOC_001688	Scaffold_1:3624074-3625229	C	T	OK	388.588	385.954	-0.00981145	-0.0452173	Oxalate decarboxylase (EC 4.1.1.2);Ontology_term
XLOC_001689	XLOC_001689	Scaffold_1:3625301-3625700	C	T	OK	196.654	200.151	0.025428	0.0815455	FIG01227252: hypothetical protein
XLOC_001690	XLOC_001690	Scaffold_1:3625791-3626250	C	T	OK	141.416	141.685	0.00273933	0.00892862	FIG01232042: hypothetical protein
XLOC_001691	XLOC_001691	Scaffold_1:3626397-3627843	C	T	OK	286.75	309.35	0.109447	0.498212	FIG01240146: hypothetical protein
XLOC_001692	XLOC_001692	Scaffold_1:3629343-3631018	C	T	NOTEST	0	0	0	0	hypothetical protein
XLOC_001693	XLOC_001693	Scaffold_1:3631925-3632468	C	T	OK	316.935	295.587	-0.100603	-0.362501	unknown
XLOC_001694	XLOC_001694	Scaffold_1:3633061-3633211	C	T	OK	50.3135	0	#NAME?	#NAME?	hypothetical protein
XLOC_001695	XLOC_001695	Scaffold_1:3633304-3635023	C	T	OK	425.998	416.583	-0.0322416	-0.152269	Putative toxin component near putative ESAT-related proteins%2C repetitive / Repetitive hypothetical protein near ESAT cluster%2C SA0282 homolog
XLOC_001696	XLOC_001696	Scaffold_1:3635028-3635313	C	T	OK	33.0413	49.3867	0.579852	1.06713	Orbi_VP5%2C Orbivirus outer capsid protein VP5
XLOC_001697	XLOC_001697	Scaffold_1:3639891-3640241	C	T	NOTEST	0	0	0	0	hypothetical protein
XLOC_001698	XLOC_001698	Scaffold_1:3641095-3641503	C	T	OK	169.721	181.361	0.0957024	0.311336	YVAO protein
XLOC_001699	XLOC_001699	Scaffold_1:3641675-3642074	C	T	OK	176.701	190.888	0.111419	0.360644	immunity repressor protein (phage-related protein)
XLOC_001700	XLOC_001700	Scaffold_1:3645819-3646359	C	T	OK	227.459	201.884	-0.172085	-0.601683	portion of orf between proU operon and 181 operon
XLOC_001701	XLOC_001701	Scaffold_1:3647203-3647983	C	T	OK	564.744	596.893	0.0798754	0.361623	unknown
XLOC_001702	XLOC_001702	Scaffold_1:3651031-3651484	C	T	OK	354.464	361.135	0.0269	0.0963421	Methyl-accepting chemotaxis protein
XLOC_001703	XLOC_001703	Scaffold_1:3652102-3652519	C	T	OK	665.262	600.876	-0.146857	-0.556059	FIG01231556: hypothetical protein
XLOC_001704	XLOC_001704	Scaffold_1:3652833-3652953	C	T	NOTEST	0	0	0	0	hypothetical protein
XLOC_001705	XLOC_001705	Scaffold_1:3664416-3664536	C	T	NOTEST	0	0	0	0	hypothetical protein
XLOC_001706	XLOC_001706	Scaffold_1:3664572-3665046	C	T	OK	315.882	307.968	-0.0366059	-0.12796	FIG01232402: hypothetical protein
XLOC_001707	XLOC_001707	Scaffold_1:3671239-3672931	C	T	OK	402.719	401.219	-0.00538557	-0.0255006	L-lactate permease
XLOC_001708	XLOC_001708	Scaffold_1:3674348-3674564	C	T	OK	17.4287	37.9239	1.12165	0.932051	unknown
XLOC_001709	XLOC_001709	Scaffold_1:3690730-3691189	C	T	OK	476.859	468.497	-0.0255229	-0.094385	Slr%2C positive regulator of the extracellular matrix biosynthesis operon yqxM-sipW-tasA
XLOC_001710	XLOC_001710	Scaffold_1:3691411-3692126	C	T	OK	282.525	258.866	-0.126172	-0.445791	NAD(P)H oxidoreductase YRKL (EC 1.6.99.-) @ Putative NADPH-quinone reductase (modulator of drug activity B) @ Flavodoxin 2;Ontology_term
XLOC_001711	XLOC_001711	Scaffold_1:3701511-3702606	C	T	OK	310.155	341.415	0.13854	0.630584	NADH-dependent flavin oxidoreductase
XLOC_001712	XLOC_001712	Scaffold_1:3702954-3704400	C	T	OK	400.536	365.784	-0.130937	-0.605659	Levansucrase (EC 2.4.1.10);Ontology_term
XLOC_001713	XLOC_001713	Scaffold_1:3704479-3706027	C	T	OK	329.972	348.801	0.0800616	0.372494	Levanase (EC 3.2.1.65);Ontology_term
XLOC_001714	XLOC_001714	Scaffold_1:3706994-3707591	C	T	OK	415.144	394.007	-0.0753905	-0.296863	ATP-dependent Clp protease proteolytic subunit (EC 3.4.21.92);Ontology_term
XLOC_001715	XLOC_001715	Scaffold_1:3708351-3709651	C	T	OK	681.732	687.508	0.0121714	0.0394433	MazG related NTP pyrophosphohydrolase
XLOC_001716	XLOC_001716	Scaffold_1:3712315-3713287	C	T	OK	146.069	185.468	0.344521	1.32932	Glyoxylate reductase (EC 1.1.1.79) / Glyoxylate reductase (EC 1.1.1.26) / Hydroxypyruvate reductase (EC 1.1.1.81);Ontology_term
XLOC_001717	XLOC_001717	Scaffold_1:3713990-3714686	C	T	OK	101.594	138.618	0.44829	1.58743	Transcriptional regulator%2C ArsR family
XLOC_001718	XLOC_001718	Scaffold_1:3714940-3715396	C	T	OK	144.918	181.693	0.326271	1.07921	Ribonuclease (EC 3.1.27.-) (RNase Bci);Ontology_term
XLOC_001719	XLOC_001719	Scaffold_1:3715400-3715676	C	T	OK	33.1425	44.7106	0.431935	0.756979	Barstar
XLOC_001720	XLOC_001720	Scaffold_1:3720134-3720275	C	T	NOTEST	0	0	0	0	hypothetical protein
XLOC_001721	XLOC_001721	Scaffold_1:3723432-3723930	C	T	OK	286.662	306.63	0.0971458	0.345714	YbbJ
XLOC_001722	XLOC_001722	Scaffold_1:3730613-3731339	C	T	OK	144.957	160.425	0.146275	0.520689	FIG00774329: hypothetical protein
XLOC_001723	XLOC_001723	Scaffold_1:3731618-3732287	C	T	OK	324.732	315.312	-0.0424679	-0.169849	Secreted pectate lyase HrpW
XLOC_001724	XLOC_001724	Scaffold_1:3736393-3736873	C	T	OK	431.034	420.89	-0.0343568	-0.129924	putative transcriptional regulator YfiV
XLOC_001725	XLOC_001725	Scaffold_1:3737012-3738572	C	T	OK	720.971	659.553	-0.128452	-0.618195	drug resistance transporter%2C EmrB/QacA family
XLOC_001726	XLOC_001726	Scaffold_1:3744918-3745538	C	T	OK	285.938	236.443	-0.274209	-0.280455	YvkN
XLOC_001727	XLOC_001727	Scaffold_1:3781384-3782023	C	T	OK	413.861	347.847	-0.250696	-1.00675	FIG000605: protein co-occurring with transport systems (COG1739)
XLOC_001728	XLOC_001728	Scaffold_1:3782037-3783117	C	T	OK	466.158	479.086	0.0394644	0.18143	Cell envelope-associated transcriptional attenuator LytR-CpsA-Psr%2C subfamily F2 (as in PMID19099556)
XLOC_001729	XLOC_001729	Scaffold_1:3797702-3798695	C	T	OK	414.933	369.344	-0.167911	-0.739543	Cell envelope-associated transcriptional attenuator LytR-CpsA-Psr%2C subfamily F2 (as in PMID19099556)
XLOC_001730	XLOC_001730	Scaffold_1:3799192-3800071	C	T	OK	317.263	320.438	0.0143692	0.0615356	UTP--glucose-1-phosphate uridylyltransferase (EC 2.7.7.9);Ontology_term
XLOC_001731	XLOC_001731	Scaffold_1:3802475-3802865	C	T	OK	226.145	283.997	0.328624	1.09353	Glycerol-3-phosphate cytidylyltransferase (EC 2.7.7.39);Ontology_term
XLOC_001732	XLOC_001732	Scaffold_1:3802998-3805041	C	T	OK	170.256	164.965	-0.045541	-0.193969	Poly(glycerol-phosphate) alpha-glucosyltransferase (EC 2.4.1.52);Ontology_term
XLOC_001733	XLOC_001733	Scaffold_1:3805152-3807273	C	T	OK	249.906	250.269	0.00209261	0.00960973	CDP-glycerol:poly(glycerophosphate) glycerophosphotransferase (EC 2.7.8.12);Ontology_term
XLOC_001734	XLOC_001734	Scaffold_1:3807738-3811365	C	T	OK	459.514	425.286	-0.111675	-0.539942	Teichoic acid biosynthesis protein
XLOC_001735	XLOC_001735	Scaffold_1:3811622-3812438	C	T	OK	322.445	323.111	0.00297561	0.0118195	Teichoic acid translocation permease protein TagG
XLOC_001736	XLOC_001736	Scaffold_1:3812458-3814057	C	T	OK	187.068	192.046	0.0378863	0.16067	Teichoic acid export ATP-binding protein TagH (EC 3.6.3.40);Ontology_term
XLOC_001737	XLOC_001737	Scaffold_1:3817049-3817874	C	T	OK	441.1	382.746	-0.204719	-0.88606	Glycosyl transferase%2C group 2 family protein (EC 2.4.-.-);Ontology_term
XLOC_001738	XLOC_001738	Scaffold_1:3837138-3837966	C	T	OK	209.738	237.171	0.177336	0.681413	4-deoxy-L-threo-5-hexosulose-uronate ketol-isomerase (EC 5.3.1.17);Ontology_term
XLOC_001739	XLOC_001739	Scaffold_1:3837981-3838746	C	T	OK	259.248	298.112	0.201526	0.820476	2-deoxy-D-gluconate 3-dehydrogenase (EC 1.1.1.125);Ontology_term
XLOC_001740	XLOC_001740	Scaffold_1:3840064-3840202	C	T	OK	293.807	0	#NAME?	#NAME?	hypothetical protein
XLOC_001741	XLOC_001741	Scaffold_1:3841930-3842887	C	T	OK	278.006	285.653	0.03915	0.161992	Cell envelope-associated transcriptional attenuator LytR-CpsA-Psr%2C subfamily F2 (as in PMID19099556)
XLOC_001742	XLOC_001742	Scaffold_1:3843075-3843936	C	T	OK	390.142	430.261	0.141214	0.620295	hydrolase%2C haloacid dehalogenase-like family
XLOC_001743	XLOC_001743	Scaffold_1:3849482-3850463	C	T	OK	312.626	361.391	0.209124	0.91895	Ribose operon repressor
XLOC_001744	XLOC_001744	Scaffold_1:3850465-3851739	C	T	OK	620.512	700.992	0.175939	0.607719	Ribokinase (EC 2.7.1.15);Ontology_term
XLOC_001745	XLOC_001745	Scaffold_1:3851776-3853258	C	T	OK	266.34	309.745	0.217809	0.995196	Ribose ABC transport system%2C ATP-binding protein RbsA (TC 3.A.1.2.1)
XLOC_001746	XLOC_001746	Scaffold_1:3853259-3854222	C	T	OK	205.327	223.254	0.120759	0.489042	Ribose ABC transport system%2C permease protein RbsC (TC 3.A.1.2.1)
XLOC_001747	XLOC_001747	Scaffold_1:3854236-3855151	C	T	OK	302.495	361.944	0.258856	1.13766	Ribose ABC transport system%2C periplasmic ribose-binding protein RbsB (TC 3.A.1.2.1)
XLOC_001748	XLOC_001748	Scaffold_1:3856211-3856979	C	T	OK	257.174	306.253	0.25198	1.00699	SAM-dependent methyltransferase YafE (UbiE paralog)
XLOC_001749	XLOC_001749	Scaffold_1:3859760-3860639	C	T	OK	149.672	194.445	0.377552	1.48011	LysR family regulatory protein CidR
XLOC_001750	XLOC_001750	Scaffold_1:3862538-3863015	C	T	OK	129.807	171.41	0.40108	1.3036	Transcriptional regulator%2C AsnC family
XLOC_001751	XLOC_001751	Scaffold_1:3863036-3864154	C	T	OK	630.17	800.193	0.344606	1.49734	Chromate transport protein
XLOC_001752	XLOC_001752	Scaffold_1:3866338-3870689	C	T	OK	663.912	703.549	0.0836587	0.375633	FIG01230320: hypothetical protein
XLOC_001753	XLOC_001753	Scaffold_1:3882422-3882836	C	T	OK	153.608	200.55	0.384708	1.25952	unknown
XLOC_001754	XLOC_001754	Scaffold_1:3883841-3884759	C	T	NOTEST	0	0	0	0	hypothetical protein
XLOC_001755	XLOC_001755	Scaffold_1:3887659-3889285	C	T	OK	490.87	475.469	-0.0459915	-0.20702	Transcriptional regulator%2C MarR family
XLOC_001756	XLOC_001756	Scaffold_1:3889434-3890013	C	T	OK	654.414	624.74	-0.0669481	-0.285459	YwoA
XLOC_001757	XLOC_001757	Scaffold_1:3892070-3892799	C	T	OK	341.199	395.596	0.213414	0.882751	YqjF
XLOC_001758	XLOC_001758	Scaffold_1:3892971-3893433	C	T	OK	239.689	206.672	-0.213827	-0.733171	transcriptional regulator
XLOC_001759	XLOC_001759	Scaffold_1:3893511-3894459	C	T	OK	594.447	511.444	-0.216973	-0.992569	Nucleoside-diphosphate-sugar epimerases
XLOC_001760	XLOC_001760	Scaffold_1:3896125-3897424	C	T	OK	199.88	217.419	0.121346	0.519646	Magnesium and cobalt efflux protein CorC
XLOC_001761	XLOC_001761	Scaffold_1:3897572-3898784	C	T	OK	384.155	405.753	0.0789142	0.368465	Ammonium transporter
XLOC_001762	XLOC_001762	Scaffold_1:3898802-3899153	C	T	OK	644.971	693.603	0.104874	0.378657	Nitrogen regulatory protein P-II
XLOC_001763	XLOC_001763	Scaffold_1:3902590-3903145	C	T	OK	520.06	504.495	-0.0438394	-0.180872	Phosphinothricin N-acetyltransferase (EC 2.3.1.-);Ontology_term
XLOC_001764	XLOC_001764	Scaffold_1:3903868-3905335	C	T	OK	370.985	418.898	0.175239	0.817903	Cardiolipin synthetase (EC 2.7.8.-);Ontology_term
XLOC_001765	XLOC_001765	Scaffold_1:3918916-3919879	C	T	NOTEST	0	0	0	0	hypothetical protein
XLOC_001766	XLOC_001766	Scaffold_1:3924923-3925316	C	T	OK	104.334	124.488	0.25479	0.782589	FIG01232786: hypothetical protein
XLOC_001767	XLOC_001767	Scaffold_1:3926653-3927037	C	T	OK	208.657	222.866	0.0950489	0.308974	hypothetical protein
XLOC_001768	XLOC_001768	Scaffold_1:3929805-3931068	C	T	OK	276.579	318.388	0.203093	0.917262	Oxalate/formate antiporter
XLOC_001769	XLOC_001769	Scaffold_1:3931101-3933453	C	T	OK	313.925	338.93	0.11057	0.527887	Formate dehydrogenase-O%2C major subunit (EC 1.2.1.2);Ontology_term
XLOC_001770	XLOC_001770	Scaffold_1:3958935-3959925	C	T	OK	328.325	296.27	-0.148211	-0.62923	NTD biosynthesis operon regulator NtdR
XLOC_001771	XLOC_001771	Scaffold_1:3962766-3963150	C	T	OK	501.28	447.658	-0.163219	-0.580854	FIG01280259: hypothetical protein
XLOC_001772	XLOC_001772	Scaffold_1:3963285-3963846	C	T	OK	602.989	616.035	0.0308817	0.127643	unknown
XLOC_001773	XLOC_001773	Scaffold_1:3974852-3975383	C	T	OK	494.28	453.71	-0.123555	-0.489451	FIG01225390: hypothetical protein
XLOC_001774	XLOC_001774	Scaffold_1:3984918-3986109	C	T	OK	345.649	348.777	0.0129988	0.059929	Cardiolipin synthetase (EC 2.7.8.-);Ontology_term
XLOC_001775	XLOC_001775	Scaffold_1:3986179-3986449	C	T	OK	150.423	97.2074	-0.629887	-1.39521	FIG01243758: hypothetical protein
XLOC_001776	XLOC_001776	Scaffold_1:3990911-3992984	C	T	OK	477.622	452.745	-0.0771707	-0.370808	Multimodular transpeptidase-transglycosylase (EC 2.4.1.129) (EC 3.4.-.-);Ontology_term
XLOC_001777	XLOC_001777	Scaffold_1:3994343-3994529	C	T	OK	260.803	197.873	-0.398382	-0.669662	4-oxalocrotonate tautomerase (EC 5.3.2.-);Ontology_term
XLOC_001778	XLOC_001778	Scaffold_1:3998058-3998844	C	T	OK	406.241	405.683	-0.00198361	-0.00827464	Prespore specific transcriptional activator RsfA
XLOC_001779	XLOC_001779	Scaffold_1:3999010-3999340	C	T	OK	339.527	321.745	-0.0776068	-0.25618	FIG01239969: hypothetical protein
XLOC_001780	XLOC_001780	Scaffold_1:4006496-4006646	C	T	OK	0	200.064	inf	#NAME?	hypothetical protein
XLOC_001781	XLOC_001781	Scaffold_1:4006653-4007433	C	T	OK	397.588	367.733	-0.112614	-0.485707	Transcriptional regulator%2C IclR family
XLOC_001782	XLOC_001782	Scaffold_1:4007451-4008402	C	T	OK	367.858	371.885	0.0157054	0.0689267	2-amino-3-carboxymuconate-6-semialdehyde decarboxylase (EC 4.1.1.45);Ontology_term
XLOC_001783	XLOC_001783	Scaffold_1:4009705-4010470	C	T	OK	665.589	664.144	-0.0031354	-0.0142128	Hemoprotein HemQ%2C essential component of heme biosynthetic pathway in Gram-positive bacteria
XLOC_001784	XLOC_001784	Scaffold_1:4011454-4012949	C	T	OK	308.661	290.134	-0.0893056	-0.407653	Potassium uptake protein TrkH
XLOC_001785	XLOC_001785	Scaffold_1:4013052-4013589	C	T	OK	712.879	749.329	0.071942	0.323092	alternate gene name: ipa-62r
XLOC_001786	XLOC_001786	Scaffold_1:4021183-4022614	C	T	OK	361.212	366.65	0.0215592	0.0999636	Aldehyde dehydrogenase (EC 1.2.1.3);Ontology_term
XLOC_001787	XLOC_001787	Scaffold_1:4024411-4025224	C	T	OK	347.659	316.744	-0.134356	-0.557921	Hydroxymethylpyrimidine phosphate kinase ThiD (EC 2.7.4.7);Ontology_term
XLOC_001788	XLOC_001788	Scaffold_1:4030338-4032759	C	T	OK	409.017	400.51	-0.0303222	-0.145906	extracellular serine protease
XLOC_001789	XLOC_001789	Scaffold_1:4032882-4034135	C	T	OK	731.223	649.994	-0.169886	-0.150675	FIG01248990: hypothetical protein
XLOC_001790	XLOC_001790	Scaffold_1:4034222-4034360	C	T	OK	120.484	0	#NAME?	#NAME?	hypothetical protein
XLOC_001791	XLOC_001791	Scaffold_1:4034388-4036458	C	T	OK	408.291	426.457	0.0628018	0.181811	hypothetical protein
XLOC_001792	XLOC_001792	Scaffold_1:4039227-4040583	C	T	OK	392.897	366.129	-0.101798	-0.471209	Predicted arginine uptake transporter
XLOC_001793	XLOC_001793	Scaffold_1:4040989-4041250	C	T	OK	1330.49	1344.58	0.015199	0.0519	FIG01230831: hypothetical protein
XLOC_001794	XLOC_001794	Scaffold_1:4049747-4050480	C	T	NOTEST	0	0	0	0	hypothetical protein
XLOC_001795	XLOC_001795	Scaffold_1:4050651-4050768	C	T	NOTEST	0	0	0	0	hypothetical protein
XLOC_001796	XLOC_001796	Scaffold_1:4057051-4057201	C	T	OK	54.6617	0	#NAME?	#NAME?	hypothetical protein
XLOC_001797	XLOC_001797	Scaffold_1:4057738-4058302	C	T	OK	262.368	315.306	0.26516	0.988056	FMN reductase%2C NADPH-dependent
XLOC_001798	XLOC_001798	Scaffold_1:4058483-4060333	C	T	OK	418.582	537.807	0.361577	0.861113	FIG013268: hypothetical protein
XLOC_001799	XLOC_001799	Scaffold_1:4063427-4064591	C	T	OK	273.351	300.341	0.135844	0.601566	Xylose-responsive transcription regulator%2C ROK family
XLOC_001800	XLOC_001800	Scaffold_1:4068316-4069371	C	T	OK	563.693	596.516	0.0816521	0.282962	Holin-like protein CidA
XLOC_001801	XLOC_001801	Scaffold_1:4072624-4073005	C	T	OK	305.856	311.055	0.0243159	0.0834161	Lactoylglutathione lyase and related lyases
XLOC_001802	XLOC_001802	Scaffold_1:4075760-4077558	C	T	OK	974.571	1007.54	0.047999	0.213687	sensor histidine kinase%2C putative
XLOC_001803	XLOC_001803	Scaffold_1:4077747-4079847	C	T	OK	372.715	353.472	-0.0764765	-0.360332	Putative antibiotic transport-associated protein
XLOC_001804	XLOC_001804	Scaffold_1:4086016-4087366	C	T	OK	199.436	212.371	0.090662	0.396784	Aminopeptidase Y (Arg%2C Lys%2C Leu preference) (EC 3.4.11.15);Ontology_term
XLOC_001805	XLOC_001805	Scaffold_1:4087420-4090069	C	T	OK	542.317	737.573	0.44365	0.625551	hypothetical protein
XLOC_001806	XLOC_001806	Scaffold_1:4090588-4090738	C	T	NOTEST	0	0	0	0	hypothetical protein
XLOC_001807	XLOC_001807	Scaffold_1:4090752-4093415	C	T	OK	589.837	585.046	-0.0117663	-0.0534893	D-alanine--poly(phosphoribitol) ligase subunit 1 (EC 6.1.1.13);Ontology_term
XLOC_001808	XLOC_001808	Scaffold_1:4093430-4094836	C	T	OK	374.582	401.586	0.10043	0.161825	D-alanine--poly(phosphoribitol) ligase subunit 2 (EC 6.1.1.13);Ontology_term
XLOC_001809	XLOC_001809	Scaffold_1:4095007-4096099	C	T	OK	421.773	427.281	0.0187187	0.085486	Branched-chain amino acid aminotransferase (EC 2.6.1.42);Ontology_term
XLOC_001810	XLOC_001810	Scaffold_1:4096332-4097595	C	T	OK	568.022	534.58	-0.0875404	-0.41029	FIG01233826: hypothetical protein
XLOC_001811	XLOC_001811	Scaffold_1:4104259-4104931	C	T	OK	279.514	276.854	-0.0137987	-0.0511081	Propionate catabolism operon transcriptional regulator of GntR family [predicted]
XLOC_001812	XLOC_001812	Scaffold_1:4105006-4106122	C	T	OK	478.482	487.712	0.0275637	0.126567	2-methylcitrate synthase (EC 2.3.3.5);Ontology_term
XLOC_001813	XLOC_001813	Scaffold_1:4106158-4107598	C	T	OK	454.745	446.396	-0.0267342	-0.12597	2-methylcitrate dehydratase (EC 4.2.1.79);Ontology_term
XLOC_001814	XLOC_001814	Scaffold_1:4107610-4108528	C	T	OK	568.556	563.974	-0.0116744	-0.0538452	Methylisocitrate lyase (EC 4.1.3.30);Ontology_term
XLOC_001815	XLOC_001815	Scaffold_1:4113041-4113832	C	T	OK	177.382	193.616	0.126337	0.431827	FIG01237759: hypothetical protein
XLOC_001816	XLOC_001816	Scaffold_1:4113852-4114326	C	T	OK	583.617	495.084	-0.237347	-0.910971	FIG01237759: hypothetical protein
XLOC_001817	XLOC_001817	Scaffold_1:4118800-4120012	C	T	OK	404.059	361.014	-0.162511	-0.742136	putative transport protein
XLOC_001818	XLOC_001818	Scaffold_1:4122618-4124010	C	T	OK	271.996	304.598	0.163323	0.75234	Catalase (EC 1.11.1.6);Ontology_term
XLOC_001819	XLOC_001819	Scaffold_1:4124127-4124544	C	T	OK	396.72	371.51	-0.0947184	-0.334567	Peroxide stress regulator%3B Ferric uptake regulation protein%3B Fe2+/Zn2+ uptake regulation proteins
XLOC_001820	XLOC_001820	Scaffold_1:4124550-4125504	C	T	OK	436.695	392.71	-0.153162	-0.692046	Ferrochelatase%2C protoheme ferro-lyase (EC 4.99.1.1);Ontology_term
XLOC_001821	XLOC_001821	Scaffold_1:4125837-4126863	C	T	OK	686.691	624.01	-0.138094	-0.644228	Pectate lyase precursor (EC 4.2.2.2);Ontology_term
XLOC_001822	XLOC_001822	Scaffold_1:4134302-4134425	C	T	NOTEST	0	0	0	0	hypothetical protein
XLOC_001823	XLOC_001823	Scaffold_1:4134588-4135377	C	T	OK	395.138	397.409	0.00827011	0.0350019	Formate efflux transporter (TC 2.A.44 family)
XLOC_001824	XLOC_001824	Scaffold_1:4135461-4135851	C	T	OK	190.049	187.836	-0.016892	-0.0546244	FIG01226214: hypothetical protein
XLOC_001825	XLOC_001825	Scaffold_1:4141532-4141880	C	T	OK	197.311	317.058	0.684275	2.12538	transcriptional regulator (Xre family)
XLOC_001826	XLOC_001826	Scaffold_1:4143218-4144885	C	T	OK	483.753	471.215	-0.037886	-0.157641	Two-component response regulator YvcP
XLOC_001827	XLOC_001827	Scaffold_1:4145291-4147908	C	T	OK	765.549	745.701	-0.0378972	-0.15593	ABC transporter ATP-binding protein YvcR
XLOC_001828	XLOC_001828	Scaffold_1:4147914-4148268	C	T	OK	397.409	353.957	-0.16705	-0.564944	DUF1093 domain-containing protein
XLOC_001829	XLOC_001829	Scaffold_1:4148379-4148574	C	T	OK	288.456	179.741	-0.682437	-1.38327	hypothetical protein
XLOC_001830	XLOC_001830	Scaffold_1:4148885-4149996	C	T	OK	203.6	211.847	0.0572854	0.0427128	FIG01248233: hypothetical protein
XLOC_001831	XLOC_001831	Scaffold_1:4151576-4152125	C	T	OK	356.847	331.691	-0.105466	-0.386523	Pyridoxamine 5'-phosphate oxidase (EC 1.4.3.5);Ontology_term
XLOC_001832	XLOC_001832	Scaffold_1:4155007-4156360	C	T	OK	419.502	397.816	-0.0765764	-0.354415	Malate Na(+) symporter
XLOC_001833	XLOC_001833	Scaffold_1:4162753-4163321	C	T	OK	522.65	450.293	-0.21498	-0.775892	Transcriptional regulator ArcR essential for anaerobic expression of the ADI pathway%2C Crp/Fnr family
XLOC_001834	XLOC_001834	Scaffold_1:4163453-4164695	C	T	OK	732.636	693.432	-0.0793427	-0.377588	Arginine deiminase (EC 3.5.3.6);Ontology_term
XLOC_001835	XLOC_001835	Scaffold_1:4164724-4165732	C	T	OK	495.678	455.816	-0.12095	-0.550265	Ornithine carbamoyltransferase (EC 2.1.3.3);Ontology_term
XLOC_001836	XLOC_001836	Scaffold_1:4165785-4167192	C	T	OK	523.552	510.603	-0.0361313	-0.171567	Arginine/ornithine antiporter ArcD
XLOC_001837	XLOC_001837	Scaffold_1:4167213-4168164	C	T	OK	459.688	443.073	-0.0531093	-0.242947	Carbamate kinase (EC 2.7.2.2);Ontology_term
XLOC_001838	XLOC_001838	Scaffold_1:4168273-4168951	C	T	OK	793.619	742.683	-0.0956999	-0.435464	Transcriptional regulator ArcR essential for anaerobic expression of the ADI pathway%2C Crp/Fnr family
XLOC_001839	XLOC_001839	Scaffold_1:4173616-4174849	C	T	OK	310.259	320.399	0.0463954	0.20998	Tripeptide aminopeptidase (EC 3.4.11.4);Ontology_term
XLOC_001840	XLOC_001840	Scaffold_1:4181076-4182051	C	T	OK	216.287	255.468	0.240196	0.976161	Sucrose operon repressor ScrR%2C LacI family
XLOC_001841	XLOC_001841	Scaffold_1:4182298-4182778	C	T	OK	119.545	137.516	0.202048	0.637799	Uncharacterized protein in polymyxin biosynthetic cluster
XLOC_001842	XLOC_001842	Scaffold_1:4184061-4185192	C	T	OK	121.259	167.871	0.469264	1.82763	Methionine synthase II (cobalamin-independent)
XLOC_001843	XLOC_001843	Scaffold_1:4185535-4188774	C	T	OK	170.271	223.195	0.39047	1.54209	putative integral membrane protein
XLOC_001844	XLOC_001844	Scaffold_1:4188804-4189800	C	T	OK	286.031	324.664	0.182776	0.809798	UDP-glucose 4-epimerase (EC 5.1.3.2);Ontology_term
XLOC_001845	XLOC_001845	Scaffold_1:4194531-4195725	C	T	OK	342.798	373.983	0.125611	0.564411	Nucleoside permease NupC
XLOC_001846	XLOC_001846	Scaffold_1:4195901-4196276	C	T	OK	85.8675	78.728	-0.125234	-0.34491	CDS_ID OB1122
XLOC_001847	XLOC_001847	Scaffold_1:4207787-4207946	C	T	OK	200.528	477.895	1.25289	1.51804	FIG01239786: hypothetical protein
XLOC_001848	XLOC_001848	Scaffold_1:4211257-4213447	C	T	OK	68.0903	85.6229	0.330546	1.32515	FIG01240016: hypothetical protein
XLOC_001849	XLOC_001849	Scaffold_1:4229030-4230548	C	T	OK	157.946	0	#NAME?	#NAME?	hypothetical protein
XLOC_001850	XLOC_001850	Scaffold_1:4241013-4241136	C	T	OK	1114.84	383.472	-1.53964	-0.755606	hypothetical protein
XLOC_001851	XLOC_001851	Scaffold_1:4241456-4245058	C	T	OK	1524.01	1412.87	-0.109243	-0.484396	hypothetical protein
XLOC_001852	XLOC_001852	Scaffold_1:4245095-4248445	C	T	OK	666.26	664.486	-0.00384565	-0.0178179	Dolichol-phosphate mannosyltransferase (EC 2.4.1.83) in lipid-linked oligosaccharide synthesis cluster;Ontology_term
XLOC_001853	XLOC_001853	Scaffold_1:4265700-4266465	C	T	OK	391.833	356.845	-0.134944	-0.545725	Transcriptional repressor of the myo-inositol catabolic operon DeoR family
XLOC_001854	XLOC_001854	Scaffold_1:4266548-4267484	C	T	OK	592.214	510.703	-0.213635	-0.987589	Oxidoreductase ion channel
XLOC_001855	XLOC_001855	Scaffold_1:4267728-4268622	C	T	OK	467.222	470.566	0.0102897	0.0453651	Glycerophosphoryl diester phosphodiesterase%2C periplasmic (EC 3.1.4.46);Ontology_term
XLOC_001856	XLOC_001856	Scaffold_1:4268644-4270003	C	T	OK	355.041	346.751	-0.0340874	-0.15861	Glycerol-3-phosphate transporter
XLOC_001857	XLOC_001857	Scaffold_1:4272365-4273904	C	T	OK	353.24	342.689	-0.0437498	-0.2033	FIG01234118: hypothetical protein
XLOC_001858	XLOC_001858	Scaffold_1:4277386-4278346	C	T	OK	332.602	294.177	-0.177111	-0.734728	Ferrichrome-binding periplasmic protein precursor (TC 3.A.1.14.3)
XLOC_001859	XLOC_001859	Scaffold_1:4278958-4279330	C	T	OK	1283.79	1244.29	-0.0450849	-0.18963	FIG01235328: hypothetical protein
XLOC_001860	XLOC_001860	Scaffold_1:4287787-4288159	C	T	OK	625.569	579.374	-0.110675	-0.417926	FIG01239238: hypothetical protein
XLOC_001861	XLOC_001861	Scaffold_1:4291773-4292904	C	T	OK	589.317	607.066	0.042809	0.201071	Alanine dehydrogenase (EC 1.4.1.1);Ontology_term
XLOC_001862	XLOC_001862	Scaffold_1:4301360-4302530	C	T	OK	813.224	812.177	-0.00185849	-0.00881991	Galactokinase (EC 2.7.1.6);Ontology_term
XLOC_001863	XLOC_001863	Scaffold_1:4302545-4305031	C	T	OK	799.266	759.24	-0.0741199	-0.348722	UDP-glucose 4-epimerase (EC 5.1.3.2);Ontology_term
XLOC_001864	XLOC_001864	Scaffold_1:4306391-4306817	C	T	OK	276.964	284.395	0.0381991	0.130125	Transcriptional regulator%2C MarR family
XLOC_001865	XLOC_001865	Scaffold_1:4306880-4307726	C	T	OK	1647.37	606.298	-1.44206	-0.332972	unknown
XLOC_001866	XLOC_001866	Scaffold_1:4307835-4308567	C	T	OK	477.387	484.813	0.0222687	0.095384	Gluconate operon transcriptional repressor
XLOC_001867	XLOC_001867	Scaffold_1:4308571-4310101	C	T	OK	607.278	544.878	-0.156424	-0.74546	Gluconokinase (EC 2.7.1.12);Ontology_term
XLOC_001868	XLOC_001868	Scaffold_1:4310122-4311469	C	T	OK	553.438	491.011	-0.172667	-0.81879	Gluconate permease%2C Bsu4004 homolog
XLOC_001869	XLOC_001869	Scaffold_1:4311499-4312903	C	T	OK	533.784	521.858	-0.0325973	-0.15449	6-phosphogluconate dehydrogenase%2C decarboxylating (EC 1.1.1.44);Ontology_term
XLOC_001870	XLOC_001870	Scaffold_1:4313177-4315781	C	T	OK	368.976	352.157	-0.067309	-0.322043	Alcohol dehydrogenase (EC 1.1.1.1)%3B Acetaldehyde dehydrogenase (EC 1.2.1.10);Ontology_term
XLOC_001871	XLOC_001871	Scaffold_1:4316047-4316611	C	T	OK	500.509	482.567	-0.0526662	-0.208095	Alkyl hydroperoxide reductase protein C (EC 1.6.4.-);Ontology_term
XLOC_001872	XLOC_001872	Scaffold_1:4316624-4318154	C	T	OK	278.671	260.05	-0.0997785	-0.45056	Alkyl hydroperoxide reductase protein F (EC 1.6.4.-);Ontology_term
XLOC_001873	XLOC_001873	Scaffold_1:4321340-4321826	C	T	OK	581.687	689.193	0.244663	0.995009	FIG01225621: hypothetical protein
XLOC_001874	XLOC_001874	Scaffold_1:4321847-4322312	C	T	OK	154.162	136.835	-0.172015	-0.548201	FIG01225307: hypothetical protein
XLOC_001875	XLOC_001875	Scaffold_1:4322326-4322482	C	T	NOTEST	0	0	0	0	hypothetical protein
XLOC_001876	XLOC_001876	Scaffold_1:4323124-4325050	C	T	OK	434.094	389.343	-0.156964	-0.743614	Fructose-1%2C6-bisphosphatase%2C Bacillus type (EC 3.1.3.11);Ontology_term
XLOC_001877	XLOC_001877	Scaffold_1:4325276-4325606	C	T	OK	516.036	511.393	-0.0130396	-0.0442535	Alkyl hydroperoxide reductase protein F (EC 1.6.4.-);Ontology_term
XLOC_001878	XLOC_001878	Scaffold_1:4326844-4327771	C	T	OK	517.285	489.758	-0.0788898	-0.353772	Ferrichrome-binding periplasmic protein precursor (TC 3.A.1.14.3)
XLOC_001879	XLOC_001879	Scaffold_1:4327846-4329867	C	T	OK	1620.23	1306.79	-0.310172	-1.46476	ABC-type Fe3+-siderophore transport system%2C permease component
XLOC_001880	XLOC_001880	Scaffold_1:4330371-4332323	C	T	OK	473.124	474.935	0.00551175	0.0111439	FIG01240834: hypothetical protein
XLOC_001881	XLOC_001881	Scaffold_1:4332590-4334227	C	T	OK	1103.89	1043.63	-0.0809976	-0.376811	ABC transporter%2C ATP-binding protein
XLOC_001882	XLOC_001882	Scaffold_1:4334233-4335972	C	T	OK	1181.75	1090.32	-0.116167	-0.520476	sensor histidine kinase
XLOC_001883	XLOC_001883	Scaffold_1:4338855-4339662	C	T	OK	522.152	432.634	-0.271323	-1.13771	hypothetical protein
XLOC_001884	XLOC_001884	Scaffold_1:4353928-4354195	C	T	OK	289.842	304.79	0.0725474	0.216596	hypothetical protein
XLOC_001885	XLOC_001885	Scaffold_1:4355760-4355958	C	T	OK	56.8431	28.3369	-1.0043	-1.05471	unknown
XLOC_001886	XLOC_001886	Scaffold_1:4356352-4357768	C	T	OK	1500.76	1217.73	-0.301494	-0.0697332	unknown
XLOC_001887	XLOC_001887	Scaffold_1:4357972-4361515	C	T	OK	1745.49	1770.49	0.0205107	0.09321	N-acetylglucosamine-6-phosphate deacetylase (EC 3.5.1.25);Ontology_term
XLOC_001888	XLOC_001888	Scaffold_1:4361517-4362891	C	T	OK	635.313	576.896	-0.139157	-0.660092	PTS system%2C N-acetylglucosamine-specific IIB component (EC 2.7.1.69) / PTS system%2C N-acetylglucosamine-specific IIC component (EC 2.7.1.69);Ontology_term
XLOC_001889	XLOC_001889	Scaffold_1:4366843-4367320	C	T	OK	210.828	183.767	-0.198185	-0.682118	Spore coat protein F
XLOC_001890	XLOC_001890	Scaffold_1:4369480-4370782	C	T	OK	664.259	619.562	-0.100498	-0.477082	FIG01233340: hypothetical protein
XLOC_001891	XLOC_001891	Scaffold_1:4370782-4370896	C	T	NOTEST	0	0	0	0	hypothetical protein
XLOC_001892	XLOC_001892	Scaffold_1:4375001-4375619	C	T	OK	245.73	284.33	0.210492	0.762999	Spore protease GPR related protein
XLOC_001893	XLOC_001893	Scaffold_1:4377259-4377388	C	T	NOTEST	0	0	0	0	hypothetical protein
XLOC_001894	XLOC_001894	Scaffold_1:4385684-4386168	C	T	OK	139.993	24.3613	-2.5227	-0.574294	hypothetical protein
XLOC_001895	XLOC_001895	Scaffold_1:4387027-4388368	C	T	OK	365.182	347.842	-0.0701821	-0.321883	Chromosomal replication initiator protein DnaA
XLOC_001896	XLOC_001896	Scaffold_1:4388545-4389682	C	T	OK	307.03	303.324	-0.0175208	-0.0764459	DNA polymerase III beta subunit (EC 2.7.7.7);Ontology_term
XLOC_001897	XLOC_001897	Scaffold_1:4389848-4390064	C	T	OK	278.298	294.309	0.0807023	0.18881	FIG002958: hypothetical protein
XLOC_001898	XLOC_001898	Scaffold_1:4390080-4391193	C	T	OK	327.02	337.79	0.0467485	0.207458	DNA recombination and repair protein RecF
XLOC_001899	XLOC_001899	Scaffold_1:4391210-4391453	C	T	OK	296.542	544.803	0.877497	2.48884	OrfX
XLOC_001900	XLOC_001900	Scaffold_1:4391507-4393427	C	T	OK	520.785	529.741	0.0245986	0.118047	DNA gyrase subunit B (EC 5.99.1.3);Ontology_term
XLOC_001901	XLOC_001901	Scaffold_1:4393618-4396087	C	T	OK	388.864	368.101	-0.0791621	-0.378758	DNA gyrase subunit A (EC 5.99.1.3);Ontology_term
XLOC_001902	XLOC_001902	Scaffold_1:1972-2950	C	T	OK	308.062	312.74	0.021744	0.0908102	FIG01227654: hypothetical protein
XLOC_001903	XLOC_001903	Scaffold_1:9336-10467	C	T	OK	638.796	631.337	-0.0169433	-0.0801789	Glycerate kinase (EC 2.7.1.31);Ontology_term
XLOC_001904	XLOC_001904	Scaffold_1:10482-11751	C	T	OK	476.64	434.534	-0.133433	-0.627165	D-glycerate transporter (predicted)
XLOC_001905	XLOC_001905	Scaffold_1:11840-12959	C	T	OK	590.341	572.708	-0.0437489	-0.204905	Sugar diacid utilization regulator SdaR
XLOC_001906	XLOC_001906	Scaffold_1:12988-13411	C	T	OK	296.799	348.973	0.233626	0.806236	hypothetical protein
XLOC_001907	XLOC_001907	Scaffold_1:13772-15034	C	T	OK	555.237	495.087	-0.165422	-0.694953	Deoxyadenosine kinase (EC 2.7.1.76) / Deoxyguanosine kinase (EC 2.7.1.113);Ontology_term
XLOC_001908	XLOC_001908	Scaffold_1:15119-16439	C	T	OK	498.206	513.539	0.0437314	0.206788	Spore cortex-lytic enzyme%2C N-acetylglucosaminidase SleL (EC 3.2.1.-);Ontology_term
XLOC_001909	XLOC_001909	Scaffold_1:16475-17589	C	T	OK	315.329	316.52	0.00543758	0.0131664	tRNA-specific adenosine-34 deaminase (EC 3.5.4.-);Ontology_term
XLOC_001910	XLOC_001910	Scaffold_1:21345-21474	C	T	OK	310.475	0	#NAME?	#NAME?	hypothetical protein
XLOC_001911	XLOC_001911	Scaffold_1:31324-31609	C	T	OK	295.03	306.406	0.0545864	0.165306	Transition state regulatory protein AbrB
XLOC_001912	XLOC_001912	Scaffold_1:130994-131453	C	T	OK	774.36	818.218	0.0794807	0.331052	FIG01228969: hypothetical protein
XLOC_001913	XLOC_001913	Scaffold_1:135662-136160	C	T	OK	67.4163	89.7076	0.412133	1.21553	Spore germination protein GerD
XLOC_001914	XLOC_001914	Scaffold_1:136965-137730	C	T	OK	327.202	324.312	-0.0127993	-0.0513628	polysaccharide deacetylase%2C putative
XLOC_001915	XLOC_001915	Scaffold_1:140338-140605	C	T	OK	63.2663	92.2844	0.54465	1.11573	hypothetical protein
XLOC_001916	XLOC_001916	Scaffold_1:141229-141910	C	T	OK	704.197	675.816	-0.0593479	-0.264839	FIG01230994: hypothetical protein
XLOC_001917	XLOC_001917	Scaffold_1:141949-142180	C	T	OK	287.354	342.547	0.253471	0.673559	conserved hypothetical protein
XLOC_001918	XLOC_001918	Scaffold_1:145621-145906	C	T	OK	177.099	166.341	-0.0904048	-0.250197	Uncharacterized protein yoaF
XLOC_001919	XLOC_001919	Scaffold_1:145971-146334	C	T	OK	200.452	213.335	0.0898636	0.27841	probable uroporphyrin-III c-methyltransferase (EC 2.1.1.107);Ontology_term
XLOC_001920	XLOC_001920	Scaffold_1:146417-147182	C	T	OK	240.466	291.651	0.27841	1.13441	DltE
XLOC_001921	XLOC_001921	Scaffold_1:148831-150217	C	T	OK	69.3929	105.63	0.606157	2.26467	Predicted L-rhamnose permease RhaY
XLOC_001922	XLOC_001922	Scaffold_1:155309-156137	C	T	OK	106.059	133.817	0.335402	1.2164	Transcriptional regulator%2C TrmB family
XLOC_001923	XLOC_001923	Scaffold_1:160138-160297	C	T	OK	132.438	49.7873	-1.41147	-1.08886	hypothetical protein
XLOC_001924	XLOC_001924	Scaffold_1:160732-161158	C	T	OK	180.794	186.686	0.0462618	0.151664	PhnB protein%3B putative DNA binding 3-demethylubiquinone-9 3-methyltransferase domain protein
XLOC_001925	XLOC_001925	Scaffold_1:161252-162302	C	T	OK	197.839	0	#NAME?	#NAME?	Transcriptional regulator%2C DeoR family
XLOC_001926	XLOC_001926	Scaffold_1:178404-178530	C	T	OK	262.646	0	#NAME?	#NAME?	hypothetical protein
XLOC_001927	XLOC_001927	Scaffold_1:178578-179898	C	T	OK	235.189	235.428	0.00146609	0.0064245	Tyrosyl-tRNA synthetase (EC 6.1.1.1);Ontology_term
XLOC_001928	XLOC_001928	Scaffold_1:180086-180533	C	T	OK	236.418	253.157	0.0986924	0.334289	Putative HTH-type transcriptional regulator ywaE
XLOC_001929	XLOC_001929	Scaffold_1:180730-181686	C	T	OK	590.799	619.661	0.0688114	0.254	FIG01248374: hypothetical protein
XLOC_001930	XLOC_001930	Scaffold_1:183388-184381	C	T	OK	185.455	163.282	-0.183702	-0.713007	alternate gene name: ydjQ
XLOC_001931	XLOC_001931	Scaffold_1:184475-184784	C	T	OK	420.355	418.485	-0.00643442	-0.0209892	FIG01244191: hypothetical protein
XLOC_001932	XLOC_001932	Scaffold_1:184900-185158	C	T	OK	477.482	453.924	-0.0729961	-0.221695	FIG01250527: hypothetical protein
XLOC_001933	XLOC_001933	Scaffold_1:186821-187700	C	T	OK	470.792	518.133	0.138231	0.618678	transcriptional regulator%2C AraC family
XLOC_001934	XLOC_001934	Scaffold_1:187802-189344	C	T	OK	471.95	440.995	-0.0978703	-0.463609	Spore coat protein A
XLOC_001935	XLOC_001935	Scaffold_1:190662-191583	C	T	OK	152.408	165.847	0.121914	0.455932	hypothetical protein
XLOC_001936	XLOC_001936	Scaffold_1:216860-217460	C	T	OK	223.202	243.252	0.1241	0.449026	Transcriptional regulator%2C TetR family
XLOC_001937	XLOC_001937	Scaffold_1:219341-219575	C	T	OK	73.1043	159.151	1.12237	1.74939	hypothetical protein
XLOC_001938	XLOC_001938	Scaffold_1:220607-220838	C	T	OK	75.5865	53.2907	-0.504245	-0.783993	FIG01226624: hypothetical protein
XLOC_001939	XLOC_001939	Scaffold_1:239349-240042	C	T	OK	184.422	221.053	0.261385	0.963707	Mg(2+) transport ATPase protein C
XLOC_001940	XLOC_001940	Scaffold_1:240261-241743	C	T	OK	499.115	532.177	0.0925339	0.438893	Sodium/proline symporter
XLOC_001941	XLOC_001941	Scaffold_1:246219-247302	C	T	OK	318.804	378.3	0.246864	1.12035	Glutamine amidotransferase%2C class-II
XLOC_001942	XLOC_001942	Scaffold_1:247424-248273	C	T	OK	134.754	174.967	0.376754	1.34688	TetR family transcriptional regulator probably coupled to RND multidrug efflux transporter
XLOC_001943	XLOC_001943	Scaffold_1:251997-252540	C	T	OK	183.55	173.221	-0.083561	-0.287061	Ribosomal-protein-S5p-alanine acetyltransferase
XLOC_001944	XLOC_001944	Scaffold_1:252553-253507	C	T	OK	278.376	318.108	0.192481	0.848232	Inosine-uridine preferring nucleoside hydrolase (EC 3.2.2.1);Ontology_term
XLOC_001945	XLOC_001945	Scaffold_1:257452-257593	C	T	OK	100.424	0	#NAME?	#NAME?	hypothetical protein
XLOC_001946	XLOC_001946	Scaffold_1:257634-258051	C	T	OK	55.531	78.2218	0.494278	1.33082	Site-specific recombinase
XLOC_001947	XLOC_001947	Scaffold_1:258212-260563	C	T	OK	199.408	193.577	-0.0428202	-0.126693	hypothetical protein
XLOC_001948	XLOC_001948	Scaffold_1:264337-265683	C	T	OK	143.166	149.547	0.0629169	0.239746	hypothetical protein
XLOC_001949	XLOC_001949	Scaffold_1:268472-269390	C	T	OK	150.233	171.482	0.190858	0.678689	unknown
XLOC_001950	XLOC_001950	Scaffold_1:270453-270591	C	T	NOTEST	0	0	0	0	hypothetical protein
XLOC_001951	XLOC_001951	Scaffold_1:280392-281443	C	T	OK	27.5757	64.3683	1.22295	0.146558	Transporter
XLOC_001952	XLOC_001952	Scaffold_1:281512-282403	C	T	OK	858.202	893.264	0.0577688	0.272189	Permease of the drug/metabolite transporter (DMT) superfamily
XLOC_001953	XLOC_001953	Scaffold_1:289122-290040	C	T	OK	252.468	275.576	0.126349	0.524699	Heme O synthase%2C protoheme IX farnesyltransferase (EC 2.5.1.-) COX10-CtaB;Ontology_term
XLOC_001954	XLOC_001954	Scaffold_1:294349-295264	C	T	OK	129.343	204.04	0.657644	2.46967	Chromosome initiation inhibitor
XLOC_001955	XLOC_001955	Scaffold_1:296300-296441	C	T	NOTEST	0	0	0	0	hypothetical protein
XLOC_001956	XLOC_001956	Scaffold_1:296482-297385	C	T	OK	122.059	167.178	0.453799	1.63959	GTP cyclohydrolase I (EC 3.5.4.16) type 2;Ontology_term
XLOC_001957	XLOC_001957	Scaffold_1:307954-308785	C	T	OK	260.295	250.789	-0.0536744	-0.207191	FIG01242618: hypothetical protein
XLOC_001958	XLOC_001958	Scaffold_1:310902-312459	C	T	OK	307.799	315.807	0.0370528	0.171261	ABC transporter ATP-binding protein
XLOC_001959	XLOC_001959	Scaffold_1:313770-314793	C	T	OK	551.651	517.988	-0.0908352	-0.424092	Putative oxidoreductase YncB
XLOC_001960	XLOC_001960	Scaffold_1:314849-315233	C	T	OK	559.622	560.222	0.00154721	0.00546885	FIG01227429: hypothetical protein
XLOC_001961	XLOC_001961	Scaffold_1:318262-319045	C	T	OK	567.993	543.765	-0.0628917	-0.290059	possible Zn-dependent hydrolase%2C beta-lactamase superfamily
XLOC_001962	XLOC_001962	Scaffold_1:324111-325031	C	T	OK	547.302	561.426	0.0367568	0.115445	FIG038982: hypothetical protein
XLOC_001963	XLOC_001963	Scaffold_1:325138-325411	C	T	OK	86.781	140.07	0.690701	1.66867	Acylphosphate phosphohydrolase (EC 3.6.1.7)%2C putative;Ontology_term
XLOC_001964	XLOC_001964	Scaffold_1:326213-326345	C	T	OK	0	143.137	inf	#NAME?	unknown
XLOC_001965	XLOC_001965	Scaffold_1:326475-326631	C	T	OK	38.7265	43.7598	0.176286	0.0713815	FIG01231981: hypothetical protein
XLOC_001966	XLOC_001966	Scaffold_1:326714-327467	C	T	OK	406.295	409.752	0.012225	0.0511567	Methionine aminopeptidase (EC 3.4.11.18);Ontology_term
XLOC_001967	XLOC_001967	Scaffold_1:327591-329553	C	T	OK	146.738	172.946	0.237083	1.04048	Lipoteichoic acid synthase LtaS Type Ia
XLOC_001968	XLOC_001968	Scaffold_1:346843-348477	C	T	OK	264.962	371.881	0.489053	1.83761	polysaccharide biosynthesis protein
XLOC_001969	XLOC_001969	Scaffold_1:348491-349466	C	T	OK	139.064	168.735	0.27901	1.08837	UDP-glucose 4-epimerase (EC 5.1.3.2);Ontology_term
XLOC_001970	XLOC_001970	Scaffold_1:349533-350907	C	T	OK	230.445	255.981	0.151617	0.681826	hypothetical aminotransferase%2C class-II
XLOC_001971	XLOC_001971	Scaffold_1:351060-353304	C	T	OK	327.63	360.574	0.138228	0.654474	putative glycosyl transferase family 2/4 protein
XLOC_001972	XLOC_001972	Scaffold_1:358354-359634	C	T	OK	74.0084	99.5426	0.427625	0.487484	Predicted hydrolase from alpha/beta family%2C YQKD B.subtilis ortholog
XLOC_001973	XLOC_001973	Scaffold_1:360489-364827	C	T	OK	113.638	155.721	0.454519	2.13517	2'%2C3'-cyclic-nucleotide 2'-phosphodiesterase (EC 3.1.4.16) / 5'-nucleotidase (EC 3.1.3.5);Ontology_term
XLOC_001974	XLOC_001974	Scaffold_1:365610-365826	C	T	OK	30.5439	68.9775	1.17524	1.40123	Hypothetical protein YfkK
XLOC_001975	XLOC_001975	Scaffold_1:365917-367276	C	T	OK	57.2274	74.9919	0.390028	1.41476	Sodium/glycine symporter GlyP
XLOC_001976	XLOC_001976	Scaffold_1:369327-370506	C	T	OK	190.102	246.179	0.372933	1.55695	L-Proline/Glycine betaine transporter ProP
XLOC_001977	XLOC_001977	Scaffold_1:373280-374402	C	T	OK	346.789	346.763	-0.000107541	-0.000486704	Thioredoxin-like oxidoreductases
XLOC_001978	XLOC_001978	Scaffold_1:377088-377685	C	T	OK	214.383	221.95	0.0500426	0.178519	hypothetical protein
XLOC_001979	XLOC_001979	Scaffold_1:377743-378706	C	T	OK	364.84	355.099	-0.0390433	-0.168373	Magnesium and cobalt transport protein CorA
XLOC_001980	XLOC_001980	Scaffold_1:383654-384230	C	T	OK	323.988	302.975	-0.0967412	-0.36154	Transcriptional regulator%2C TetR family
XLOC_001981	XLOC_001981	Scaffold_1:390804-391311	C	T	OK	400.564	349.945	-0.194901	-0.729391	Carbonic anhydrase (EC 4.2.1.1);Ontology_term
XLOC_001982	XLOC_001982	Scaffold_1:391322-395473	C	T	OK	895.637	842.724	-0.0878526	-0.406771	Hypothetical transmembrane protein coupled to NADH-ubiquinone oxidoreductase chain 5 homolog
XLOC_001983	XLOC_001983	Scaffold_1:395648-396068	C	T	OK	815.222	730.684	-0.157945	-0.643158	hypothetical protein
XLOC_001984	XLOC_001984	Scaffold_1:396290-396842	C	T	OK	767.899	762.227	-0.0106946	-0.0471871	DJ-1/YajL/PfpI superfamily%2C includes chaperone protein YajL (former ThiJ)%2C parkinsonism-associated protein DJ-1%2C peptidases PfpI%2C Hsp31
XLOC_001985	XLOC_001985	Scaffold_1:401731-403890	C	T	OK	748.142	692.092	-0.112349	-0.210038	Transcriptional activator of acetoin dehydrogenase operon AcoR
XLOC_001986	XLOC_001986	Scaffold_1:408060-408639	C	T	OK	350.168	333.365	-0.070945	-0.270515	hypothetical protein
XLOC_001987	XLOC_001987	Scaffold_1:408745-409723	C	T	OK	429.25	405.477	-0.0821973	-0.368335	FIG01233741: hypothetical protein
XLOC_001988	XLOC_001988	Scaffold_1:409876-410215	C	T	OK	428.436	408.458	-0.0688926	-0.228039	Transcriptional regulator%2C HxlR family
XLOC_001989	XLOC_001989	Scaffold_1:411896-415874	C	T	OK	253.415	305.214	0.268324	0.370492	Beta-xylosidase (EC 3.2.1.37);Ontology_term
XLOC_001990	XLOC_001990	Scaffold_1:423728-423923	C	T	OK	366.241	379.044	0.0495747	0.0938035	unknown
XLOC_001991	XLOC_001991	Scaffold_1:423991-424105	C	T	OK	0	4034.21	inf	#NAME?	hypothetical protein
XLOC_001992	XLOC_001992	Scaffold_1:424172-424703	C	T	OK	195.381	153.349	-0.349469	-1.20521	Ribosomal-protein-alanine acetyltransferase (EC 2.3.1.128);Ontology_term
XLOC_001993	XLOC_001993	Scaffold_1:424969-425872	C	T	OK	652.726	635.027	-0.0396584	-0.184183	Cell division inhibitor Slr1223 (YfcH in EC)%2C contains epimerase/dehydratase and DUF1731 domains
XLOC_001994	XLOC_001994	Scaffold_1:427077-427424	C	T	OK	784.319	695.79	-0.17279	-0.492607	hypothetical protein
XLOC_001995	XLOC_001995	Scaffold_1:428566-433458	C	T	OK	341.981	298.974	-0.193894	-0.409209	stress response protein
XLOC_001996	XLOC_001996	Scaffold_1:434775-435000	C	T	OK	489.682	368.979	-0.408307	-1.16149	YfhS protein
XLOC_001997	XLOC_001997	Scaffold_1:444608-445679	C	T	OK	256.101	249.208	-0.0393623	-0.159885	Putative lipoprotein SAV1865
XLOC_001998	XLOC_001998	Scaffold_1:445930-447229	C	T	OK	303.311	285.2	-0.0888232	-0.407253	Glutamate-1-semialdehyde aminotransferase (EC 5.4.3.8);Ontology_term
[truncated: 1,993 more rows]
